# Supplementary material for: Genome-Wide Transcriptional Analysis of Differentially Expressed Genes in Diabetic, Healing Corneal Epithelial Cells: Hyperglycemia-Suppressed TGFβ3 Expression Contributes to the Delay of Epithelial Wound Healing in Diabetic Corneas
Source: Oxford University Press journal article supplement (doi:10.2337/db13-1260), 2013-12-05
Supplement: db131260supplementarydata.xls [file db131260supplementarydata.xls]

## Sheet: Sheet1
Supplemental Material 1: Defferentially Expressed genes in rat corneaal epithelia detected by Genome-wide cDNA array
		NL42 vs NL0		DM42 vs DM0		DM0 vs NL0		(DM42 vs NL42
Gene Symbol	Gene Title	p-value	Fold-Change	p-value	Fold-Change	p-value	Fold-Change	p-value	Fold-Change
RT1-EC2	RT1 class Ib, locus EC2	0.843977	-1.24066	0.500781	2.11252	0.182875	4.6966	0.0454842	12.3094
Ephx2	epoxide hydrolase 2, cytoplasmic	0.0596885	1.34846	0.575894	1.08276	4.44589e-08	14.8351	8.65058e-08	11.9119
LOC100364500 /// RT1-A3 /// RT1-CE10 /// RT1-CE2 /// RT1-EC2	RT1 class I, locus CE11-like /// RT1 class I, locus A3 /// RT1 class I, locus CE10 ///	0.894602	-1.12441	0.311257	2.52632	0.379933	2.21839	0.0640836	6.3016
LOC690700 /// LOC691600	similar to similar to RIKEN cDNA 1700001E04 /// similar to Discs large homolog 5 (Place	0.986099	-1.00622	0.112701	1.84974	0.0163097	2.84654	0.00130561	5.29813
LOC100911353	uncharacterized LOC100911353	0.643924	1.22713	0.0219282	3.34998	0.311375	1.58495	0.00886401	4.32683
LOC689329	Hypothetical protein LOC689329	0.883004	1.0564	0.180134	1.69946	0.0465275	2.33814	0.00632068	3.76146
LOC679551	Similar to MIC2 like 1	0.686628	-1.11702	0.22118	1.42036	0.0152458	2.25485	0.00132188	3.57749
Nqo2	NAD(P)H dehydrogenase, quinone 2	0.807201	1.43613	0.327002	4.47267	0.949035	1.09925	0.416015	3.42349
LOC100360398	hypothetical protein LOC100360398	0.729935	1.12661	0.0921775	1.89209	0.10526	1.83839	0.0096264	3.08748
Arid2	AT rich interactive domain 2 (Arid-rfx like)	0.65606	-1.15662	0.370181	1.34812	0.0666958	1.94909	0.00769611	3.03913
Gp2	glycoprotein 2 (zymogen granule membrane)	0.832137	1.19458	0.34443	2.26087	0.626855	1.5074	0.232678	2.8529
Ctdspl	CTD (carboxy-terminal domain, RNA polymerase II, polypeptide A) small phosphatase-like	0.270521	-1.49291	0.191764	-1.62043	0.0138588	2.89265	0.0200348	2.66501
Gsta4	glutathione S-transferase alpha 4	0.0376208	-1.86749	0.177402	-1.44954	0.0249898	1.99517	0.00553558	2.57045
Hpgds	hematopoietic prostaglandin D synthase	0.215532	1.87831	0.0338872	3.31263	0.459412	1.43946	0.0820657	2.53867
Phgdh	phosphoglycerate dehydrogenase	1.54453e-05	-3.50594	0.0810931	-1.31171	0.644033	-1.06746	0.000145073	2.50389
Ahdc1	AT hook, DNA binding motif, containing 1 [Rattus	0.983365	1.00461	0.0394527	1.69121	0.112251	1.46434	0.00291431	2.46515
LOC363306	hypothetical protein LOC363306	0.0483122	-2.24502	0.182064	-1.66137	0.134807	1.78218	0.0352518	2.40827
Phb2	Prohibitin 2	0.983391	1.00617	0.96317	-1.01375	0.0148425	2.42591	0.0164848	2.37832
LOC301682	hypothetical gene supported by AF057564	0.961286	-1.01674	0.577448	1.21228	0.0931479	1.88095	0.0349036	2.31843
Ctdspl	CTD (carboxy-terminal domain, RNA polymerase II, polypeptide A) small phosphatase-like	0.226128	-1.20532	0.893382	1.0199	0.00264986	1.84225	0.000433892	2.26468
LOC680643	similar to MIC2 like 1	0.508527	-1.15135	0.923965	1.02026	0.012323	1.92493	0.00391721	2.26117
Auts2l	autism susceptibility candidate 2-like	0.000160226	-4.57997	0.000732377	-3.35719	0.0607745	1.64673	0.00763159	2.24651
RT1-Ba	RT1 class II, locus Ba	0.466539	1.13898	0.00463692	1.93763	0.223331	1.25196	0.00216402	2.12984
Smarcad1	SWI/SNF-related, matrix-associated actin-dependent regulator of chromatin, subfamily a,	0.791764	-1.07133	0.0427809	1.8353	0.778922	1.07603	0.017891	2.11571
RGD1310352	similar to HTGN29 protein; keratinocytes associated transmembrane protein 2	0.865548	1.06245	0.835257	1.07729	0.0679576	2.07678	0.0638534	2.10577
Zfp212	Zinc finger protein 212	0.227265	-1.44708	0.772005	-1.08839	0.146752	1.57468	0.0308935	2.09363
Angptl4	angiopoietin-like 4	0.00223797	-2.4023	0.791317	1.0558	0.333922	-1.22637	0.00638716	2.06817
RGD1560691	similar to calcium/calmodulin-dependent protein kinase 1D	0.00027808	-2.33018	4.36409e-05	-3.01299	0.000102224	2.66033	0.00078949	2.05744
Cdca7	cell division cycle associated 7	0.034444	1.62688	0.000319879	3.15578	0.861502	1.03505	0.00654128	2.00777
Man2a2	mannosidase 2, alpha 2	0.00231493	-1.94186	0.203497	-1.23283	0.154901	1.26794	0.00180987	1.99718
Ly6g6e	lymphocyte antigen 6 complex, locus G6E	0.0801306	-2.13942	0.468417	-1.33507	0.610052	1.22322	0.114225	1.96018
Rarb	Retinoic acid receptor, beta	0.0111808	2.15698	0.000237611	4.35726	0.868194	-1.04097	0.0221774	1.94056
Pdyn	prodynorphin	0.0310565	-2.72204	0.00642158	-4.06565	0.0246044	2.88355	0.124579	1.9306
Aqp4	aquaporin 4	2.89675e-05	19.8151	6.73857e-06	38.0072	0.993011	1.00319	0.100606	1.92422
Acsbg1	acyl-CoA synthetase bubblegum family member 1	0.000345219	-4.71648	0.00305361	-2.98266	0.486371	1.20985	0.0378088	1.91314
Krt4	keratin 4	0.0480542	1.42568	0.00666428	1.73761	0.0182402	1.56792	0.00277141	1.91097
Ankrd34b	ankyrin repeat domain 34B	0.342621	1.1907	0.0210247	1.64136	0.0990715	1.38098	0.00586496	1.90366
LOC100909409 /// LOC501467 /// LOC683878 /// LOC685183 /// LOC686886 /// LOC688649 /// LOC689453 /// LOC689635	disks large homolog 5-like /// similar to spermatogenesis associated glutamate (	0.680038	-1.08186	0.955314	1.01069	0.0167601	1.74009	0.00810556	1.90267
Gpr123	G protein-coupled receptor 123	0.778767	-1.05719	0.630521	1.10044	0.0362319	1.61753	0.0108095	1.8818
Phyhip	phytanoyl-CoA 2-hydroxylase interacting protein	2.5711e-08	-9.18243	5.4463e-08	-7.50359	0.00344154	1.53515	0.000312719	1.87862
Fus	fused in sarcoma	0.62965	-1.07898	0.311753	1.17788	0.0333409	1.4756	0.00322276	1.87534
Cdc20	cell division cycle 20 homolog (S. cerevisiae)	9.56452e-05	2.0614	5.67836e-07	4.22226	0.3445	-1.10674	0.000290342	1.8507
Sbk1	SH3-binding domain kinase 1	1.42308e-05	-3.04604	0.0010188	-1.82244	0.429784	1.10439	0.000892365	1.84588
Padi4	peptidyl arginine deiminase, type IV	4.22576e-05	-2.08817	0.153917	-1.15522	0.8543	1.01753	0.000160595	1.83928
Fcrla	Fc receptor-like A	0.683408	-1.27366	0.527742	-1.45853	0.229797	2.10295	0.318823	1.83639
Cdh10	cadherin 10	0.175249	-1.15852	0.597724	1.05586	0.00342167	1.50074	0.000276983	1.83576
S100g	S100 calcium binding protein G	9.89499e-05	12.5272	4.0785e-05	17.5155	0.469723	1.30867	0.126724	1.82977
Mt2A	metallothionein 2A	5.62677e-07	5.96815	1.68892e-07	8.05191	0.0419344	1.35323	0.00133282	1.82571
RT1-Ba	RT1 class II, locus Ba	0.552341	1.11998	0.0112361	1.81968	0.556627	1.11858	0.0113514	1.81741
Cdc20	Cell division cycle 20 homolog (S. cerevisiae)	0.000363371	1.86051	2.21241e-06	3.51974	0.673589	-1.0471	0.000500006	1.80672
GRIN2A	glutamate receptor, ionotropic, N-methyl D-aspartate 2A	3.32757e-05	-2.95707	0.0296994	-1.41145	0.279745	-1.16337	0.00198355	1.80086
Adh7	alcohol dehydrogenase 7 (class IV), mu or sigma polypeptide	2.80266e-06	-15.5608	1.79779e-05	-8.50938	0.942785	-1.0177	0.0385016	1.79685
Elovl4	Elongation of very long chain fatty acids (FEN1/Elo2, SUR4/Elo3, yeast)-like 4	0.0947929	2.30208	0.572899	1.29526	0.0300891	3.18504	0.221653	1.79207
Ikbkb	Inhibitor of kappa light polypeptide gene enhancer in B-cells, kinase beta	0.0492979	-2.13529	0.143379	-1.7017	0.31331	1.42273	0.11492	1.78525
Pofut1	protein O-fucosyltransferase 1	0.609677	-1.10101	0.417713	1.16739	0.11844	1.3727	0.0139197	1.76435
Pofut1	protein O-fucosyltransferase 1	0.609677	-1.10101	0.417713	1.16739	0.11844	1.3727	0.0139197	1.76435
SLC16A12	solute carrier family 16, member 12 (monocarboxylic acid transporter 12)	1.74107e-06	-25.079	5.15642e-06	-16.3199	0.612581	1.14758	0.0616957	1.76351
Efcab6	EF-hand calcium binding domain 6	0.1272	1.64328	0.00432419	3.15362	0.777344	-1.08912	0.0882115	1.76207
Mki67	antigen identified by monoclonal antibody Ki-67	4.78687e-05	2.35844	1.47836e-06	3.92964	0.621266	1.0574	0.000808705	1.76185
Bnc2	basonuclin 2	0.0287457	1.68499	0.00118972	2.61479	0.544747	1.13201	0.0207081	1.75666
Cdc20	cell division cycle 20 homolog (S. cerevisiae)	0.000305238	2.15749	1.66223e-06	4.83732	0.088894	-1.27887	0.00223005	1.75319
Plk1	polo-like kinase 1 (Drosophila)	6.54538e-06	3.04517	1.62516e-07	6.06613	0.257771	-1.14002	0.000833345	1.74738
LOC685157 /// LOC686862	similar to paired immunoglobin-like type 2 receptor beta /// similar to paired immunogl	0.689483	-1.05216	0.025886	1.39775	0.197833	1.18806	0.00188003	1.74722
Gsr	glutathione reductase	0.660716	-1.13219	0.353029	1.30816	0.561547	1.17939	0.0748217	1.74679
Cenpe	centromere protein E	9.65647e-06	3.15498	2.63552e-07	6.30577	0.261082	-1.15185	0.00151314	1.73519
Vom2r40	vomeronasal 2 receptor, 40	0.993321	1.00154	0.174655	1.30503	0.147731	1.33161	0.0150394	1.73511
Mfhas1	malignant fibrous histiocytoma amplified sequence 1	0.000502661	2.07993	0.000624779	2.03038	0.00227976	1.77604	0.00292579	1.73373
LOC688832	Hypothetical protein LOC688832	0.178691	1.28089	0.172273	1.28625	0.0116933	1.72612	0.0112665	1.73334
Cdt1	chromatin licensing and DNA replication factor 1	0.788791	-1.03941	0.00915176	1.61051	0.81562	1.0342	0.0043367	1.73123
Mx2	myxovirus (influenza virus) resistance 2	0.505174	1.5301	0.116391	2.92483	0.874325	-1.10469	0.394718	1.73037
RGD1305807	hypothetical LOC298077	0.679341	-1.02971	0.0383245	1.18422	0.000942229	1.4155	4.38817e-05	1.72607
Cdc20	Cell division cycle 20 homolog (S. cerevisiae)	0.0102872	2.01079	0.000654248	3.09064	0.595928	1.12255	0.0313621	1.7254
Kif1b	kinesin family member 1B	0.32265	1.10991	0.0010546	1.63973	0.160499	1.16536	0.000579602	1.72165
Fam149b1	Fam149b1 family with sequence similarity 149, member B1	0.367258	-1.10937	0.366338	1.10961	0.0150488	1.39776	0.00105796	1.72059
Fam149b1	Fam149b1 family with sequence similarity 149, member B1	0.367258	-1.10937	0.366338	1.10961	0.0150488	1.39776	0.00105796	1.72059
Gprc5b	G protein-coupled receptor, family C, group 5, member B	0.0076199	2.18024	0.00101106	3.02842	0.360444	1.2381	0.0391664	1.71977
Camta1	similar to KIAA0833 protein	0.812875	-1.04917	0.272416	1.26013	0.220205	1.2981	0.0249346	1.71622
Meis2	Meis homeobox 2	0.179414	-1.23548	0.894302	-1.01991	0.042649	1.41349	0.00568863	1.71226
Kif20a	kinesin family member 20A	1.41278e-05	2.38266	1.85946e-07	4.62656	0.20909	-1.13544	0.000418971	1.71014
Zfp346	zinc finger protein 346	0.394258	-1.14887	0.588651	1.09072	0.0796552	1.36258	0.00843588	1.70744
Ccdc74a	coiled-coil domain containing 74A	0.0146629	-1.25196	0.0497318	1.18223	0.0848781	1.15315	7.80052e-05	1.70678
Ate1	arginyltransferase 1	0.879074	-1.03234	0.747833	1.06975	0.0644058	1.54389	0.0300113	1.70498
Ate1	arginyltransferase 1	0.879074	-1.03234	0.747833	1.06975	0.0644058	1.54389	0.0300113	1.70498
RT1-CE5	RT1 class I, locus CE5	0.0109471	13.7939	0.00905789	15.2704	0.605652	1.5342	0.524746	1.69843
RGD1564046	similar to RIKEN cDNA 4933417K05 gene	0.907745	-1.01611	0.0308438	1.41844	0.254251	1.17837	0.00415468	1.69837
Gpha2	glycoprotein hormone alpha 2	8.82456e-05	-4.71189	0.000956602	-2.96192	0.769948	1.06685	0.0385147	1.69716
Hmgxb4	HMG box domain containing 4	0.270975	1.18135	0.0166463	1.52985	0.0916313	1.31009	0.0056206	1.69657
Hmgxb4	HMG box domain containing 4	0.270975	1.18135	0.0166463	1.52985	0.0916313	1.31009	0.0056206	1.69657
Bst1	bone marrow stromal cell antigen 1	2.36447e-09	-12.5559	3.8518e-09	-10.7954	0.00276248	1.4562	0.000333648	1.69368
Akr1b8	aldo-keto reductase family 1, member B8	0.00302019	7.26319	0.0253751	3.65546	0.0336415	3.35444	0.300161	1.68824
Psat1	phosphoserine aminotransferase 1	2.95323e-06	2.38137	2.49586e-06	2.42809	0.000154949	1.6557	0.000119191	1.68819
Ggta1	Glycoprotein, alpha-galactosyltransferase 1	0.0133628	2.6233	0.00531921	3.17666	0.308454	1.39343	0.124683	1.68736
Eif3k	Eukaryotic translation initiation factor 3, subunit K	0.89436	-1.03046	0.0676148	1.58801	0.893616	1.03068	0.0440225	1.68659
Slc22a4	solute carrier family 22 (organic cation transporter), member 4	3.38699e-05	-7.03289	0.00107924	-3.22947	0.301519	-1.2969	0.0588255	1.67918
Dscr6	Down syndrome critical region homolog 6 (human)	1.03745e-06	-3.60101	8.2351e-06	-2.6512	0.0664716	1.229	0.000749238	1.66929
Wdr34	WD repeat domain 34	0.0877181	-1.79537	0.122476	-1.68146	0.176236	1.56274	0.1273	1.66861
Fam64a	family with sequence similarity 64, member A	0.00161683	2.26839	1.91118e-05	4.82689	0.199935	-1.27811	0.0198274	1.66487
Dullard	Dullard homolog (Xenopus laevis)	0.609311	1.07713	0.4451	1.11875	0.00986236	1.60018	0.00662659	1.662
LOC688280	similar to transmembrane channel-like protein 6 isoform 1	0.0157	-1.23416	0.0105797	-1.25666	6.09102e-05	1.69201	7.80808e-05	1.66171
Heph	hephaestin	1.54731e-06	-10.3181	4.82855e-06	-7.45698	0.360341	1.19819	0.0265418	1.65792
Mybl2	myeloblastosis oncogene-like 2	5.57324e-06	4.12557	8.06592e-07	6.21237	0.495354	1.10043	0.00546993	1.65705
Ccnb1	cyclin B1	1.49204e-05	2.60399	3.1105e-07	4.91453	0.237492	-1.14092	0.00123305	1.6542
Pik3c2b	phosphoinositide-3-kinase, class 2, beta polypeptide	0.0127131	-2.08062	0.0174945	-1.98245	0.083943	1.57224	0.0605003	1.6501
LOC691918	similar to Centrosomal protein of 27 kDa (Cep27 protein)	0.0250153	-1.37026	0.946677	-1.00793	0.130915	1.21249	0.00239679	1.64835
RGD1311723	similar to KIAA1731 protein	0.70404	1.11502	0.368179	1.3017	0.248475	1.41076	0.10879	1.64696
Prkag2	Protein kinase, AMP-activated, gamma 2 non-catalytic subunit	0.754441	-1.0464	0.0956062	1.30293	0.216742	1.20668	0.00747098	1.64517
Asb13	ankyrin repeat and SOCS box-containing 13	0.0226977	-1.5537	0.384271	-1.15502	0.235379	1.22251	0.0130597	1.64449
Nrf1	nuclear respiratory factor 1	0.224424	1.11585	0.00477713	1.37955	0.00909928	1.32931	0.000335457	1.64345
Tecpr2	tectonin beta-propeller repeat containing 2	0.704345	-1.06558	0.0990687	1.35161	0.437704	1.141	0.0152147	1.64333
MBNL2	muscleblind-like 2 (Drosophila)	0.89628	-1.01915	0.54313	1.09366	0.0251215	1.47324	0.00786894	1.64207
Eri2	exoribonuclease 2	0.000151777	-3.13261	0.00354458	-2.00245	0.783911	1.04948	0.0195393	1.6418
Aldh1l2	aldehyde dehydrogenase 1 family, member L2	0.00614663	1.21455	1.37378e-06	1.95494	0.728181	1.01915	1.35359e-05	1.64042
Aspm	asp (abnormal spindle) homolog, microcephaly associated (Drosophila)	0.000543872	1.71047	2.52269e-06	3.1173	0.308147	-1.11109	0.000915657	1.64026
Adrb1	Adrenergic, beta-1-, receptor	4.58374e-05	-6.58162	0.000365557	-4.04245	0.976677	1.00718	0.070485	1.63981
Dsel	dermatan sulfate epimerase-like	0.000127091	7.835	3.28409e-05	12.062	0.842166	1.06348	0.138041	1.63724
RGD1564677	Similar to transcription factor ONECUT2	0.211836	-1.16172	0.864918	1.0196	0.0190324	1.38201	0.00210698	1.63696
LOC302495	hypothetical LOC302495	0.0897501	-1.46516	0.213831	-1.30643	0.0924827	1.45954	0.0375407	1.63688
Rtn4ip1	reticulon 4 interacting protein 1	0.464122	-1.08671	0.148343	1.1889	0.0601888	1.2669	0.00186074	1.63682
Rtn4ip1	reticulon 4 interacting protein 1	0.464122	-1.08671	0.148343	1.1889	0.0601888	1.2669	0.00186074	1.63682
Pcdh20	protocadherin 20	0.787515	-1.02722	0.00679368	1.41712	0.259389	1.12406	0.000916688	1.63627
Siglec5	sialic acid binding Ig-like lectin 5	0.0529713	1.75476	0.00594547	2.50869	0.607515	1.14164	0.0834653	1.63215
Igfbp2	insulin-like growth factor binding protein 2	1.47718e-07	-3.09651	3.41948e-05	-1.73546	0.215449	-1.09375	8.0195e-05	1.63133
Cenpf	centromere protein F	0.00742973	1.45924	1.19935e-05	2.757	0.201196	-1.15946	0.00176439	1.6295
Tecpr2	tectonin beta-propeller repeat containing 2	0.622233	-1.04332	0.0863609	1.17563	0.00901877	1.3278	0.000364915	1.62864
Khdrbs1	KH domain containing, RNA binding, signal transduction associated 1	0.912059	1.01406	0.169301	1.20332	0.0324216	1.37238	0.00405829	1.62851
Mcm5	minichromosome maintenance complex component 5	0.0213857	1.60907	0.000876714	2.35914	0.547139	1.1105	0.0191871	1.62815
Ptprh	protein tyrosine phosphatase, receptor type, H	0.787473	1.12999	0.521326	-1.34176	0.0734211	2.46641	0.299242	1.62673
Rbms3	RNA binding motif, single stranded interacting protein 3	0.970469	1.00542	0.0239584	1.48159	0.508406	1.10287	0.00891424	1.6252
Racgap1	Rac GTPase-activating protein 1	0.0134284	1.53883	3.79303e-05	3.04439	0.181893	-1.22081	0.00764782	1.62055
Caprin1	cell cycle associated protein 1	0.622308	1.07972	0.0685705	1.37018	0.141219	1.27689	0.0121721	1.62039
Stard5	StAR-related lipid transfer (START) domain containing 5	0.593696	1.03634	0.00126934	1.36572	0.0126253	1.22818	6.95863e-05	1.61854
Dna2	DNA replication helicase 2 homolog (yeast)	0.686204	1.0484	0.0288046	1.3499	0.0778097	1.25618	0.00275006	1.61743
Mt1a	metallothionein 1a	5.25593e-07	6.8284	1.25692e-07	10.0664	0.509318	1.09644	0.00696239	1.61637
Rab14	RAB14, member RAS oncogene family	0.973787	-1.00641	0.851618	-1.03707	0.0271358	1.6627	0.0347524	1.61354
ZMYND8	zinc finger, MYND-type containing 8	0.986104	-1.00268	0.142115	1.27494	0.158942	1.26077	0.0126197	1.61172
Fas	Fas (TNF receptor superfamily, member 6)	3.3681e-06	-3.41285	1.84729e-05	-2.65773	0.070619	1.25395	0.00232365	1.61022
RT1-CE12	RT1 class I, locus CE12	0.272621	1.52014	0.123388	1.84437	0.449747	1.32644	0.217528	1.60935
LOC100909941	uncharacterized LOC100909941	0.210551	-1.55875	0.0506209	-2.11574	0.0435821	2.18297	0.183188	1.60828
Rfc5	Replication factor C (activator 1) 5	0.298678	-1.10718	0.0433038	1.2457	0.132451	1.16586	0.000838036	1.60796
Klrg1	killer cell lectin-like receptor subfamily G, member 1	0.720002	1.04608	0.0428778	1.33865	0.0989811	1.25404	0.00454918	1.60477
Lmnb2	Lamin B2	0.296764	1.09875	0.000504409	1.60535	0.311709	1.09539	0.000526268	1.60043
Fam120a	family with sequence similarity 120A	0.841087	1.02053	0.129001	1.18062	0.0109646	1.38139	0.00139261	1.59808
Cyp2c6	cytochrome P450, family 2, subfamily c, polypeptide 6 /// cytochrome P450-like	0.738847	-1.04216	0.0368939	1.34871	0.317835	1.13591	0.00447267	1.5966
Dpyd	dihydropyrimidine dehydrogenase	0.0909986	1.21211	0.00040118	1.78912	0.462827	1.08028	0.00162575	1.59453
Ube3c	Ubiquitin protein ligase E3C	0.914632	-1.02201	0.687169	1.08567	0.102715	1.43693	0.0452177	1.59437
Kif20b	kinesin family member 20B	0.0029617	1.66742	1.75382e-05	3.00891	0.336635	-1.13221	0.00496862	1.59382
Atp6v1g3	ATPase, H+ transporting, lysosomal V1 subunit G3	0.287931	1.13268	0.00857303	1.4603	0.0890372	1.23587	0.00277555	1.59334
Il27ra	interleukin 27 receptor, alpha	0.632704	-1.03677	0.00382806	1.33957	0.096255	1.14678	0.000208329	1.59267
Rbms3	RNA binding motif, single stranded interacting protein 3	0.0265702	-1.26459	0.179471	1.13579	0.272173	1.10746	0.000675647	1.59066
Kif22	kinesin family member 22	0.000160611	1.95561	2.17113e-06	3.34702	0.485421	-1.07654	0.00176105	1.58981
Tmem176b	transmembrane protein 176B	0.0590108	-1.36396	0.0519978	-1.37965	0.00993068	1.60657	0.0112048	1.58829
Mical3	microtubule associated monoxygenase, calponin and LIM domain containing 3 [Rattus norvegicus]	0.28374	1.17131	0.0186105	1.49939	0.159358	1.23803	0.0101395	1.5848
Mical3	microtubule associated monoxygenase, calponin and LIM domain containing 3 [Rattus norvegicus]	0.28374	1.17131	0.0186105	1.49939	0.159358	1.23803	0.0101395	1.5848
zinc finger and SCAN domain containing 10	Zscan10	0.435052	-1.08922	0.0454143	-1.27922	0.00033354	1.8611	0.0022076	1.58467
Hoxc9	Homeobox C9	0.713229	1.05025	0.101833	1.26851	0.0683897	1.31124	0.00727252	1.58374
Krt15	keratin 15	8.37421e-07	19.0848	3.98375e-07	25.7012	0.479086	1.17512	0.0676925	1.58252
Kif13a	Kinesin family member 13A	0.828254	-1.02513	0.0706371	1.25958	0.104341	1.22485	0.00325183	1.58156
Spr	sepiapterin reductase (7,8-dihydrobiopterin:NADP+ oxidoreductase)	0.0135443	1.52046	0.000134288	2.4773	0.820607	-1.03164	0.00884301	1.57934
Tkt	transketolase	5.6803e-05	-4.65672	0.000747302	-2.86613	0.888466	-1.0293	0.0513926	1.57849
H1f0	H1 histone family, member 0	0.16582	-1.11897	0.0102838	1.27885	0.221495	1.10268	0.000263079	1.57792
LOC690769	similar to zinc ring finger protein 1	0.0877685	1.3466	0.0308696	1.49229	0.051265	1.41978	0.018114	1.57338
Mpped1	metallophosphoesterase domain containing 1	0.0063528	-1.84577	0.141796	-1.31328	0.519316	1.1193	0.0266801	1.57314
Kprp	keratinocyte proline-rich protein	0.868275	1.05677	0.609328	1.18703	0.327624	1.39953	0.198189	1.57204
Espl1	extra spindle pole bodies homolog 1 (S. cerevisiae)	0.00017205	2.4793	5.0508e-06	4.38276	0.413149	-1.1264	0.0113811	1.56938
Onecut1	one cut homeobox 1	0.775033	-1.03009	0.0265794	1.31249	0.175651	1.16065	0.00201991	1.56918
Agr2	anterior gradient homolog 2 (Xenopus laevis)	0.602632	1.22293	0.119421	1.91063	0.992762	1.00348	0.260505	1.56778
LOC100360211	hypothetical LOC100360211	0.564105	-1.07784	0.464756	1.10037	0.0557518	1.32133	0.00692721	1.56712
Wwp2	WW domain containing E3 ubiquitin protein ligase 2	0.90977	1.02084	0.0678704	1.45083	0.597975	1.10167	0.0345983	1.5657
Rcc1	regulator of chromosome condensation 1	0.00350561	1.51438	0.000116461	2.02914	0.167742	1.16659	0.00229362	1.56312
Rfc5	replication factor C (activator 1) 5	0.0795686	-1.19755	0.0466073	1.23504	0.556259	1.05668	0.00108945	1.56286
Mcm7	minichromosome maintenance complex component 7	0.000836375	1.95659	0.000120421	2.453	0.127196	1.24639	0.0087084	1.56262
Unc79	unc-79 homolog (C. elegans)	0.743094	-1.04152	0.0726127	1.28111	0.227007	1.16984	0.00591764	1.56092
Hells	helicase, lymphoid specific	0.012104	1.86642	0.000301925	3.22867	0.608518	-1.10855	0.0503567	1.56047
Top2a	topoisomerase (DNA) II alpha	0.000676888	1.56239	4.07945e-06	2.50334	0.754711	-1.02728	0.000693918	1.5597
Klra17 /// LOC100364751 /// LOC497796 /// LOC502907 /// Ly49i5 /// Ly49si1 /// Ly49si2 /// Ly49si3 /// RGD1561306	killer cell lectin-like receptor, subfamily A, member 17 /// immunoreceptor Ly49si3-lik	0.320629	1.20883	0.0582234	1.48527	0.220084	1.26909	0.0381118	1.55931
Nol4	nucleolar protein 4	0.198194	-1.17374	0.75379	-1.03776	0.0230872	1.37719	0.00466458	1.55765
Foxp1	forkhead box P1	0.787581	1.02106	0.00416446	1.34494	0.0553394	1.18248	0.000351908	1.55756
Dut	Deoxyuridine triphosphatase	0.783568	1.05417	0.301743	1.22753	0.158003	1.33539	0.0447449	1.555
Akr1c14	aldo-keto reductase family 1, member C14	0.000332306	-4.60251	0.000513944	-4.17475	0.215496	1.41004	0.122464	1.55451
Il17b	interleukin 17B	0.0268118	2.12727	0.00260325	3.32128	0.984183	-1.00572	0.153491	1.55241
Nrf1	nuclear respiratory factor 1	0.6545	1.06158	0.0640057	1.31808	0.121952	1.24909	0.00918829	1.55089
Chaf1a	chromatin assembly factor 1, subunit A (p150)	0.0765074	1.28482	0.000924655	1.87625	0.640757	1.0616	0.00743878	1.55028
Usp33	Ubiquitin specific peptidase 33	0.759751	1.05372	0.401964	1.15758	0.0711438	1.41039	0.0293333	1.5494
Camk2g	calcium/calmodulin-dependent protein kinase II gamma	0.794415	1.04326	0.0781616	1.37349	0.332692	1.17591	0.0238974	1.54814
Pde3b	phosphodiesterase 3B, cGMP-inhibited	0.685644	1.05868	0.0496434	1.36866	0.223754	1.19616	0.012434	1.54639
Ankrd17	Ankyrin repeat domain 17	0.263179	1.15543	0.0866273	1.26416	0.0205498	1.41281	0.00670451	1.54576
Tcfap2b	transcription factor AP-2 beta	0.305458	1.16225	0.0185386	1.49868	0.223773	1.19854	0.0131974	1.54547
Gnrhr	gonadotropin releasing hormone receptor	0.984812	-1.00258	0.0623754	1.32907	0.294942	1.15871	0.0107854	1.54399
Exo1	exonuclease 1	0.00229502	2.08708	4.85535e-05	3.73957	0.399566	-1.16053	0.0318254	1.54393
Mybl2	myeloblastosis oncogene-like 2	5.53715e-05	2.27674	5.31944e-06	3.10006	0.271762	1.13369	0.00351432	1.54365
Ccnd1	cyclin D1	8.14277e-07	-2.84403	2.1627e-05	-1.96697	0.419389	1.06753	0.000478862	1.54353
Ckap2	cytoskeleton associated protein 2	0.0132847	1.56996	8.84303e-05	2.80786	0.32618	-1.16071	0.0162047	1.54087
Akr1d1	aldo-keto reductase family 1, member D1 (delta 4-3-ketosteroid-5-beta-reductase)	0.0695349	-1.23971	0.674066	1.04579	0.131749	1.18793	0.00295803	1.54013
Ppp6r2	protein phosphatase 6, regulatory subunit 2	0.357105	-1.1656	0.891189	1.02239	0.141917	1.2911	0.0251521	1.53861
Kif18b /// LOC100363850	kinesin family member 18B /// kinesin-like protein KIF18B-like	0.00738729	1.62731	9.35681e-05	2.67184	0.638542	-1.06902	0.0138404	1.53587
Wdhd1	WD repeat and HMG-box DNA binding protein 1	0.0708241	1.30704	0.00118208	1.87948	0.622479	1.06804	0.0102745	1.53581
Xrcc2	X-ray repair complementing defective repair in Chinese hamster cells 2	0.026959	1.25435	4.02006e-05	1.97096	0.786693	-1.02374	0.000918695	1.53486
Ppp1r18	protein phosphatase 1, regulatory subunit 18	7.06592e-05	2.97214	1.42367e-05	3.89035	0.306711	1.17235	0.0187017	1.53454
Lect1	leukocyte cell derived chemotaxin 1	3.58741e-05	-3.11494	2.49645e-06	-5.08186	0.000162556	2.50341	0.0147082	1.53447
Ash1l	Ash1 (absent, small, or homeotic)-like (Drosophila)	0.695964	1.05953	0.19913	1.22111	0.0798322	1.33135	0.0170677	1.53439
Ppp2r2b	protein phosphatase 2 (formerly 2A), regulatory subunit B, beta isoform	0.576919	1.19208	0.111331	1.71718	0.841782	1.06429	0.195027	1.5331
LOC301193 /// LOC363434 /// LOC501251 /// LOC690665 /// LOC691569	similar to Discs large homolog 5 (Placenta and prostate DLG) (Discs large protein P-dlg	0.638481	-1.06479	0.112479	1.25763	0.323812	1.14475	0.0105034	1.53295
Adcy9	adenylate cyclase 9	0.610547	-1.04354	0.00287612	1.40522	0.597845	1.04516	0.000720336	1.53263
Matr3	Matrin 3	0.23187	-1.18818	0.737593	1.04732	0.158877	1.23006	0.0127217	1.5307
Nr2c2	nuclear receptor subfamily 2, group C, member 2	0.168141	-1.20073	0.824297	1.02808	0.113388	1.23932	0.00781984	1.52988
Slc16a1	solute carrier family 16, member 1 (monocarboxylic acid transporter 1)	0.00183583	2.74054	6.61092e-05	5.29615	0.320908	-1.26318	0.0903263	1.52988
Stk39	serine/threonine kinase 39, STE20/SPS1 homolog (yeast)	0.000235431	4.88348	7.71965e-05	6.43929	0.571855	1.16023	0.130234	1.52986
Ces3	Carboxylesterase 3	0.887623	1.01598	0.0375947	1.31048	0.156836	1.185	0.00451139	1.52849
Arhgap39	Rho GTPase activating protein 39	0.308694	1.16016	0.0581488	1.35246	0.0827942	1.3111	0.0145723	1.52843
RT1-CE5	RT1 class I, locus CE5	0.0199427	6.52858	0.00724365	10.1152	0.982312	-1.01492	0.531749	1.52661
Smc3	structural maintenance of chromosomes 3	0.141063	-1.18389	0.420927	-1.09164	0.0107761	1.40722	0.0034853	1.52614
Srgap2	SLIT-ROBO Rho GTPase activating protein 2	0.173322	-1.28073	0.0749286	-1.40317	0.014587	1.67151	0.0340684	1.52566
Troap	trophinin associated protein	0.00414869	1.5794	4.69365e-05	2.49173	0.778212	-1.03415	0.00636507	1.52555
Neurod6	neurogenic differentiation 6	0.54191	-1.07363	0.117689	1.21594	0.202818	1.16732	0.0054098	1.52389
Pold2	polymerase (DNA directed), delta 2, regulatory subunit	0.0880713	1.29831	0.00239793	1.79808	0.501018	1.09936	0.0140747	1.52255
Mme	membrane metallo endopeptidase	0.034145	-2.38639	0.339112	-1.41435	0.770692	-1.1083	0.252771	1.5224
Nol4	nucleolar protein 4 [Rattus norvegicus]	0.765245	-1.05101	0.468879	1.13024	0.162696	1.28095	0.0312804	1.52163
Ncapd2	non-SMC condensin I complex, subunit D2	0.00887354	1.47677	4.97812e-05	2.43818	0.488822	-1.0858	0.00609708	1.52056
Cdca5	cell division cycle associated 5	0.0271652	1.32247	0.000398785	1.82639	0.382567	1.10045	0.00373581	1.51977
PLEKHH2	pleckstrin homology domain containing, family H (with MyTH4 domain) member 2	1.00483e-05	-4.52417	5.41287e-05	-3.31606	0.504843	1.11382	0.0266489	1.51961
NDST3	N-deacetylase/N-sulfotransferase (heparan glucosaminyl) 3	0.550569	-1.04397	0.0225054	1.21499	0.0310657	1.19763	0.000304529	1.51909
Tff1	trefoil factor 1	0.071209	1.3248	0.00929128	1.58505	0.115885	1.26936	0.0149112	1.51873
Wdpcp	WD repeat containing planar cell polarity effector	0.0244717	-1.39819	0.438401	1.10389	0.897204	-1.0163	0.00872724	1.5187
Zmym2	zinc finger, MYM-type 2	0.723042	-1.06834	0.756436	1.0595	0.141711	1.34116	0.0490484	1.51807
Cdk1	cyclin-dependent kinase 1	7.28436e-06	2.30853	2.5303e-07	3.66176	0.604851	-1.04513	0.000941768	1.51769
Gpr61	G protein-coupled receptor 61	0.688131	-1.0603	0.0804102	1.32498	0.599531	1.07991	0.0180411	1.51714
Neo1	Neogenin homolog 1 (chicken)	0.149173	-1.12247	0.467928	1.05671	0.00942785	1.27862	0.000427488	1.51661
Usp49	ubiquitin specific peptidase 49	0.534995	1.07565	0.411214	1.10245	0.0083114	1.47934	0.00604784	1.51619
Nusap1	nucleolar and spindle associated protein 1	0.813452	-1.01706	0.000272755	1.53258	0.692101	-1.0289	0.000327978	1.51495
LOC100912988	uncharacterized LOC100912988	0.0329984	1.45183	0.0116551	1.60222	0.0602948	1.37274	0.020953	1.51494
WIPF1	WAS/WASL interacting protein family, member 1	1.18639e-05	-3.20962	7.31795e-05	-2.47891	0.2341	1.16998	0.0092948	1.51485
Traf4af1	TRAF4 associated factor 1	0.000765841	1.74435	1.38885e-05	2.69183	0.855549	-1.02009	0.00446611	1.51278
Ctsj	cathepsin J	0.791841	-1.01759	0.107811	1.12266	0.00231465	1.32393	0.000193272	1.51248
Auts2l	autism susceptibility candidate 2-like [Rattus norvegicus]	6.20132e-05	-1.60611	0.00174281	-1.33171	0.0067006	1.25318	0.000162388	1.5114
Auts2l	autism susceptibility candidate 2-like [Rattus norvegicus]	6.20132e-05	-1.60611	0.00174281	-1.33171	0.0067006	1.25318	0.000162388	1.5114
Lipogenin	Lipogenin	0.287561	1.16814	0.00519198	1.68067	0.729514	1.05007	0.0164365	1.5108
Gas5	growth arrest specific 5	0.00347299	2.59337	0.000623967	3.54014	0.67523	1.10653	0.114461	1.5105
Hmmr	hyaluronan mediated motility receptor (RHAMM)	0.00229237	1.89186	1.45435e-05	3.85068	0.0714691	-1.35128	0.0222934	1.50626
Car3	carbonic anhydrase 3	0.782339	-1.03449	0.30917	1.13755	0.0714301	1.27957	0.00871063	1.50579
Zfp64	zinc finger protein 64	0.0184483	-1.23639	0.934711	1.0061	0.0292915	1.20999	0.000463413	1.50514
Dhx37	DEAH (Asp-Glu-Ala-His) box polypeptide 37	0.382311	1.19159	0.0832477	1.45522	0.302527	1.23239	0.0631821	1.50505
Otx2	orthodenticle homeobox 2	0.916634	-1.01283	0.0511888	1.31035	0.318322	1.13377	0.00852841	1.50469
Thoc4	THO complex 4	0.000410781	1.82604	3.68765e-05	2.34436	0.165748	1.17194	0.00437628	1.5046
Lsm2	LSM2 homolog, U6 small nuclear RNA associated (S. cerevisiae)	0.00116514	1.65682	2.57638e-05	2.4184	0.775962	1.03068	0.0040661	1.50444
Gtse1	G-2 and S-phase expressed 1	0.0271169	1.30798	5.03778e-05	2.18177	0.32881	-1.10898	0.00342084	1.50412
RT1-CE5	RT1 class I, locus CE5	0.00371511	3.66151	0.00443785	3.51515	0.19996	1.56571	0.239828	1.50312
Prdm15	PR domain containing 15	0.0814295	1.31149	0.0127016	1.54466	0.110893	1.27616	0.017212	1.50305
Actr2	ARP2 actin-related protein 2 homolog (yeast)	0.00757645	1.684	0.0196683	1.53351	0.0092713	1.65031	0.0242993	1.50283
Hjurp	Holliday junction recognition protein	0.000666469	1.7611	2.0101e-05	2.55327	0.743146	1.03637	0.00476652	1.50255
LOC100911534	uncharacterized LOC100911534	0.000471397	2.14078	0.000105413	2.58306	0.141246	1.24509	0.0162881	1.50232
Tacc3	transforming, acidic coiled-coil containing protein 3	3.42838e-06	2.49972	1.22871e-07	4.0996	0.309483	-1.09213	0.00104466	1.50167
Ndc80	NDC80 homolog, kinetochore complex component (S. cerevisiae)	0.133508	1.27694	0.00205836	1.92659	0.974518	-1.00484	0.0240614	1.5015
Sv2b	synaptic vesicle glycoprotein 2b	0.00121519	-2.01798	0.0006672	-2.16428	0.0107125	1.60884	0.0224234	1.50008
Kifc1	kinesin family member C1	1.22381e-05	2.32107	5.76109e-07	3.52375	0.894658	-1.01216	0.00179346	1.49991
H2afx	H2A histone family, member X	0.000374882	1.53286	2.02353e-06	2.41107	0.524654	-1.04961	0.000536111	1.49858
LOC100362555	androgen down regulated in mouse prostate	0.0247339	-2.12796	0.0148936	-2.33003	0.109103	1.63806	0.179413	1.496
Cldn10	claudin 10	0.00908674	2.14617	0.00104965	3.05571	0.836428	1.04878	0.110287	1.49325
Depdc1	DEP domain containing 1	0.00351429	1.53732	1.14717e-05	2.74894	0.122655	-1.19928	0.00528456	1.49101
Tacr2	tachykinin receptor 2	4.28714e-07	-42.0531	9.34698e-07	-29.3664	0.879318	1.04041	0.1533	1.48988
Top2a	topoisomerase (DNA) II alpha	0.00244842	1.54619	1.95061e-05	2.44873	0.55616	-1.06348	0.0040948	1.48919
Gramd1b	GRAM domain containing 1B	6.93e-05	-2.62762	0.000827583	-1.95264	0.457315	1.10583	0.0149857	1.48809
Anp32e	acidic (leucine-rich) nuclear phosphoprotein 32 family, member E	6.06767e-05	1.5046	6.15377e-07	2.1274	0.387995	1.05002	7.68327e-05	1.48465
Dlgap5	discs, large (Drosophila) homolog-associated protein 5	0.0604578	1.256	0.000117101	2.06764	0.351044	-1.10886	0.00533758	1.48459
Asns	asparagine synthetase	0.000118995	3.10943	6.75048e-05	3.41968	0.104443	1.34866	0.0422793	1.48323
Cpt1a	carnitine palmitoyltransferase 1a, liver	0.00116974	-2.72786	0.0121969	-1.93047	0.827014	1.04717	0.0911712	1.47971
Yars	tyrosyl-tRNA synthetase	4.01428e-06	1.93082	4.04363e-07	2.42967	0.0268674	1.17479	0.000175897	1.47831
Zfhx3	zinc finger homeobox 3	3.9405e-05	-2.30328	3.99307e-05	-2.29976	0.00533754	1.47598	0.00522547	1.47824
Bub1	budding uninhibited by benzimidazoles 1 homolog (S. cerevisiae)	0.000103873	1.99221	2.37205e-06	3.16626	0.474284	-1.07581	0.00389844	1.47732
Susd4	sushi domain containing 4	1.6842e-06	-8.90178	3.44551e-06	-7.31529	0.307259	1.21226	0.0587685	1.47517
Foxe1	forkhead box E1 (thyroid transcription factor 2)	0.00133127	-1.95408	6.5675e-05	-2.86208	0.000551219	2.15998	0.0235003	1.47472
Ska1	spindle and kinetochore associated complex subunit 1	4.23209e-05	2.37446	1.53249e-06	3.85578	0.38935	-1.10291	0.00704021	1.47233
Dlg1	discs, large homolog 1 (Drosophila)	0.423678	-1.129	0.0856864	-1.32584	0.0052538	1.72728	0.0278832	1.47084
Dlg1	discs, large homolog 1 (Drosophila)	0.423678	-1.129	0.0856864	-1.32584	0.0052538	1.72728	0.0278832	1.47084
LOC680211	hypothetical protein LOC680211	0.00287401	-2.87704	0.0175938	-2.10525	0.779677	1.07495	0.162199	1.46903
Bub1b	budding uninhibited by benzimidazoles 1 homolog, beta (S. cerevisiae)	0.00281907	1.8176	3.2485e-05	3.23224	0.208593	-1.2123	0.0261755	1.46688
RGD1305464	similar to human chromosome 15 open reading frame 39	0.00220964	1.78684	0.000145571	2.42258	0.566806	1.08149	0.0193457	1.46628
Slc6a6	solute carrier family 6 (neurotransmitter transporter, taurine), member 6	0.00350174	-2.06252	0.0010044	-2.44102	0.0144198	1.73521	0.0627835	1.46616
Vwf	von Willebrand factor	3.46373e-06	-2.96332	5.00478e-06	-2.8141	0.00900052	1.39154	0.00416307	1.46533
Kif15	kinesin family member 15	0.00658868	1.53188	0.000133731	2.22601	0.946746	1.00811	0.0115534	1.46491
Racgap1	Rac GTPase-activating protein 1	0.000963641	1.57068	4.16857e-06	2.66119	0.140692	-1.1567	0.00266229	1.46476
Prc1	protein regulator of cytokinesis 1	0.000455402	1.75193	5.82146e-06	2.81473	0.356369	-1.1011	0.00495016	1.45912
Fam83d	family with sequence similarity 83, member D	0.000270566	2.03488	3.59415e-06	3.64236	0.113317	-1.22752	0.0113322	1.4582
Eftud2	elongation factor Tu GTP binding domain containing 2	0.00330574	1.52294	9.70287e-05	2.07213	0.518455	1.07124	0.00606281	1.45755
Nop58	nucleolar protein NOP58	0.00102799	1.54646	2.31184e-05	2.13513	0.57787	1.05167	0.00263882	1.452
Blm	Bloom syndrome, RecQ helicase-like	0.00216957	1.67929	3.44255e-05	2.62582	0.543076	-1.07698	0.0127404	1.45189
Uhrf1	ubiquitin-like with PHD and ring finger domains 1	0.00205988	1.73879	9.57581e-05	2.42279	0.754702	1.04075	0.0168401	1.45016
Mecom	MDS1 and EVI1 complex locus	0.00327625	4.79906	0.00386102	4.58793	0.30448	1.51616	0.356445	1.44946
RGD1308195	similar to secreted Ly6/uPAR related protein 2	0.000374754	-5.3361	0.00130215	-3.96915	0.800979	1.07719	0.230517	1.44817
RGD1561367	similar to Anillin	0.00151966	1.74195	1.46253e-05	2.98885	0.187127	-1.18524	0.0138024	1.44765
NPR3	natriuretic peptide receptor C/guanylate cyclase C (atrionatriuretic peptide receptor C)	3.22352e-08	-4.61884	2.39485e-05	-1.90672	0.000115606	-1.67851	0.00113518	1.44318
Ncaph	non-SMC condensin I complex, subunit H	0.00108013	1.69559	3.19816e-05	2.42462	0.952227	1.00658	0.00889535	1.43936
Nolc1	nucleolar and coiled-body phosphoprotein 1	1.15989e-06	3.27128	1.99225e-07	4.42937	0.523083	1.06275	0.00398839	1.43898
Spag5	sperm associated antigen 5	0.00146369	1.93329	4.75415e-05	3.00268	0.596286	-1.07973	0.0309253	1.43846
Sf3b3	splicing factor 3b, subunit 3	0.0050418	1.35968	2.19723e-05	2.02597	0.67166	-1.03595	0.00193211	1.43832
App	amyloid beta (A4) precursor protein	0.00388568	-1.85421	0.00191656	-2.00913	0.0205698	1.55735	0.0461886	1.43726
Ikzf2	IKAROS family zinc finger 2	0.817043	1.05378	0.72335	-1.08366	0.0538065	1.6404	0.13689	1.4365
Lrmp	lymphoid-restricted membrane protein	0.00976188	1.50418	0.000295411	2.08835	0.791727	1.03361	0.0175199	1.43504
Car8	carbonic anhydrase 8	0.041005	1.70256	0.00735321	2.18053	0.619886	1.11944	0.138126	1.43371
RGD1560691	similar to calcium/calmodulin-dependent protein kinase 1D	0.00373323	-1.54803	0.000209042	-1.99812	0.000466918	1.84764	0.0105951	1.43144
Cx3cl1	chemokine (C-X3-C motif) ligand 1	0.000645493	-2.3852	0.000533875	-2.44766	0.0446755	1.46636	0.0574014	1.42894
IgG-2a /// Igha /// LOC100360169 /// LOC100360329 /// LOC100360822 /// LOC100362271 /// LOC678969 /// LOC686380 /// RGD1565478	gamma-2a immunoglobulin heavy chain /// immunoglobulin heavy chain, alpha /// rCG21044-	0.945533	1.01358	0.831329	-1.04302	0.0635192	1.50979	0.0996206	1.42812
Psph	phosphoserine phosphatase	0.00325879	1.52463	5.03875e-05	2.22361	0.833742	-1.02234	0.00824012	1.42659
Ube2c	ubiquitin-conjugating enzyme E2C	3.70582e-05	1.89945	3.37241e-07	3.30773	0.0311228	-1.22705	0.00209477	1.41919
Sft2d3	SFT2 domain containing 3	0.412006	-1.1554	0.173369	-1.28334	0.0260488	1.57587	0.0693968	1.41877
Slc1a5	solute carrier family 1 (neutral amino acid transporter), member 5	6.37107e-07	8.67215	3.2179e-07	10.5841	0.357542	1.16186	0.0526716	1.41801
Sorbs2	sorbin and SH3 domain containing 2	0.000409148	-3.31316	7.2183e-05	-4.67557	0.0100414	2.00061	0.130024	1.41766
RT1-N3	RT1 class Ib, locus N3	0.0277917	1.78678	0.00202711	2.64168	0.849809	-1.04322	0.145647	1.41721
Inpp5f	inositol polyphosphate-5-phosphatase F	0.0230248	-1.56946	0.0113195	-1.69185	0.0300874	1.52645	0.0623378	1.41602
LOC500420	similar to CG12279-PA	3.53029e-05	4.03542	2.37311e-06	7.42606	0.159095	-1.30072	0.0746108	1.41477
Trim59	tripartite motif-containing 59	0.00938132	1.49206	2.9479e-05	2.70347	0.0687482	-1.28079	0.0185338	1.41468
Rad51	RAD51 homolog (RecA homolog, E. coli) (S. cerevisiae)	0.0113004	1.48656	0.000321321	2.06974	0.903964	1.0152	0.0212489	1.41346
Fancd2	Fanconi anemia, complementation group D2	3.21823e-05	1.94326	1.22436e-06	2.79538	0.823661	-1.0185	0.00248874	1.41237
Bysl	bystin-like	0.000377374	1.6338	1.55524e-05	2.16359	0.469639	1.06562	0.00337614	1.41116
Mcm4	minichromosome maintenance complex component 4	0.00119335	1.65756	9.41943e-05	2.09707	0.32579	1.11399	0.0104245	1.40937
Krt19	keratin 19	0.0218837	2.81361	0.00797303	3.59348	0.795687	1.10251	0.375272	1.4081
Orc1l	origin recognition complex, subunit 1-like (yeast)	0.00247207	2.23831	9.99055e-05	3.74877	0.373434	-1.19117	0.103619	1.40604
Tspan5	tetraspanin 5	0.707653	1.06903	0.0986257	-1.37839	0.00287159	2.06824	0.0838256	1.40358
Rrm2	ribonucleotide reductase M2	0.000542677	1.87145	4.07252e-05	2.49079	0.651763	1.05438	0.0170908	1.40332
Cdca8	cell division cycle associated 8	7.75019e-05	2.03204	2.38818e-06	3.11534	0.378661	-1.09363	0.00788024	1.40186
Atp1b3	ATPase, Na+/K+ transporting, beta 3 polypeptide	0.976056	1.00891	0.452253	-1.25416	0.080625	1.77358	0.272623	1.40167
Ccdc99	coiled-coil domain containing 99	4.15783e-05	2.2689	5.55729e-06	2.93388	0.466628	1.08084	0.0110022	1.39762
Ercc6l	excision repair cross-complementing rodent repair deficiency complementation group 6 -	0.00247436	1.77454	4.19504e-05	2.89455	0.273344	-1.16811	0.0354017	1.39641
Ccna2	cyclin A2	8.60597e-06	2.49512	1.90345e-07	4.5021	0.0220894	-1.29615	0.00686835	1.39209
Snx8	sorting nexin 8	0.00013403	-2.69116	0.000103229	-2.79471	0.0347998	1.44493	0.0522381	1.39139
Nup85	nucleoporin 85	0.000325923	1.77091	1.49802e-05	2.41905	0.852813	1.01844	0.00853986	1.39119
Ccnd1	cyclin D1	1.60538e-07	-2.8549	1.29242e-06	-2.22823	0.230246	1.08454	0.000760245	1.38955
Shcbp1	Shc SH2-domain binding protein 1	6.91366e-06	3.65572	3.76554e-07	6.66894	0.0625316	-1.31358	0.0314246	1.38876
RGD1564964	similar to WD repeat domain 11 protein	0.00645101	-2.02244	0.00252258	-2.30217	0.0449818	1.58005	0.12726	1.38806
Birc5	baculoviral IAP repeat-containing 5	2.727e-05	2.32205	1.34974e-06	3.51859	0.399961	-1.09168	0.0104967	1.38803
Melk	maternal embryonic leucine zipper kinase	0.0102145	1.54387	6.95586e-05	2.6494	0.139952	-1.23736	0.0360252	1.38689
Tsga14	testis specific, 14	1.43339e-06	-8.1125	7.79468e-06	-5.33314	0.590625	-1.09716	0.0837812	1.38644
Kif4	kinesin family member 4	0.00139992	1.80526	2.09862e-05	2.98829	0.187102	-1.19539	0.0301177	1.38475
Cenpk	centromere protein K	0.00763955	1.48741	0.00011199	2.19491	0.583064	-1.06628	0.0200263	1.38393
Zwilch	Zwilch, kinetochore associated, homolog (Drosophila)	1.52237e-05	2.45154	7.70291e-07	3.78277	0.291909	-1.11567	0.0101894	1.38304
Steap2	six transmembrane epithelial antigen of the prostate 2	0.000178047	3.52735	0.00106546	2.6119	0.0117526	1.86765	0.130434	1.38294
Depdc1b	DEP domain containing 1B	0.000749659	1.75691	2.49109e-05	2.5175	0.740659	-1.03728	0.0164346	1.38141
Cdca2	cell division cycle associated 2	0.00380595	1.7393	9.88562e-05	2.66524	0.469016	-1.11013	0.0470472	1.38035
Hmmr	hyaluronan mediated motility receptor (RHAMM)	0.000603889	2.25739	1.70634e-05	3.88864	0.172254	-1.25066	0.064195	1.37737
Gins4	GINS complex subunit 4 (Sld5 homolog)	3.65924e-05	2.02814	1.67057e-06	2.91361	0.638533	-1.043	0.00593843	1.37736
Smc2	structural maintenance of chromosomes 2	0.000497647	1.71583	4.32054e-06	2.85995	0.0816023	-1.21077	0.0104112	1.37665
Asf1b	ASF1 anti-silencing function 1 homolog B (S. cerevisiae)	0.00022766	2.02094	9.20455e-06	3.00744	0.496378	-1.08255	0.0211922	1.37467
Gprc5b	G protein-coupled receptor, family C, group 5, member B	0.0131974	1.66086	0.00163654	2.1061	0.629241	1.08365	0.0822958	1.37415
Tox	thymocyte selection-associated high mobility group box	0.000668156	-2.96461	0.002855	-2.35575	0.680007	1.09042	0.156391	1.37225
Mcm6	minichromosome maintenance complex component 6	0.00131895	2.07229	0.000207159	2.63416	0.627871	1.07914	0.0698625	1.37173
Ect2	epithelial cell transforming sequence 2 oncogene	0.0152784	1.60839	0.000218117	2.67421	0.247976	-1.21253	0.075497	1.37124
Asph	aspartate-beta-hydroxylase	0.00165439	-2.54641	0.0139769	-1.87786	0.957496	1.01113	0.155369	1.3711
Slc7a5	solute carrier family 7 (cationic amino acid transporter, y+ system), member 5	0.011163	1.85056	0.00421284	2.09932	0.342401	1.2084	0.131136	1.37084
Nup210	nucleoporin 210	0.000451666	2.21329	1.45408e-05	3.65179	0.215362	-1.20607	0.0545372	1.36803
H2afx	H2A histone family, member X	0.0011625	1.53511	9.16539e-06	2.36799	0.204026	-1.12801	0.00704775	1.3675
Bhlhe41	basic helix-loop-helix family, member e41	2.99026e-06	-18.0302	1.5942e-05	-10.1031	0.318672	-1.30699	0.251136	1.36544
Eef2k	eukaryotic elongation factor-2 kinase	6.44344e-07	-2.2183	3.71289e-06	-1.8845	0.0312124	1.15959	0.000586669	1.36498
Mark1	MAP/microtubule affinity-regulating kinase 1	0.00051327	1.74358	3.40684e-05	2.27668	0.668854	1.0451	0.0140417	1.36464
CCNF	cyclin F	0.00272358	1.75522	7.06541e-05	2.67886	0.418535	-1.11892	0.0462306	1.36401
Cad	carbamoyl-phosphate synthetase 2, aspartate transcarbamylase, and dihydroorotase	1.7413e-05	2.58003	3.10301e-06	3.29895	0.557971	1.06592	0.0180035	1.36293
Syne1	spectrin repeat containing, nuclear envelope 1	0.00143857	-2.05279	0.0107258	-1.64959	0.566435	1.09468	0.0752936	1.36224
Mybbp1a	MYB binding protein (P160) 1a	7.92735e-05	2.10463	9.47236e-06	2.70871	0.59442	1.05767	0.0158268	1.36125
Pprc1	peroxisome proliferator-activated receptor gamma, coactivator-related 1	0.000217579	1.71267	3.58321e-06	2.58151	0.257923	-1.10849	0.00664273	1.35978
Cct8	chaperonin containing Tcp1, subunit 8 (theta)	1.83073e-06	1.98035	1.04478e-07	2.68911	0.981076	1.00137	0.000567099	1.35975
Tubb5	tubulin, beta 5	2.10052e-07	2.57395	3.2705e-08	3.31656	0.385009	1.05503	0.000757795	1.35942
HMGA1	high mobility group AT-hook 1	1.03124e-05	2.8713	1.45833e-06	3.92134	0.961837	-1.00536	0.022173	1.35842
Gar1	GAR1 ribonucleoprotein homolog (yeast)	8.81133e-05	1.68609	3.69148e-06	2.23681	0.759488	1.02309	0.00284211	1.35726
Rbak	RB-associated KRAB zinc finger	0.00158552	-3.06181	0.00470896	-2.52652	0.650065	1.11931	0.238223	1.35646
Ccdc34	coiled-coil domain containing 34	0.0668575	1.30302	0.000205002	2.22891	0.100058	-1.26132	0.0405721	1.35618
Ccnb2	cyclin B2	2.59848e-05	2.23922	7.04584e-07	3.6744	0.0749679	-1.21157	0.011987	1.35438
Adssl1	adenylosuccinate synthase like 1	4.56295e-05	4.55002	6.74934e-06	7.13354	0.460213	-1.1593	0.151825	1.35237
E2f8	E2F transcription factor 8	1.91916e-05	3.19971	5.58177e-06	3.94786	0.504541	1.09497	0.0491604	1.35099
Cxcl14	chemokine (C-X-C motif) ligand 14	1.53997e-08	-45.9708	3.88106e-08	-30.0865	0.483547	-1.13232	0.114419	1.34941
TSGA14	testis specific, 14	1.65982e-06	-7.5157	9.93712e-06	-4.91066	0.456632	-1.13557	0.103655	1.34777
Ppan	peter pan homolog (Drosophila)	0.000373087	1.71665	2.23387e-05	2.24188	0.742019	1.03186	0.0118453	1.34756
Nqo1	NAD(P)H dehydrogenase, quinone 1	6.57699e-06	-2.75278	9.69247e-06	-2.61538	0.0356427	1.28007	0.0159143	1.34732
Mrpl12	mitochondrial ribosomal protein L12	3.92361e-05	1.89213	3.01923e-06	2.46198	0.678088	1.0344	0.00536779	1.34593
Cxcl10	chemokine (C-X-C motif) ligand 10	0.0293558	1.70567	0.00205209	2.46875	0.719058	-1.07805	0.182184	1.34259
LOC100360406	rCG34104-like	3.06839e-05	1.86405	3.8223e-06	2.28051	0.248718	1.09661	0.00415407	1.34162
Atp2a2	ATPase, Ca++ transporting, cardiac muscle, slow twitch 2	0.000143758	2.31537	4.26211e-05	2.71044	0.305072	1.14581	0.0456711	1.34132
Mcm3	minichromosome maintenance complex component 3	0.00204621	1.71428	0.000316845	2.06165	0.394679	1.11419	0.0409267	1.33996
Csrp2	cysteine and glycine-rich protein 2	0.00378976	-2.70075	0.00196363	-3.0438	0.133084	1.51016	0.269313	1.33995
LOC500700	similar to chromosome 14 open reading frame 145	0.00411279	1.46216	1.66619e-05	2.39542	0.0682826	-1.22323	0.0157308	1.33931
Ruvbl2	RuvB-like 2 (E. coli)	2.21644e-06	2.09995	2.38361e-07	2.69361	0.50963	1.04379	0.00154259	1.33886
Shmt1	serine hydroxymethyltransferase 1 (soluble)	8.01567e-05	-2.01687	0.156705	-1.16094	0.0258394	-1.29783	0.0157223	1.3386
Tcea3	transcription elongation factor A (SII), 3	2.08223e-07	-3.01938	3.08085e-07	-2.85983	0.00848709	1.26608	0.00274613	1.33671
Kif2c	kinesin family member 2C	0.0603043	1.44367	0.000503957	2.56631	0.127962	-1.33004	0.122466	1.33653
Id1	inhibitor of DNA binding 1	0.000553602	3.29982	0.000647597	3.20684	0.178346	1.37506	0.216129	1.33632
RGD1565096	Similar to TSG118.1	0.00576517	1.38298	3.2741e-05	2.06095	0.24158	-1.11612	0.0104176	1.33519
Ptgs1	prostaglandin-endoperoxide synthase 1	8.50981e-05	2.36597	1.48633e-06	4.42921	0.0209564	-1.40326	0.0406697	1.33407
Ptafr	platelet-activating factor receptor	0.00172663	1.45382	5.29687e-06	2.37242	0.0376778	-1.22358	0.00751745	1.33366
LOC500013	similar to sterile alpha motif domain containing 9-like	0.00744474	-2.26055	0.707158	-1.09342	0.092262	-1.55041	0.245013	1.33346
Kif11	kinesin family member 11	0.000241324	1.70615	2.91202e-06	2.67152	0.0953478	-1.17489	0.00979615	1.33274
Hs3st3b1	heparan sulfate (glucosamine) 3-O-sulfotransferase 3B1 [Rattus norvegicus]	1.71162e-07	-25.1609	5.476e-07	-16.0661	0.426493	-1.17619	0.177671	1.33149
RGD1308396	similar to chromosome 14 open reading frame 21	0.000906424	1.83456	4.00843e-05	2.60996	0.590277	-1.06872	0.0422356	1.33119
Steap1	six transmembrane epithelial antigen of the prostate 1	0.000244325	4.00241	0.00144865	2.86554	0.023442	1.85764	0.234358	1.32998
Polr1e	polymerase (RNA) I polypeptide E	0.000191698	1.86088	1.11658e-05	2.51802	0.859172	-1.01771	0.017783	1.32959
Aaas	achalasia, adrenocortical insufficiency, alacrimia (Allgrove, triple-A)	4.69812e-05	1.82996	6.9344e-07	2.88896	0.0543859	-1.18751	0.00577573	1.32942
LOC100912041	uncharacterized LOC100912041	0.00586252	1.65695	0.00032801	2.25358	0.869074	-1.02337	0.0693647	1.32903
Chaf1b	chromatin assembly factor 1, subunit B (p60)	0.00769402	1.50044	0.00023617	2.05841	0.788282	-1.0324	0.0383771	1.32881
Casp4	caspase 4, apoptosis-related cysteine peptidase	0.00382722	2.22414	0.00851667	1.99049	0.0821655	1.48414	0.191042	1.32823
Tars	threonyl-tRNA synthetase	2.89015e-06	2.25556	1.26167e-06	2.47621	0.0270329	1.20975	0.00381525	1.32809
LOC100910632	uncharacterized LOC100910632	1.84009e-05	-2.69815	8.31882e-05	-2.23728	0.411077	1.10026	0.0332722	1.32691
Ccnd1	cyclin D1	3.26923e-06	-2.43412	4.64898e-05	-1.86168	0.855647	1.01483	0.00689007	1.32688
Ttk	Ttk protein kinase	0.000302129	1.99176	1.00858e-05	3.03669	0.255819	-1.14927	0.0377458	1.3266
Cenpn	centromere protein N	3.17275e-05	2.01055	2.80754e-06	2.63115	0.886711	1.01236	0.00981898	1.32485
POLE	polymerase (DNA directed), epsilon	0.00228857	1.62148	0.000121884	2.13914	0.97087	1.00415	0.0336696	1.32473
Aldh18a1	aldehyde dehydrogenase 18 family, member A1	2.68018e-05	2.28568	1.54271e-05	2.43832	0.0553545	1.24168	0.0195887	1.3246
Znf593	zinc finger protein 593	1.12676e-05	2.14819	4.56205e-07	3.20826	0.16918	-1.12753	0.0076341	1.32455
Tubb5	tubulin, beta 5	0.000425941	1.80154	2.44938e-05	2.42535	0.874721	-1.01679	0.0252598	1.32404
Dhrs1	dehydrogenase/reductase (SDR family) member 1	2.32044e-07	3.746	1.90906e-07	3.87367	0.0172308	1.2801	0.00935705	1.32373
Nup107	nucleoporin 107	0.00024597	1.51598	4.53749e-06	2.06214	0.69182	-1.02775	0.0029551	1.32355
LOC498872	similar to MGC108823 protein	0.291482	1.98527	0.102405	3.06411	0.806041	-1.16663	0.657127	1.32297
Vrk1	vaccinia related kinase 1	0.000695304	1.52922	1.65448e-05	2.06925	0.779543	-1.0233	0.0079431	1.32233
LOC304558	similar to TPR repeat-containing protein KIAA1043	9.89048e-05	-2.47159	0.000346688	-2.12428	0.343469	1.13628	0.0589691	1.32205
Ndufaf4	NADH dehydrogenase (ubiquinone) 1 alpha subcomplex, assembly factor 4	0.000829834	1.54099	1.97054e-05	2.10275	0.709896	-1.03263	0.010127	1.32143
Cks2	CDC28 protein kinase regulatory subunit 2	2.63081e-05	2.07425	1.72053e-06	2.85859	0.630814	-1.0434	0.0113237	1.32081
Gria2	glutamate receptor, ionotropic, AMPA 2	0.000481413	-3.56479	0.000212553	-4.20557	0.0844691	1.55734	0.252127	1.32006
Hspa4	heat shock protein 4	0.0120973	1.35361	0.152036	1.1601	0.00174756	1.54006	0.0181777	1.31989
Ccnb1	cyclin B1	1.54349e-06	3.04344	9.17378e-08	4.96374	0.044079	-1.2362	0.0142445	1.31933
Atp2a3	ATPase, Ca++ transporting, ubiquitous	0.000880602	-2.42044	0.00377644	-1.99945	0.632464	1.08918	0.14626	1.31851
Foxm1	forkhead box M1	0.00032412	1.8948	2.63476e-05	2.49426	0.99057	1.0013	0.0320183	1.31808
Hist3h2ba	histone cluster 3, H2ba	0.0257804	1.40968	0.000199398	2.24816	0.165974	-1.21117	0.0600104	1.31674
Aurkb	aurora kinase B	1.6261e-05	2.01251	7.31271e-07	2.86931	0.326879	-1.08299	0.00696464	1.31648
Cks1b	CDC28 protein kinase regulatory subunit 1B	3.87234e-05	1.85343	3.88194e-06	2.32048	0.535766	1.0503	0.0068843	1.31497
Rasgrf1	RAS protein-specific guanine nucleotide-releasing factor 1	0.000671879	-1.49974	5.9287e-06	-2.20825	2.27993e-05	1.93612	0.00672839	1.31492
Snrpa	small nuclear ribonucleoprotein polypeptide A	9.3208e-05	1.83148	5.42533e-06	2.44295	0.866701	-1.01469	0.0116933	1.31456
Peli2	Pellino 2	0.00164628	-2.52597	0.000807239	-2.82761	0.0887991	1.47108	0.207694	1.31415
Il33	interleukin 33	1.62226e-05	6.59133	0.000145888	4.00617	0.00568534	2.16	0.222481	1.31283
Trim14	tripartite motif-containing 14	9.75223e-06	-3.58377	8.00625e-05	-2.60019	0.717091	-1.05003	0.0698316	1.3126
Pop1	processing of precursor 1, ribonuclease P/MRP subunit (S. cerevisiae)	6.98998e-05	1.90483	3.18808e-06	2.66398	0.481542	-1.06556	0.0133752	1.3125
Zfp462	zinc finger protein 462	3.10096e-06	-4.57433	5.60228e-06	-4.0793	0.270995	1.17031	0.0752616	1.31233
FHOD3	formin homology 2 domain containing 3	1.132e-08	-27.2126	2.69862e-08	-19.2794	0.614093	-1.07643	0.0897141	1.31126
Fcgr2a	Fc fragment of IgG, low affinity IIa, receptor (CD32) /// Low affinity immunoglobulin g	1.56431e-06	14.101	4.62947e-07	22.1926	0.413115	-1.20042	0.236434	1.31106
Rrs1	RRS1 ribosome biogenesis regulator homolog (S. cerevisiae)	5.8507e-05	1.68755	7.22138e-07	2.56582	0.0604768	-1.16045	0.00414476	1.31021
Nup160	nucleoporin 160	0.000679387	1.65002	3.72694e-05	2.14758	0.945421	1.00662	0.0201866	1.31017
Ddx21	DEAD (Asp-Glu-Ala-Asp) box polypeptide 21	7.52104e-05	1.72899	4.26077e-06	2.24691	0.920777	1.00761	0.00649135	1.30944
Naaladl2	N-acetylated alpha-linked acidic dipeptidase-like 2	1.58527e-07	-2.22463	2.37107e-06	-1.75619	0.505816	1.03368	0.000471074	1.3094
Naaladl2	N-acetylated alpha-linked acidic dipeptidase-like 2	1.58527e-07	-2.22463	2.37107e-06	-1.75619	0.505816	1.03368	0.000471074	1.3094
Kcnj3	potassium inwardly-rectifying channel, subfamily J, member 3	7.78661e-07	-6.03206	4.15204e-06	-4.23455	0.531188	-1.08967	0.0754552	1.30726
Umps	uridine monophosphate synthetase	0.000607172	1.65763	1.57225e-05	2.34688	0.4135	-1.08324	0.0202473	1.30702
Stip1	stress-induced phosphoprotein 1	0.00110379	1.76492	7.90794e-05	2.32275	0.944276	-1.00829	0.0483964	1.30525
Nup93	nucleoporin 93	7.19194e-06	2.2239	1.1737e-06	2.75931	0.539911	1.05132	0.00936512	1.30443
Gpatch4	G patch domain containing 4	0.00042238	1.79463	1.05347e-05	2.67957	0.219377	-1.14478	0.0307394	1.30428
Shmt2	serine hydroxymethyltransferase 2 (mitochondrial)	0.000258225	1.8662	2.62916e-05	2.36986	0.809361	1.02539	0.0303995	1.30213
Traip	TRAF-interacting protein	0.00770981	1.53802	0.00019006	2.20574	0.449293	-1.10181	0.0625213	1.30162
Mad2l1	MAD2 mitotic arrest deficient-like 1 (yeast)	0.000142762	2.21212	3.40936e-06	3.76148	0.0520596	-1.3068	0.0551205	1.3012
Nuf2	NUF2, NDC80 kinetochore complex component, homolog (S. cerevisiae)	0.000169711	1.81876	4.47063e-06	2.68419	0.192206	-1.13781	0.0208504	1.29708
Akr1c14	aldo-keto reductase family 1, member C14	0.000533977	-6.08727	0.000587583	-5.92866	0.493367	1.26251	0.44737	1.29629
Bcl3	B-cell CLL/lymphoma 3	0.0198691	1.64696	0.00341048	2.02628	0.772282	1.05284	0.170889	1.29532
Whsc1	Wolf-Hirschhorn syndrome candidate 1 (human)	1.77727e-05	3.24159	3.97083e-06	4.21053	0.981303	-1.00315	0.0819537	1.29483
Cxxc5	CXXC finger 5	0.000213083	-2.24814	0.000872361	-1.92304	0.444464	1.10748	0.0762717	1.29471
LOC100912749	uncharacterized LOC100912749	1.96146e-05	3.72027	6.35567e-06	4.61396	0.779043	1.04362	0.117576	1.29432
Chtf18	CTF18, chromosome transmission fidelity factor 18 homolog (S. cerevisiae)	3.21114e-05	2.03957	1.30793e-06	2.98329	0.18926	-1.13033	0.0165816	1.29406
Mca32	mast cell antigen 32	2.19692e-05	-6.54685	0.000113011	-4.45941	0.570118	-1.13487	0.262693	1.29362
LOC360228	WDNM1 homolog	0.564838	1.22721	0.0267607	2.51742	0.213242	-1.58588	0.472045	1.2935
Sdad1	SDA1 domain containing 1	2.12631e-06	1.95877	2.92439e-07	2.38659	0.32627	1.06027	0.00181261	1.29185
Taf1d	TATA box binding protein (TBP)-associated factor, RNA polymerase I, D, 41kDa	9.25831e-06	2.53976	1.19957e-06	3.39007	0.732063	-1.034	0.0267475	1.29091
Akr1c14	aldo-keto reductase family 1, member C14	3.65602e-05	-5.62856	2.83042e-05	-5.98876	0.170927	1.37299	0.260854	1.29041
Nip7	nuclear import 7 homolog (S. cerevisiae)	0.000202387	1.58629	4.70636e-06	2.1731	0.427918	-1.06174	0.0074892	1.29025
Mms22l	MMS22-like, DNA repair protein	0.000290815	2.17292	8.34961e-05	2.5345	0.451187	1.10609	0.0803823	1.29015
KIFC2	kinesin family member C2	8.68963e-06	-3.64105	2.73021e-05	-3.02389	0.610599	1.0711	0.0853195	1.28971
Nup37	nucleoporin 37	0.000410066	1.65477	2.17398e-05	2.15139	0.925865	-1.00839	0.0192676	1.2893
Itga11	integrin, alpha 11	9.55744e-05	-1.78136	1.96995e-05	-2.05265	0.00118055	1.48514	0.0136097	1.28886
Pnpla3	patatin-like phospholipase domain containing 3	1.06852e-06	-4.39091	8.70221e-07	-4.57025	0.0311879	1.34135	0.0542969	1.28871
Trmt61a	tRNA methyltransferase 61 homolog A (S. cerevisiae)	0.000110533	1.61959	1.9734e-06	2.30103	0.189089	-1.10363	0.00624814	1.28734
Trip13	thyroid hormone receptor interactor 13	3.62678e-05	2.19439	3.52514e-06	2.93322	0.704198	-1.0384	0.0298297	1.28726
Ebna1bp2	EBNA1 binding protein 2	3.07164e-05	1.89164	3.18313e-06	2.37409	0.751758	1.02516	0.0105307	1.28663
Nup43	nucleoporin 43	0.00147304	1.61916	6.89259e-05	2.14649	0.766616	-1.03175	0.0391298	1.28489
Cdc20	cell division cycle 20 homolog (S. cerevisiae)	0.0132156	1.27184	1.59032e-05	2.00827	0.0261393	-1.2295	0.010904	1.28428
IGF2BP2	insulin-like growth factor 2 mRNA binding protein 2	5.35969e-08	14.9662	2.88785e-08	18.6767	0.845079	1.02868	0.112476	1.28372
Cadm1	cell adhesion molecule 1	9.40493e-05	-2.22908	0.000161138	-2.10001	0.127647	1.20885	0.0559498	1.28315
Ppat	phosphoribosyl pyrophosphate amidotransferase	0.00225921	1.64345	3.82255e-05	2.50478	0.165067	-1.18786	0.0578902	1.28307
LOC100362121	damage specific DNA binding protein 2	4.8944e-05	-2.16995	0.000360232	-1.78756	0.591492	1.05653	0.0352952	1.28255
Mcm10	minichromosome maintenance complex component 10	0.00312499	1.81133	9.09532e-05	2.79621	0.228521	-1.20417	0.119414	1.28199
Gmps	guanine monphosphate synthetase	4.43415e-06	1.79973	4.36671e-07	2.21548	0.488592	1.0399	0.00179669	1.28012
Pak1ip1	PAK1 interacting protein 1	3.54726e-05	2.19156	2.67715e-06	3.03622	0.427178	-1.08297	0.032383	1.27928
Ssr1	signal sequence receptor, alpha	2.75574e-05	1.91596	2.52206e-06	2.44963	0.997696	-1.00023	0.0122644	1.27825
Rac1	Ras-related C3 botulinum toxin substrate 1	0.0341235	1.448	0.463985	-1.11806	0.00104034	2.06878	0.129578	1.27786
LOC100912578	stress-70 protein, mitochondrial-like	7.07881e-06	1.68168	4.4764e-07	2.10942	0.725938	1.01859	0.00130465	1.27767
Zfp395	zinc finger protein 395	0.000125449	-2.19118	0.000477587	-1.9037	0.386187	1.10994	0.0635449	1.27756
Id3	inhibitor of DNA binding 3	5.94686e-07	44.6014	3.9793e-07	54.607	0.877747	1.04345	0.387121	1.27753
Dyrk2	dual-specificity tyrosine-(Y)-phosphorylation regulated kinase 2	0.00164488	-2.1629	0.0165616	-1.65041	0.881412	-1.02588	0.178192	1.27746
SIX3	SIX homeobox 3	0.00190188	-1.92432	0.000417406	-2.29946	0.0192003	1.52432	0.129872	1.27563
Clspn	claspin homolog (Xenopus laevis)	0.000646322	2.033	0.000470026	2.10672	0.152462	1.23095	0.101104	1.27559
Ear11	eosinophil-associated, ribonuclease A family, member 11	0.0268546	1.76985	0.00387767	2.33245	0.879369	-1.03362	0.282869	1.27501
LOC100912083	uncharacterized LOC100912083	0.0260836	2.17811	0.0152989	2.40588	0.629701	1.15401	0.420416	1.27468
Sorbs1	sorbin and SH3 domain containing 1	0.00581887	-1.27056	0.000191254	-1.51694	0.00018177	1.52166	0.00543009	1.27451
Tk1	thymidine kinase 1, soluble	0.000789711	1.94841	5.5575e-05	2.68035	0.560401	-1.0805	0.0947137	1.27317
Nop56	NOP56 ribonucleoprotein homolog (yeast)	1.00944e-05	2.02817	2.04169e-06	2.39672	0.341608	1.07592	0.0105725	1.27143
LOC100310874	antisense RNA overlapping MCH	0.027345	1.57853	0.000771049	2.43573	0.286084	-1.21375	0.1944	1.2713
Pole2	polymerase (DNA directed), epsilon 2 (p59 subunit)	0.00378498	1.83486	0.000727968	2.22155	0.754268	1.05	0.149632	1.27128
Map4k4	mitogen-activated protein kinase kinase kinase kinase 4	0.00114637	2.47974	0.00389076	2.09281	0.0570935	1.50524	0.229914	1.27037
Nmral1	NmrA-like family domain containing 1	0.00184434	1.83937	0.000134498	2.48815	0.650246	-1.06493	0.111117	1.27024
Cyp4f4	cytochrome P450, family 4, subfamily f, polypeptide 4	8.05706e-05	-4.24477	0.000408747	-3.12853	0.741909	-1.06945	0.261334	1.26869
Mad2l1	MAD2 mitotic arrest deficient-like 1 (yeast)	0.00117033	1.84947	1.93107e-05	3.06332	0.0653386	-1.30603	0.0940376	1.26821
Timm9	translocase of inner mitochondrial membrane 9 homolog (yeast)	7.59275e-05	1.78256	6.64649e-06	2.24052	0.912117	1.00893	0.0160015	1.26814
Cirh1a	cirrhosis, autosomal recessive 1A	5.76199e-05	1.5799	1.03048e-06	2.19179	0.168788	-1.09406	0.00397142	1.26803
Ccdc125	coiled-coil domain containing 125	0.00343124	3.59178	0.00504244	3.29687	0.330855	1.38089	0.468841	1.26751
SH3RF2	SH3 domain containing ring finger 2	0.00307746	-5.12895	0.00996289	-3.71803	0.831619	-1.08971	0.563249	1.26591
Ascl2	achaete-scute complex homolog 2 (Drosophila)	5.37037e-06	-5.8054	2.13486e-05	-4.30891	0.713508	-1.06497	0.19304	1.2651
CNTN3	contactin 3 (plasmacytoma associated)	0.000103786	-3.60698	0.000352218	-2.92413	0.895026	1.02498	0.231487	1.26433
Arg2	arginase type II	3.68824e-06	-2.42881	1.3439e-05	-2.10995	0.27185	1.09827	0.018368	1.26424
Incenp	inner centromere protein	0.00504019	1.71147	0.00094752	2.04211	0.699142	1.05787	0.135787	1.26224
Rrm2	ribonucleotide reductase M2	5.60143e-05	2.30755	3.31277e-06	3.40863	0.182584	-1.17108	0.0642053	1.26137
Rrp15	ribosomal RNA processing 15 homolog (S. cerevisiae)	0.000291861	1.92135	3.44083e-05	2.42602	0.991933	-1.00112	0.0622587	1.26125
Pttg1	pituitary tumor-transforming 1	8.72762e-05	1.93588	3.9265e-06	2.74091	0.237246	-1.12328	0.034504	1.26047
Nap1l1	Nucleosome assembly protein 1-like 1	1.54339e-05	1.85958	2.12093e-06	2.2434	0.53327	1.04475	0.00880124	1.26038
Cndp2	CNDP dipeptidase 2 (metallopeptidase M20 family)	1.39012e-06	1.80606	1.17111e-07	2.25604	0.860752	1.00847	0.0011063	1.25972
Cyp26a1	cytochrome P450, family 26, subfamily a, polypeptide 1	6.968e-05	-3.11267	0.000142067	-2.78945	0.447981	1.1285	0.166644	1.25927
Ezh2	enhancer of zeste homolog 2 (Drosophila)	8.99575e-05	1.66065	2.81016e-06	2.25385	0.314735	-1.07817	0.0111878	1.25881
Tp53	tumor protein p53	5.99549e-06	1.66307	4.11573e-07	2.05901	0.74663	1.01637	0.00147848	1.25835
Luc7l3	LUC7-like 3 (S. cerevisiae)	0.336249	1.1659	0.755089	-1.04963	0.0207614	1.53871	0.165454	1.25736
Alad	aminolevulinate, delta-, dehydratase	7.5104e-07	-3.30956	3.80001e-06	-2.63261	0.995749	-1.00048	0.0303922	1.25654
Rac2	ras-related C3 botulinum toxin substrate 2 (rho family, small GTP binding protein Rac2)	0.00132182	2.41458	0.00102851	2.50408	0.324824	1.21151	0.247314	1.25641
Tlcd1	TLC domain containing 1	0.000355536	-2.26405	0.00178329	-1.88473	0.754437	1.04574	0.137315	1.2562
Vars	valyl-tRNA synthetase	1.13179e-06	2.08379	4.15945e-07	2.30695	0.055964	1.13396	0.00372826	1.2554
Anapc1	anaphase promoting complex subunit 1	0.00296825	1.79784	0.000592167	2.14503	0.725609	1.052	0.141777	1.25515
Bid	BH3 interacting domain death agonist	0.000276358	2.56693	4.6077e-05	3.38286	0.758361	-1.05008	0.177149	1.25502
Rxrg	retinoid X receptor gamma	0.000267868	-2.30209	0.0294727	-1.42966	0.102027	-1.28339	0.131676	1.25467
Il12a	interleukin 12a	2.18771e-06	-2.80154	2.35421e-05	-2.11659	0.551127	-1.05502	0.0299451	1.25459
Ppp2r5b	protein phosphatase 2, regulatory subunit B', beta isoform	1.02079e-06	-2.39247	1.28852e-05	-1.86593	0.743872	-1.02257	0.00896531	1.25389
Fgfr3	Fibroblast growth factor receptor 3	3.14939e-06	-2.33932	9.71206e-06	-2.07847	0.187062	1.11347	0.0163142	1.25321
Cdca3	cell division cycle associated 3	0.000335726	1.8978	6.74906e-06	3.026	0.0545289	-1.27336	0.0695526	1.25218
Acot1	acyl-CoA thioesterase 1	0.00164169	-3.19791	0.00156919	-3.22585	0.381556	1.26038	0.398865	1.24946
SLC16A12	solute carrier family 16, member 12 (monocarboxylic acid transporter 12)	1.08663e-07	-18.2272	4.49525e-07	-11.2327	0.150499	-1.29894	0.21309	1.24924
LOC100909889	uncharacterized LOC100909889	6.83177e-05	2.62092	2.35504e-05	3.05521	0.606976	1.07105	0.121673	1.24852
Ubap2	ubiquitin-associated protein 2	6.5533e-06	1.62721	3.83902e-07	2.02552	0.953218	1.00285	0.00150994	1.24833
Tnnt2	troponin T type 2 (cardiac)	0.00104754	2.9669	0.000518945	3.36656	0.672335	1.10009	0.3374	1.24828
Fcgr2a	Fc fragment of IgG, low affinity IIa, receptor (CD32) /// Fc gamma receptor II beta	6.71679e-06	12.1237	2.99131e-06	16.0802	0.807813	-1.06269	0.386221	1.24811
LOC679127	similar to Protein KIAA0690	0.00317296	1.52473	9.69128e-05	2.06575	0.439123	-1.08609	0.0609081	1.24744
Gm2a	GM2 ganglioside activator	2.37837e-05	2.06119	7.7688e-06	2.31958	0.251015	1.10837	0.0289018	1.24731
Nrg1	neuregulin 1	0.000455993	2.77037	1.30308e-05	5.41117	0.0363656	-1.56669	0.252622	1.24672
Nlk	Nemo like kinase	2.41077e-05	-2.27216	6.30106e-05	-2.05125	0.24708	1.12528	0.0481053	1.24647
Iqgap3	IQ motif containing GTPase activating protein 3	0.000177897	2.27953	8.07358e-06	3.54604	0.115506	-1.24853	0.118439	1.24595
Kif11	kinesin family member 11	0.000987035	1.71309	3.1592e-05	2.43874	0.245892	-1.14273	0.0730839	1.24578
Snhg4	small nucleolar RNA host gene 4 (non-protein coding)	0.000881404	2.20299	0.00087784	2.20411	0.192574	1.2442	0.191652	1.24483
C1qbp	complement component 1, q subcomponent binding protein	2.77896e-06	2.07061	5.54517e-07	2.455	0.464601	1.04937	0.00830355	1.24418
Mxra7	matrix-remodelling associated 7	2.31313e-05	-2.07926	2.742e-05	-2.0445	0.0433554	1.22259	0.0316946	1.24338
Eif4g1	eukaryotic translation initiation factor 4 gamma, 1	0.00070314	1.79095	0.000177536	2.04783	0.465601	1.08738	0.0815351	1.24335
Cdkn3	cyclin-dependent kinase inhibitor 3	0.000336459	1.66099	1.13539e-05	2.26625	0.304893	-1.09774	0.0338487	1.24291
Klk10	kallikrein related-peptidase 10	0.0687113	3.09107	0.0263275	4.30246	0.836721	-1.12109	0.697477	1.24156
Prmt5	protein arginine methyltransferase 5	0.000290494	1.57311	8.1095e-06	2.11205	0.322335	-1.08153	0.0195979	1.24138
C1s	complement component 1, s subcomponent	1.39954e-05	10.3356	6.80522e-06	13.106	0.928252	-1.02348	0.416031	1.23894
Pbk	PDZ binding kinase	0.000866753	1.93773	3.21043e-05	2.91772	0.166564	-1.21556	0.133673	1.23873
Kif2c	kinesin family member 2C	0.0014215	1.6793	3.99701e-05	2.4144	0.206985	-1.16118	0.0852785	1.23817
Lyar	Ly1 antibody reactive homolog (mouse)	9.71554e-05	1.88761	8.59801e-06	2.42808	0.673891	-1.03957	0.0433941	1.23737
Lims2	LIM and senescent cell antigen like domains 2	0.00243767	-1.82032	9.60188e-05	-2.67946	0.0024353	1.8205	0.161156	1.23678
Ftsj3	FtsJ homolog 3 (E. coli)	2.06225e-05	1.65007	1.22259e-06	2.07341	0.785552	-1.01601	0.00551777	1.23675
LOC680531	similar to CG3880-PA	4.61059e-07	5.61279	9.26512e-08	8.32968	0.159402	-1.20033	0.109091	1.23637
Crct1	cysteine-rich C-terminal 1	0.0518479	13.2148	0.092713	8.65716	0.590768	1.88386	0.857046	1.23414
Ska3	spindle and kinetochore associated complex subunit 3	6.46775e-06	-2.70226	6.23032e-06	-2.71572	0.0550397	1.24006	0.0596733	1.23392
Ska3	spindle and kinetochore associated complex subunit 3	6.46775e-06	-2.70226	6.23032e-06	-2.71572	0.0550397	1.24006	0.0596733	1.23392
Ncl	nucleolin	3.05492e-06	1.91051	3.77042e-07	2.34007	0.903865	1.00707	0.00593108	1.2335
Zcchc11	zinc finger, CCHC domain containing 11	7.96452e-05	-3.23561	0.000695605	-2.34522	0.502756	-1.11856	0.225312	1.23342
Isg15	ISG15 ubiquitin-like modifier	0.558382	-1.34195	0.213322	1.91794	0.164897	-2.08808	0.675626	1.2326
Abcc3	ATP-binding cassette, sub-family C (CFTR/MRP), member 3	0.00115551	2.26614	0.000559895	2.50148	0.525463	1.11656	0.243608	1.23251
Mgst2	microsomal glutathione S-transferase 2	4.3688e-05	4.84183	4.91003e-05	4.72027	0.271968	1.26191	0.324029	1.23023
SYNPO2	synaptopodin 2	0.858086	-1.19426	0.345565	-2.62094	0.331931	2.69888	0.835034	1.22978
Casc4	cancer susceptibility candidate 4	0.000324246	3.34818	0.000110289	4.11498	0.999191	1.00021	0.335553	1.22928
Ltb4r	leukotriene B4 receptor	0.00035125	2.24758	0.000171259	2.46083	0.422236	1.12253	0.169709	1.22904
Ns5atp9	NS5A (hepatitis C virus) transactivated protein 9	9.12246e-06	2.29443	8.04899e-07	3.13765	0.238183	-1.11281	0.0394542	1.22887
Lrg1	leucine-rich alpha-2-glycoprotein 1	0.000668499	2.99113	0.000152654	3.92251	0.756842	-1.06755	0.342735	1.2284
RGD1564927	similar to TGFB-induced factor 2	0.0330182	1.36949	0.00031677	2.08706	0.115216	-1.24111	0.131571	1.22791
Ocm	oncomodulin	0.000658819	2.73137	0.000276766	3.14602	0.74113	1.06592	0.303616	1.22774
Cryba1	crystallin, beta A1	0.0620341	-5.42951	0.458416	-1.83667	0.292724	-2.40839	0.799507	1.22745
Fjx1	four jointed box 1 (Drosophila)	3.35532e-05	-4.87391	0.000119488	-3.76224	0.783161	-1.05584	0.315195	1.22697
Hlf	hepatic leukemia factor /// similar to hepatic leukemia factor	9.2325e-06	-2.30004	0.000694614	-1.56796	0.0660839	-1.19624	0.0417606	1.22626
Atp2b1	ATPase, Ca++ transporting, plasma membrane 1	0.000659415	1.87144	0.0146033	1.43513	0.00379443	1.5985	0.118449	1.22582
Ldhb	lactate dehydrogenase B	3.8658e-05	-2.19347	3.87865e-05	-2.19268	0.0684066	1.22533	0.0680101	1.22578
Elovl6	ELOVL family member 6, elongation of long chain fatty acids (yeast)	0.000476184	-2.23857	0.00176986	-1.9234	0.726865	1.05287	0.191282	1.22539
LOC691153	Hypothetical protein LOC691153	5.35148e-06	-2.51033	5.87582e-05	-1.94312	0.558347	-1.05428	0.0467857	1.22539
Ipo4	importin 4	1.52343e-06	2.08411	2.40726e-07	2.54106	0.938245	1.00469	0.00847237	1.22497
Tet3	tet oncogene family member 3	1.52809e-06	-2.03831	1.5633e-05	-1.68685	0.819466	1.01348	0.00729703	1.22464
Psmd3	proteasome (prosome, macropain) 26S subunit, non-ATPase, 3	0.000266032	1.69521	3.42751e-05	2.02769	0.802347	1.02236	0.0463432	1.22287
Chrm3	cholinergic receptor, muscarinic 3	0.000185374	-3.44153	8.41325e-05	-3.99283	0.102978	1.41793	0.321244	1.22215
Gnl3	guanine nucleotide binding protein-like 3 (nucleolar)	8.84415e-06	1.93726	1.04776e-06	2.40167	0.829176	-1.01493	0.0168431	1.22148
Aqp5	aquaporin 5	0.00013773	-3.94865	0.000360252	-3.29442	0.929363	1.01865	0.351874	1.22094
Iah1	isoamyl acetate-hydrolyzing esterase 1 homolog (S. cerevisiae)	3.63384e-07	-2.78393	1.72259e-06	-2.30841	0.861903	1.01224	0.0185803	1.22076
Ccdc8	coiled-coil domain containing 8	0.000122011	3.69927	0.000152089	3.55105	0.239516	1.27152	0.322484	1.22057
Eef2k	Eukaryotic elongation factor-2 kinase	0.0273152	-1.92262	0.00878372	-2.30566	0.156514	1.46139	0.438717	1.21861
Slfn8	schlafen 8	0.000386402	2.4419	5.78632e-05	3.23996	0.590569	-1.08941	0.233098	1.21792
Mrps27	Mitochondrial ribosomal protein S27	0.000627804	1.74208	3.54774e-05	2.32241	0.39735	-1.09582	0.0917616	1.21655
Sec14l3	SEC14-like 3 (S. cerevisiae)	1.57349e-07	-12.1911	1.16239e-07	-13.4581	0.0828742	1.34231	0.224654	1.21594
Etv5	ets variant 5	0.000356225	-2.78746	0.00271575	-2.09719	0.618851	-1.09384	0.293633	1.21511
LOC100912383	uncharacterized LOC100912383	0.0931879	-1.1961	5.75341e-05	-2.06157	4.94337e-05	2.09378	0.072189	1.21479
Fat2	FAT tumor suppressor homolog 2 (Drosophila)	1.39954e-07	2.36519	2.18793e-07	2.25446	0.00136973	1.27309	0.0049453	1.21349
Osr2	odd-skipped related 2 (Drosophila)	0.000149288	3.46211	8.96988e-05	3.80347	0.605885	1.1043	0.326143	1.21318
Sfxn1	sideroflexin 1	2.98933e-05	1.74899	1.13613e-06	2.37416	0.12373	-1.12083	0.0202503	1.21111
Fam189a2	family with sequence similarity 189, member A2	8.29375e-05	-2.36225	0.0025092	-1.66389	0.212319	-1.17274	0.142692	1.2106
Tmem176a	transmembrane protein 176A	5.79576e-05	-2.02208	0.00037327	-1.712	0.800898	1.02416	0.0712509	1.20965
Plekha6	Pleckstrin homology domain containing, family A member 6	2.7417e-07	-2.02388	1.9726e-06	-1.72589	0.511447	1.03139	0.00288542	1.20947
Timm10	translocase of inner mitochondrial membrane 10 homolog (yeast)	0.000674357	1.51423	1.73965e-05	2.01808	0.243269	-1.10235	0.039701	1.20901
LOC304558	similar to TPR repeat-containing protein KIAA1043	1.08064e-06	-2.79777	8.51548e-07	-2.88983	0.0220383	1.24871	0.0418313	1.20893
Cenpw	centromere protein W	0.00117685	1.61693	1.38737e-05	2.49882	0.0362874	-1.27855	0.0886873	1.20873
Apc2	adenomatosis polyposis coli 2	4.83701e-05	-6.0509	0.000154782	-4.60107	0.719563	-1.08861	0.431625	1.20806
Trmt6	tRNA methyltransferase 6 homolog (S. cerevisiae)	1.43411e-05	1.91898	1.52508e-06	2.40522	0.609124	-1.03792	0.0272099	1.20759
Mis18a	MIS18 kinetochore protein homolog A (S. pombe)	2.03732e-05	2.44843	0.000941848	1.67024	0.000473222	1.76993	0.0984304	1.20738
Atf5	activating transcription factor 5	0.00013092	2.20802	2.61353e-05	2.69905	0.916432	-1.0126	0.142089	1.20718
Ampd3	adenosine monophosphate deaminase 3	3.20885e-05	2.08712	2.22126e-05	2.16812	0.126734	1.16207	0.0651505	1.20717
Fbp2	fructose-1,6-bisphosphatase 2	0.00298653	-2.10133	8.08109e-05	-3.6574	0.00298955	2.10106	0.317783	1.20715
Ptrh2	peptidyl-tRNA hydrolase 2	4.76266e-05	1.60351	2.70833e-06	2.00412	0.574156	-1.03562	0.0136563	1.20685
Per3	period homolog 3 (Drosophila)	0.000424592	-2.40396	0.000170285	-2.73036	0.0725649	1.37	0.253249	1.20623
Rabggtb	Rab geranylgeranyltransferase, beta subunit	5.40625e-07	1.98582	1.76685e-07	2.20848	0.128079	1.08447	0.00440897	1.20607
Antxr1	anthrax toxin receptor 1	0.000189842	-2.1483	0.00119924	-1.78033	0.996113	-1.00059	0.150529	1.20597
Tomm70a	translocase of outer mitochondrial membrane 70 homolog A (S. cerevisiae)	4.88938e-05	1.69224	2.10957e-06	2.23286	0.21391	-1.09438	0.0231956	1.20568
RGD1305592	similar to RIKEN cDNA 2900092E17	5.78506e-06	1.70555	3.06906e-07	2.18916	0.251463	-1.06471	0.0061731	1.20554
Ccne1	cyclin E1	1.65367e-05	2.71843	1.94144e-06	3.78152	0.227038	-1.15392	0.125965	1.20551
C3	complement component 3	0.00410706	3.2195	0.000746854	4.73047	0.519618	-1.21927	0.543943	1.20508
Dyrk2	dual-specificity tyrosine-(Y)-phosphorylation regulated kinase 2	6.36399e-05	-2.24393	0.000459984	-1.83278	0.884975	-1.01603	0.117993	1.20501
Sephs1	selenophosphate synthetase 1	2.46021e-05	-2.29713	9.64833e-05	-1.98848	0.673047	1.04296	0.0883304	1.20484
Bmp6	Bone morphogenetic protein 6	0.000725262	-2.3594	0.000180156	-2.88262	0.0440119	1.47177	0.283269	1.20463
TOMM40	translocase of outer mitochondrial membrane 40 homolog (yeast)	4.30678e-05	1.83067	3.34462e-06	2.34859	0.426507	-1.06524	0.0390308	1.20435
Ptbp1	polypyrimidine tract binding protein 1	1.99304e-05	1.63432	1.1468e-06	2.05007	0.475159	-1.04217	0.00989787	1.20363
NFIB	nuclear factor I/B	5.45219e-05	1.93513	1.82988e-05	2.15404	0.385933	1.08118	0.0612256	1.20349
Il33	interleukin 33	6.35691e-05	7.1143	0.000361846	4.59472	0.0430782	1.86024	0.497891	1.20142
Gars	glycyl-tRNA synthetase	2.05879e-07	2.16824	8.11311e-08	2.39146	0.110341	1.08921	0.00484953	1.20134
Flna	filamin A, alpha	2.63534e-06	2.69381	1.70688e-06	2.855	0.183196	1.1316	0.0645763	1.19931
CADM1	cell adhesion molecule 1	1.88497e-06	-5.03505	5.61074e-06	-4.05407	0.796654	-1.03592	0.207988	1.19891
RGD1566102	RGD1566102	0.00262208	2.4022	0.00544026	2.15836	0.19494	1.3343	0.399677	1.19886
Dsn1	DSN1, MIND kinetochore complex component, homolog (S. cerevisiae)	0.00134908	1.71267	6.87216e-05	2.31869	0.307337	-1.12989	0.145084	1.19822
Phf15	PHD finger protein 15	9.01375e-05	-2.00036	0.000156253	-1.89786	0.218828	1.13658	0.0965285	1.19797
Phf15	PHD finger protein 15	9.01375e-05	-2.00036	0.000156253	-1.89786	0.218828	1.13658	0.0965285	1.19797
HAUS6	HAUS augmin-like complex, subunit 6	0.00118521	1.8237	0.000267421	2.12973	0.841498	1.02563	0.178951	1.19773
Pola1	polymerase (DNA directed), alpha 1	0.00391554	1.6926	0.000234139	2.28617	0.386985	-1.1277	0.206859	1.19772
LOC100361467	hypothetical LOC100361467	5.03205e-05	4.36133	8.32939e-05	3.94353	0.173069	1.32427	0.365402	1.19741
Pkmyt1	protein kinase, membrane associated tyrosine/threonine 1	0.00345536	1.70456	0.000541846	2.05935	0.946145	-1.00912	0.204147	1.19723
Pitrm1	pitrilysin metallopeptidase 1	6.14718e-05	1.91767	8.05163e-06	2.36255	0.736204	-1.03023	0.0694751	1.19584
Mmp14	Matrix metallopeptidase 14 (membrane-inserted)	0.000530796	2.19815	0.000306581	2.35324	0.457604	1.11676	0.242408	1.19555
LOC691700	similar to heparan sulfate D-glucosaminyl 3-O-sulfotransferase 4	0.00244227	-3.25167	0.230242	-1.42185	0.0434431	-1.91434	0.530113	1.19464
LOC500013 /// LOC680260 /// RGD1561472 /// Samd9l	similar to sterile alpha motif domain containing 9-like /// similar to sterile alpha mo	0.000822252	-2.88263	0.0270955	-1.73254	0.141943	-1.39329	0.408835	1.19416
Acot1 /// Acot2	acyl-CoA thioesterase 1 /// acyl-CoA thioesterase 2	5.63258e-05	-2.0137	0.000126132	-1.8671	0.2948	1.10697	0.0863526	1.19389
Donson	downstream neighbor of SON	4.1637e-05	2.5133	1.51891e-05	2.88102	0.7315	1.04151	0.160082	1.19389
Tyms	thymidylate synthetase	0.00943813	1.85937	0.000353321	2.95024	0.157308	-1.3299	0.362236	1.19309
Suv39h1	suppressor of variegation 3-9 homolog 1 (Drosophila)	0.000235262	1.64786	2.06585e-05	2.02214	0.721485	-1.02976	0.0582361	1.19166
LOC100911266	uncharacterized LOC100911266	0.00908824	1.78302	0.000882717	2.38581	0.51201	-1.12303	0.330459	1.19149
Cuedc2	CUE domain containing 2	0.000289111	1.95454	0.000100271	2.18533	0.590352	1.06352	0.153484	1.18911
Lrrc59	leucine rich repeat containing 59	1.35052e-08	5.60412	7.31969e-09	6.4394	0.66491	1.03425	0.0501203	1.18841
Wdr43	WD repeat domain 43	1.38181e-06	2.13251	9.49796e-08	2.91462	0.0468342	-1.15015	0.0200178	1.18833
ENY2	enhancer of yellow 2 homolog (Drosophila)	1.37156e-05	-2.20013	6.76967e-05	-1.88303	0.855082	1.01599	0.0757888	1.18709
Cbx7	chromobox homolog 7	2.37901e-06	-2.74264	4.44863e-06	-2.53184	0.314953	1.09568	0.0792283	1.18691
Polr3b	polymerase (RNA) III (DNA directed) polypeptide B	0.000441106	1.48795	3.86701e-06	2.16107	0.0183295	-1.22751	0.0416091	1.18319
Dusp7	dual specificity phosphatase 7	1.97908e-05	2.65016	4.36115e-06	3.30024	0.649294	-1.05297	0.163238	1.18266
RGD1560175	similar to hypothetical protein KIAA2018	4.41752e-05	-2.11841	0.000261041	-1.78991	0.989126	-1.00132	0.113156	1.18197
Trpc2	transient receptor potential cation channel, subfamily C, member 2	1.62513e-05	-2.46927	0.000225931	-1.86694	0.287319	-1.11903	0.128662	1.18194
Nup205	nucleoporin 205	1.06318e-06	1.95248	2.8854e-07	2.20804	0.412642	1.04495	0.0111542	1.18172
Scn11a	sodium channel, voltage-gated, type XI, alpha	0.648721	1.17839	0.179096	-1.66667	0.0414065	2.32074	0.643318	1.18164
Unc13c	unc-13 homolog C (C. elegans)	3.98627e-07	-5.82591	2.39811e-07	-6.56331	0.0418231	1.33058	0.196088	1.18109
Stard4	StAR-related lipid transfer (START) domain containing 4	0.000201879	1.6632	5.25822e-06	2.32327	0.0659708	-1.1833	0.0691308	1.18049
Aurka	aurora kinase A	3.79497e-06	3.47476	4.09959e-07	5.28656	0.0529428	-1.2891	0.176947	1.18022
Mapk1ip1l	Mitogen-activated protein kinase 1 interacting protein 1-like	0.00153887	2.06545	0.00186157	2.01942	0.25739	1.20702	0.314398	1.18012
Shisa4	shisa homolog 4 (Xenopus laevis)	2.58337e-05	1.98206	6.59652e-06	2.27661	0.748799	1.02672	0.0718593	1.17929
Vipr1	vasoactive intestinal peptide receptor 1	3.78643e-05	-2.6756	0.0425409	-1.33725	0.00233791	-1.69673	0.208864	1.17922
Nupr1	nuclear protein, transcriptional regulator, 1	0.0274315	2.01106	0.0102281	2.37986	0.989041	-1.00369	0.543468	1.17904
Mthfd1l	methylenetetrahydrofolate dehydrogenase (NADP+ dependent) 1-like	0.000157111	2.59075	0.000172726	2.55727	0.249612	1.19377	0.28326	1.17834
Dusp6	Dual specificity phosphatase 6	0.0465595	2.15611	0.0277034	2.4043	0.870873	1.05637	0.629639	1.17797
Smo	smoothened homolog (Drosophila)	2.17866e-05	3.30363	1.2076e-05	3.64956	0.649528	1.06617	0.262407	1.17781
Trim14	tripartite motif-containing 14	7.86879e-05	-3.2626	0.000935902	-2.26563	0.245433	-1.22289	0.338377	1.17757
Fam98a	family with sequence similarity 98, member A	3.25341e-06	1.84047	1.46444e-07	2.48983	0.0320813	-1.14927	0.0161514	1.17711
Mn1	Meningioma 1	0.566021	-1.15259	0.11717	-1.51679	0.102333	1.549	0.511412	1.17707
Prim2	primase, DNA, polypeptide 2	6.07648e-05	-2.33763	0.00176836	-1.66641	0.152874	-1.19192	0.180934	1.17692
GRAMD1B	GRAM domain containing 1B	1.09407e-05	-2.40684	0.000236994	-1.77005	0.149903	-1.15573	0.111419	1.17653
Nrg1	neuregulin 1	0.000116118	2.56712	4.55027e-06	4.34877	0.0271817	-1.44035	0.264755	1.17612
Cenpw	centromere protein W	0.000326447	1.98083	1.66476e-05	2.83426	0.123287	-1.21713	0.193944	1.17558
Fbl	fibrillarin	2.34565e-06	1.8009	4.7261e-07	2.0642	0.630407	1.02512	0.0116845	1.175
Cenpt	centromere protein T	0.000305623	2.30052	4.79066e-05	2.96657	0.516376	-1.09798	0.276491	1.17445
Ncoa3	Nuclear receptor coactivator 3	2.92633e-07	-3.01734	3.50074e-07	-2.94225	0.0931005	1.14504	0.0536653	1.17427
Sema5a	sema domain, seven thrombospondin repeats (type 1 and type 1-like), transmembrane domai	1.84794e-06	-3.12084	3.97416e-06	-2.79822	0.598959	1.05225	0.123616	1.17357
Rad54l	RAD54 like (S. cerevisiae)	0.00817077	1.60369	0.000891547	2.00241	0.656409	-1.06447	0.271949	1.173
Cadm1	cell adhesion molecule 1	1.04822e-06	-5.18669	4.22125e-06	-3.93962	0.378896	-1.1234	0.239806	1.17193
Itgb7	integrin, beta 7	0.46256	1.10025	0.177276	-1.20106	0.00773246	1.54823	0.236771	1.1716
Mlf1ip	myeloid leukemia factor 1 interacting protein	5.63253e-05	2.24271	4.97842e-06	3.0747	0.170563	-1.17059	0.169346	1.17118
Iars	isoleucyl-tRNA synthetase	2.32835e-08	2.49366	5.95797e-09	2.96216	0.747671	-1.01427	0.00593048	1.17116
Cenpq	centromere protein Q	0.000822419	1.81217	0.000208024	2.07986	0.865795	1.02015	0.205064	1.17084
Pcdha1 /// Pcdha10 /// Pcdha11 /// Pcdha12 /// Pcdha13 /// Pcdha2 /// Pcdha3 /// Pcdha4 /// Pcdha5 /// Pcdha6 /// Pcdha7 /// Pcdha8 /// Pcdha9 /// Pcdhac1 /// Pcdhac2	protocadherin alpha 1 /// protocadherin alpha 10 /// protocadherin alpha 11 /// protoca	0.335388	-1.18109	0.0231435	-1.57608	0.0251493	1.56236	0.35995	1.17081
Krtap13-2	keratin associated protein 13-2	0.0245383	-5.973	0.0233464	-6.09896	0.78953	1.19543	0.813559	1.17074
Jmjd7 /// Pla2g4b	jumonji domain containing 7 /// phospholipase A2, group IVB (cytosolic)	9.01014e-05	2.45006	1.5714e-05	3.13091	0.496447	-1.09237	0.24148	1.16984
Zfp462	zinc finger protein 462	9.01025e-08	-7.49886	2.19918e-07	-6.03243	0.60047	-1.06266	0.197078	1.16979
Plk4	polo-like kinase 4 (Drosophila)	0.000154517	1.95347	2.28885e-05	2.39992	0.637088	-1.05031	0.156053	1.1697
Elmo2	engulfment and cell motility 2	0.00430259	-1.66237	8.28145e-05	-2.56935	0.00178083	1.80784	0.259152	1.16967
LOC100911253	uncharacterized LOC100911253	3.02104e-05	-2.63578	0.000526609	-1.89956	0.175549	-1.18661	0.211249	1.16935
Igfbp5	insulin-like growth factor binding protein 5	5.81164e-08	-32.4589	1.49738e-07	-21.8363	0.223754	-1.27135	0.415504	1.1692
RGD1307222	similar to mKIAA0664 protein	0.000158537	1.75564	1.92485e-05	2.13026	0.666833	-1.03846	0.102568	1.16844
BMF	Bcl2 modifying factor	9.43711e-05	-2.59427	0.000335466	-2.20867	0.969292	-1.00529	0.27488	1.16841
Snrpd1	small nuclear ribonucleoprotein D1	0.000438994	1.96008	0.000183184	2.15199	0.610811	1.06417	0.221832	1.16836
Abca2	ATP-binding cassette, sub-family A (ABC1), member 2	1.78103e-05	-2.36496	9.5735e-06	-2.54985	0.0414417	1.25961	0.140686	1.16828
Farsb	phenylalanyl-tRNA synthetase, beta subunit	0.0005533	1.59027	2.3841e-05	2.0738	0.224962	-1.11661	0.10145	1.16787
Snn	stannin	1.01409e-05	4.305	9.77025e-06	4.33663	0.352009	1.15921	0.33	1.16772
Aldob	aldolase B, fructose-bisphosphate	7.23348e-06	-2.57304	0.00100202	-1.59395	0.00805897	-1.38256	0.132491	1.16759
Slc29a2	solute carrier family 29 (nucleoside transporters), member 2	4.60323e-05	2.37917	1.70116e-05	2.70137	0.808616	1.0277	0.195064	1.16688
Fut4	fucosyltransferase 4 (alpha (1,3) fucosyltransferase, myeloid-specific)	0.00333122	1.67249	4.61709e-05	2.69198	0.0326558	-1.37954	0.251442	1.16674
Itgb4	integrin, beta 4	2.43896e-05	1.96861	7.25362e-06	2.22094	0.681375	1.03384	0.0844108	1.16635
Hmox2	Heme oxygenase (decycling) 2	0.000284034	-2.08611	0.000710544	-1.89561	0.644341	1.05934	0.237665	1.1658
RGD1309534	Similar to RIKEN cDNA 4931406C07	0.000291276	1.82368	3.53956e-05	2.25246	0.571064	-1.05996	0.159458	1.16525
LOC679127	similar to Protein KIAA0690	0.000675803	1.83294	0.000197978	2.07302	0.799964	1.03004	0.213584	1.16496
Ube2t	ubiquitin-conjugating enzyme E2T (putative)	0.00695073	1.60643	0.000528972	2.0806	0.443423	-1.11189	0.279566	1.16484
Nup155	nucleoporin 155	2.31393e-05	1.72439	3.15132e-06	2.03773	0.823202	-1.01451	0.0402711	1.16481
Csf3	colony stimulating factor 3 (granulocyte)	0.00658622	4.73602	0.00802338	4.46952	0.635784	1.23403	0.730573	1.16459
Wdr51a	WD repeat domain 51A	0.000855667	1.5384	2.37787e-05	2.06495	0.126331	-1.15284	0.105423	1.16431
Crybb2	crystallin, beta B2	0.0912758	-3.79729	0.39982	-1.85585	0.440854	-1.7575	0.832381	1.16422
Chek2	CHK2 checkpoint homolog (S. pombe)	0.0239827	1.42471	0.000321178	2.14939	0.0763048	-1.29591	0.267013	1.16416
Upp1	uridine phosphorylase 1	6.48563e-06	-3.31294	1.70293e-05	-2.86335	0.959572	1.00606	0.225127	1.16403
Fam195a	family with sequence similarity 195, member A	1.1768e-07	-3.38238	1.15296e-06	-2.47892	0.0522647	-1.1722	0.0611332	1.16402
Cd3eap	CD3e molecule, epsilon associated protein	2.21783e-05	1.71161	7.26918e-07	2.32935	0.033934	-1.16921	0.0380482	1.16396
Scnn1g	sodium channel, nonvoltage-gated 1, gamma	0.0264303	-1.46996	0.00185162	-1.90941	0.0195006	1.51171	0.316175	1.16379
Luzp5	Leucine zipper protein 5	5.18504e-05	2.36578	1.09445e-05	2.90216	0.638701	-1.05526	0.209198	1.16248
Rasd2	RASD family, member 2	3.0972e-05	-3.84191	0.0236137	-1.56422	0.00161447	-2.11348	0.376437	1.16212
Sectm1b	secreted and transmembrane 1B	0.00103111	2.72203	3.81854e-05	5.08786	0.0444747	-1.60845	0.473306	1.16207
SCRN3	secernin 3	1.51689e-05	-2.04808	0.000452383	-1.55607	0.145271	-1.13325	0.0896566	1.16143
Psip1	PC4 and SFRS1 interacting protein 1	7.56643e-05	2.06966	3.8868e-06	2.97293	0.0621911	-1.23703	0.166523	1.1612
Pds5a	PDS5, regulator of cohesion maintenance, homolog A (S. cerevisiae)	2.40769e-07	1.7379	1.3262e-08	2.22513	0.0225765	-1.10265	0.00258554	1.16116
Npas2	neuronal PAS domain protein 2	1.88077e-05	3.83196	7.21113e-06	4.61183	0.812309	-1.03739	0.349713	1.16014
RGD1306941	similar to CG31122-PA	7.34665e-05	1.60724	4.31625e-06	2.00988	0.273069	-1.07797	0.048354	1.16007
Plekhh1	pleckstrin homology domain containing, family H (with MyTH4 domain) member 1	0.00375969	-1.79857	0.000668783	-2.18424	0.0462838	1.40864	0.337643	1.15992
Reep6	receptor accessory protein 6	1.72112e-06	-2.07624	8.94797e-05	-1.534	0.0310105	-1.16712	0.0366872	1.15968
LOC304558	similar to TPR repeat-containing protein KIAA1043	7.23545e-06	-2.85082	6.73178e-06	-2.87987	0.161795	1.17124	0.187142	1.15943
Galntl4	UDP-N-acetyl-alpha-D-galactosamine:polypeptide N-acetylgalactosaminyltransferase-like 4	1.79575e-06	-5.79581	3.94655e-06	-4.87527	0.863556	-1.02571	0.332484	1.15902
Hunk	Hormonally upregulated Neu-associated kinase	1.3252e-06	-2.79324	7.36673e-08	-4.44015	6.3299e-05	1.84142	0.104722	1.15841
Uck2	uridine-cytidine kinase 2	0.000305592	2.04776	0.000109728	2.29854	0.79771	1.03189	0.250002	1.15826
LOC100911806	uncharacterized LOC100911806	0.00012163	-2.84479	0.000313534	-2.48496	0.941266	1.01155	0.359721	1.15802
Nudc	nuclear distribution gene C homolog (A. nidulans)	3.10213e-06	1.87382	3.49809e-07	2.30345	0.307643	-1.06168	0.0284512	1.15786
Sned1	sushi, nidogen and EGF-like domains 1	4.44038e-05	-3.83418	0.0161171	-1.66782	0.0035619	-1.98587	0.410001	1.15763
Ehd2	EH-domain containing 2	1.38408e-05	2.00246	1.75024e-05	1.95939	0.053699	1.18249	0.0847178	1.15706
LOC366669	similar to mKIAA1011 protein	5.31398e-07	-2.2491	5.11095e-07	-2.25833	0.0287872	1.16166	0.0322264	1.15691
LOC302999	similar to tripartite motif protein 32	0.00385693	-2.18835	0.0539594	-1.55279	0.340543	-1.21843	0.476729	1.15666
ACTN1	actinin, alpha 1	5.98488e-05	7.33586	6.50972e-05	7.16637	0.535093	1.18375	0.591936	1.15641
Asph	aspartate-beta-hydroxylase	0.00661736	-1.46588	0.000195946	-1.97279	0.00298655	1.55568	0.205474	1.15595
Srm	spermidine synthase	1.74071e-06	2.27754	4.58244e-07	2.66184	0.864992	-1.01179	0.0627361	1.15512
Pde4a	Phosphodiesterase 4A, cAMP-specific (phosphodiesterase E2 dunce homolog, Drosophila)	1.63814e-07	-3.89678	7.42193e-07	-3.06312	0.267983	-1.10154	0.114196	1.15489
C1ql3	Complement component 1, q subcomponent-like 3	0.000764736	-1.64692	0.544841	1.06181	0.00233424	-1.51573	0.170136	1.15371
Fam120a	family with sequence similarity 120A	0.0190057	-1.62535	0.00239348	-2.06233	0.0506387	1.4637	0.41395	1.15357
Bmp6	bone morphogenetic protein 6	0.0004324	-1.87507	0.000126721	-2.12419	0.0405172	1.30626	0.229431	1.15307
Ska3	spindle and kinetochore associated complex subunit 3	7.92821e-06	2.7201	1.63526e-06	3.43101	0.391351	-1.09401	0.189068	1.15297
E2f5	E2F transcription factor 5	1.3727e-06	2.35177	1.44057e-07	3.14026	0.0604914	-1.15814	0.0671251	1.15295
Fn3k	fructosamine 3 kinase	5.28735e-06	-3.78605	2.91031e-05	-2.8793	0.323013	-1.14069	0.28834	1.15274
Pkm2	pyruvate kinase, muscle	7.12137e-06	2.40858	2.42288e-06	2.75645	0.937687	1.00695	0.137173	1.15238
Accn2	amiloride-sensitive cation channel 2, neuronal	0.000522462	-2.14927	0.000845631	-2.03385	0.545656	1.09038	0.3316	1.15225
Sspn	sarcospan	0.000407533	-2.10982	0.0101282	-1.5391	0.214551	-1.18968	0.303337	1.15225
Cxcl1	chemokine (C-X-C motif) ligand 1 (melanoma growth stimulating activity, alpha)	0.00232169	3.00712	0.00315084	2.84184	0.452892	1.21887	0.588477	1.15187
Itgb1bp1	integrin beta 1 binding protein 1	0.0381345	-1.45926	0.00263504	-1.92429	0.0255901	1.51751	0.383748	1.15079
Ahcy	adenosylhomocysteinase	4.99611e-08	2.30488	3.96156e-08	2.3633	0.0275222	1.12214	0.0112961	1.15059
Smad5	SMAD family member 5	9.30353e-08	2.3666	1.97409e-08	2.85588	0.347942	-1.04887	0.0189976	1.15052
Gas5	growth arrest specific 5	6.99692e-07	2.80641	3.16412e-07	3.1372	0.708644	1.0292	0.0959078	1.15051
LOC499339	hypothetical protein LOC499339	1.02493e-05	2.06186	4.9281e-06	2.22097	0.401843	1.0679	0.0958851	1.15031
Ube2k	ubiquitin-conjugating enzyme E2K (UBC1 homolog, yeast)	7.69606e-06	-2.16674	4.50505e-05	-1.83654	0.74799	-1.02571	0.104006	1.15023
Mrto4	mRNA turnover 4 homolog (S. cerevisiae)	3.44507e-06	2.38129	9.99267e-07	2.77428	0.865916	-1.01351	0.107835	1.1495
Ccdc75	coiled-coil domain containing 75	1.49534e-06	1.65793	4.20103e-08	2.22699	0.00456918	-1.16951	0.00874418	1.14855
LOC311134	hypothetical LOC311134	8.16796e-08	-4.00134	3.91411e-08	-4.58559	0.00672697	1.31611	0.105166	1.14842
Acot2	Acyl-CoA thioesterase 2	2.10017e-06	-2.98211	3.59919e-06	-2.76718	0.507206	1.06507	0.167505	1.14779
Isy1	ISY1 splicing factor homolog (S. cerevisiae)	0.000365878	1.73776	7.48016e-05	2.00588	0.949476	-1.00615	0.181348	1.14723
Rgs10	regulator of G-protein signaling 10	0.0177088	-1.81939	0.00560918	-2.12664	0.182948	1.34074	0.514427	1.14704
OTUD7B	OTU domain containing 7B	0.663525	-1.02804	0.000836126	-1.37384	0.000115753	1.53265	0.0556077	1.14688
Foxp2	Forkhead box P2	0.00241548	-3.90378	0.000326075	-6.50322	0.0722049	1.90944	0.673843	1.1462
Cpsf6	cleavage and polyadenylation specific factor 6	0.00146172	1.52278	5.04885e-05	2.00451	0.156929	-1.1486	0.162874	1.14605
BTRC	beta-transducin repeat containing	8.81711e-05	-2.0238	3.85379e-05	-2.20705	0.0514126	1.24924	0.199971	1.14552
Ccnf	cyclin F	0.000436803	2.28702	4.49452e-05	3.1566	0.230396	-1.20597	0.376883	1.1445
Mid1ip1	MID1 interacting protein 1 (gastrulation specific G12 homolog (zebrafish))	2.34653e-05	-2.10207	0.000715767	-1.5731	0.106091	-1.16793	0.152905	1.14412
Pou6f1	POU class 6 homeobox 1	4.19494e-05	-2.52772	1.60993e-05	-2.879	0.0516768	1.30132	0.281038	1.14254
Mocs2	molybdenum cofactor synthesis 2	0.00318309	-2.12484	0.0135736	-1.77091	0.794065	-1.05017	0.483455	1.14254
Ubl4	ubiquitin-like 4	5.32985e-07	-2.28561	1.39275e-06	-2.07436	0.55222	1.0363	0.0498375	1.14184
Txnip	thioredoxin interacting protein	0.00662943	-3.28884	0.00217965	-4.27402	0.263143	1.48308	0.697201	1.14123
Sgca	sarcoglycan, alpha (dystrophin-associated glycoprotein)	0.00558881	1.66095	0.000836085	2.01563	0.660884	-1.06349	0.357362	1.14109
Cldn8	claudin 8	3.25661e-05	-3.97185	7.5457e-05	-3.41004	0.902724	-1.0211	0.449509	1.14068
Slc38a1	solute carrier family 38, member 1	0.00221905	2.20962	0.00218318	2.21447	0.492911	1.13746	0.485805	1.13996
Cit	Citron	3.39394e-05	2.01864	6.34602e-06	2.41456	0.580524	-1.05004	0.163029	1.13913
Galm	galactose mutarotase (aldose 1-epimerase)	8.05974e-06	-4.88598	9.58167e-05	-3.09114	0.0711244	-1.38773	0.432641	1.13901
LOC687022	similar to SEC22 vesicle trafficking protein-like 3	5.54643e-08	-5.39555	6.26818e-08	-5.25665	0.271196	1.10915	0.177301	1.13846
Atp1a1	ATPase, Na+/K+ transporting, alpha 1 polypeptide	1.94956e-08	2.86403	1.80851e-08	2.89302	0.037151	1.12704	0.0267984	1.13845
Crebl2	cAMP responsive element binding protein-like 2	0.0418893	-1.85524	0.0237478	-2.03675	0.409496	1.24896	0.627253	1.13765
NFIB	nuclear factor I/B	1.91048e-05	1.91288	4.00113e-06	2.22524	0.763815	-1.02275	0.113079	1.13742
Ipo7	importin 7	2.38573e-05	1.97656	7.25861e-06	2.22595	0.906664	1.00953	0.140182	1.1369
Ophn1	oligophrenin 1	0.526659	-1.07127	0.00976534	-1.42003	0.00429249	1.50664	0.253272	1.13661
Cdca2	cell division cycle associated 2	0.0140549	1.58306	0.000364981	2.37559	0.0951296	-1.32028	0.408642	1.1366
Fads1	fatty acid desaturase 1	0.720779	1.12116	0.014662	2.60509	0.049191	-2.04505	0.690153	1.13619
Nup35	nucleoporin 35	0.000186359	1.66669	1.45545e-05	2.07484	0.274029	-1.09655	0.144617	1.13528
Gmnn	geminin	1.12339e-05	2.58183	1.44799e-05	2.50066	0.145676	1.17203	0.233938	1.13519
Eef2k	eukaryotic elongation factor-2 kinase	4.64206e-06	-4.08851	3.09465e-06	-4.41824	0.154812	1.22647	0.358521	1.13493
TCF7L2	transcription factor 7-like 2 (T-cell specific, HMG-box)	0.189678	-1.32001	0.0173041	-1.78499	0.0579881	1.53464	0.531961	1.13488
C1r	complement component 1, r subcomponent	0.000333129	4.7663	0.000493174	4.35616	0.431736	1.24163	0.641566	1.13479
Aars	alanyl-tRNA synthetase	2.14343e-05	2.40859	2.78603e-05	2.33509	0.153759	1.16997	0.241621	1.13427
Cep70	centrosomal protein 70kDa	6.96212e-05	-2.14696	0.00118338	-1.64911	0.212334	-1.14817	0.252746	1.13388
Heatr1	HEAT repeat containing 1	1.90836e-05	1.97632	3.61923e-06	2.34245	0.572544	-1.04573	0.13795	1.13343
Bin2a	beta-galactosidase-like protein	3.63856e-05	-2.09758	0.000451862	-1.67375	0.296672	-1.10605	0.203843	1.13306
Nhp2	NHP2 ribonucleoprotein homolog (yeast)	3.1738e-05	2.08551	5.35731e-06	2.54661	0.418925	-1.07779	0.19336	1.13297
Clpb	ClpB caseinolytic peptidase B homolog (E. coli)	6.6464e-07	-3.09443	5.95824e-07	-3.14467	0.120321	1.15083	0.162326	1.13244
Anpep	alanyl (membrane) aminopeptidase	6.99642e-07	2.33265	1.24842e-06	2.19367	0.0159732	1.204	0.076076	1.13227
Snx12	sorting nexin 12	0.000216019	-2.00908	0.0026888	-1.598	0.365449	-1.1108	0.290977	1.13183
Snx12	sorting nexin 12	0.000216019	-2.00908	0.0026888	-1.598	0.365449	-1.1108	0.290977	1.13183
Plp1	proteolipid protein 1	1.91093e-07	-2.45401	5.21947e-06	-1.79228	0.00828428	-1.20981	0.0534399	1.13176
Map3k1	mitogen activated protein kinase kinase kinase 1	1.31969e-05	-2.00927	1.58222e-05	-1.97556	0.187147	1.11272	0.133262	1.13171
LOC679462	similar to Tetraspanin-15 (Tspan-15) (Transmembrane 4 superfamily member 15) (Tetraspan	2.28685e-06	-3.51459	4.49857e-06	-3.15692	0.882014	1.01632	0.275958	1.13147
F2rl2	coagulation factor II (thrombin) receptor-like 2	3.37707e-06	4.63831	6.42754e-06	4.09108	0.103901	1.28278	0.389542	1.13144
LOC100360982	avian reticuloendotheliosis viral (v-rel) oncogene related B	1.10641e-05	2.44672	8.31093e-06	2.53396	0.371037	1.09184	0.221586	1.13077
Lynx1	Ly6/neurotoxin 1	2.5692e-06	-3.46029	4.49007e-06	-3.16815	0.752148	1.03523	0.279683	1.1307
Nat13	N-acetyltransferase 13	4.1371e-05	1.90273	9.12253e-06	2.20434	0.767379	-1.02473	0.162709	1.13056
Ces2l	carboxylesterase 2-like	1.61564e-06	-2.29144	2.31724e-05	-1.78832	0.0964128	-1.1336	0.103066	1.13033
Hs3st6	heparan sulfate (glucosamine) 3-O-sulfotransferase 6	6.60169e-06	-2.42739	5.01067e-06	-2.50919	0.108045	1.16781	0.192667	1.12974
Zfp593	zinc finger protein 593	1.03187e-07	-5.96238	2.37836e-07	-4.9741	0.569945	-1.06135	0.260559	1.1294
Mboat2	membrane bound O-acyltransferase domain containing 2	0.00368273	-2.57084	0.00041457	-3.8476	0.0544846	1.69006	0.616228	1.12924
Gatsl3	GATS protein-like 3	2.33668e-05	-2.41749	7.35991e-05	-2.12292	0.935507	-1.00849	0.264441	1.12917
Igf2r	insulin-like growth factor 2 receptor	0.0358193	1.54245	0.00292781	2.06528	0.350011	-1.18614	0.501018	1.12884
Rb1	retinoblastoma 1	2.37073e-05	-2.21427	7.93058e-06	-2.51375	0.0264604	1.28143	0.221424	1.12877
Elmo2	engulfment and cell motility 2	4.35635e-07	-3.35871	1.61894e-07	-3.95934	0.00835347	1.33021	0.179147	1.12842
Cyp39a1	cytochrome P450, family 39, subfamily a, polypeptide 1	1.91443e-05	-2.48575	0.000241104	-1.89066	0.170821	-1.16522	0.268879	1.12833
RGD1305311	Similar to hypothetical protein FLJ22527	0.000173342	-2.70282	0.001165	-2.10348	0.412433	-1.13961	0.450128	1.12751
Eprs	glutamyl-prolyl-tRNA synthetase	4.21717e-05	1.67483	2.91498e-06	2.09458	0.144233	-1.10941	0.0987629	1.12729
Mustn1	musculoskeletal, embryonic nuclear protein 1	2.77864e-06	-2.34845	1.02565e-05	-2.04967	0.830498	-1.01641	0.142312	1.12727
Rapgefl1	Rap guanine nucleotide exchange factor (GEF)-like 1	1.04939e-06	-3.16378	2.28459e-06	-2.83032	0.930187	1.00794	0.209595	1.12669
Degs1	degenerative spermatocyte homolog 1, lipid desaturase (Drosophila)	6.63809e-06	2.2534	1.0099e-06	2.8318	0.199257	-1.1163	0.170308	1.12576
LOC500688	Similar to a disintegrin and metalloprotease domain 4	7.12294e-08	-2.40696	1.707e-07	-2.19343	0.607018	1.02556	0.0366438	1.1254
Serpine2	serine (or cysteine) peptidase inhibitor, clade E, member 2	0.00165773	3.02593	0.00147455	3.09191	0.696131	1.10136	0.633623	1.12538
Lin7a	lin-7 homolog a (C. elegans)	0.0172789	-1.42061	0.172252	1.19231	0.00826396	-1.50513	0.34363	1.12536
Dynll2	dynein light chain LC8-type 2	1.68376e-06	-2.41577	4.72179e-06	-2.15979	0.934336	1.00607	0.135923	1.12531
Hsp90b1	heat shock protein 90kDa beta (Grp94), member 1	1.09995e-06	2.20671	5.69826e-07	2.368	0.454556	1.04866	0.0866045	1.1253
Adamtsl1	ADAMTS-like 1	2.51605e-06	8.43517	1.88041e-06	9.16586	0.853584	1.0352	0.534901	1.12487
Bcas3	breast carcinoma amplified sequence 3	0.00051969	-2.01993	0.00931837	-1.53487	0.246725	-1.17039	0.378836	1.12443
Lgi1 /// LOC100361792	leucine-rich, glioma inactivated 1 /// leucine-rich glioma-inactivated protein 1-like	0.8243	-1.029	0.00134085	-1.82062	0.000562601	1.98856	0.375919	1.12392
UGGT1	UDP-glucose glycoprotein glucosyltransferase 1	7.06923e-08	2.0526	4.1286e-08	2.16001	0.126331	1.06803	0.0163411	1.12392
Hddc3	HD domain containing 3	4.613e-05	-2.256	0.000266234	-1.88312	0.550141	-1.06601	0.287583	1.12383
Tmem38a	transmembrane protein 38a	6.75852e-06	-2.29712	1.17554e-06	-2.84959	0.0033612	1.39385	0.186533	1.12361
Crygs	crystallin, gamma S	0.0464616	-2.41962	0.337674	-1.46661	0.336144	-1.4685	0.764477	1.12346
Pabpc4	poly(A) binding protein, cytoplasmic 4	4.65862e-09	3.26574	2.07733e-09	3.70782	0.815704	-1.01089	0.0324546	1.12314
ARHGAP29	Rho GTPase activating protein 29	0.0151884	2.2045	0.0312209	1.95437	0.384114	1.26687	0.663291	1.12313
Slc25a29	solute carrier family 25, member 29	1.54674e-05	-2.05385	6.1761e-05	-1.81258	0.906238	-1.00953	0.177166	1.12241
Myo5c	myosin VC	6.33994e-07	-3.25816	3.09017e-06	-2.61281	0.243078	-1.11164	0.20845	1.12176
SEC14L3	SEC14-like 3 (S. cerevisiae)	1.71517e-05	-3.74132	5.0484e-05	-3.11856	0.654885	-1.06966	0.45185	1.12157
LOC100361585	rCG31991-like	3.59656e-05	-1.87537	1.35122e-05	-2.05191	0.0281838	1.22704	0.172425	1.12148
Nars	asparaginyl-tRNA synthetase	2.63885e-08	2.42585	1.92671e-08	2.51502	0.0988699	1.08143	0.0259326	1.12117
Sipa1	signal-induced proliferation-associated 1	8.62513e-05	2.33981	6.23391e-05	2.43492	0.548886	1.0759	0.362059	1.11963
RGD1310429	similar to Protein Njmu-R1	0.000190528	-2.27088	0.000511893	-2.02907	0.997196	-1.00046	0.400958	1.11866
Fam132a	family with sequence similarity 132, member A	1.12119e-05	2.29051	1.39166e-05	2.23661	0.15279	1.14559	0.228804	1.11863
Gldc	glycine dehydrogenase (decarboxylating)	1.48931e-05	-3.50411	3.71407e-05	-3.02405	0.79518	-1.03697	0.435453	1.11744
Kctd15	potassium channel tetramerisation domain containing 15	5.27376e-05	-2.01692	0.00034314	-1.70816	0.556064	-1.05687	0.253226	1.11722
SPRED2	sprouty-related, EVH1 domain containing 2	1.49701e-05	-2.02508	0.000106917	-1.71109	0.463397	-1.0604	0.187274	1.11609
LOC100362483	H2-GS14-2 antigen	0.579497	-1.40877	0.274979	-2.00459	0.459182	1.58642	0.859159	1.11489
Cdh3	cadherin 3	3.15594e-08	3.70907	5.11552e-08	3.43031	0.0187055	1.20507	0.125886	1.1145
Thop1	thimet oligopeptidase 1	9.34399e-06	2.83175	2.45131e-06	3.46666	0.396092	-1.09915	0.336706	1.11377
Tfrc	transferrin receptor	3.79761e-05	3.76571	3.67951e-05	3.78765	0.552721	1.10598	0.530615	1.11242
Cpb1	carboxypeptidase B1 (tissue)	1.14465e-08	-3.42758	3.54487e-07	-2.21424	0.000230917	-1.39192	0.0772324	1.11211
Aimp2	aminoacyl tRNA synthetase complex-interacting multifunctional protein 2	3.47527e-06	1.98309	5.90062e-07	2.37061	0.26769	-1.07512	0.119231	1.11189
Mad2l1	MAD2 mitotic arrest deficient-like 1 (yeast)	0.000167388	2.26064	1.11323e-05	3.28573	0.0616213	-1.3073	0.415341	1.11179
Fam171a1 /// LOC684862	family with sequence similarity 171, member A1 /// hypothetical protein LOC684862	2.36572e-07	8.15793	2.19403e-06	4.81714	0.00132975	1.8828	0.443408	1.11177
Tmem218	transmembrane protein 218	5.50036e-06	-2.51086	1.68208e-05	-2.20849	0.803137	-1.02264	0.257515	1.11174
Cinp	cyclin-dependent kinase 2-interacting protein	3.82058e-05	2.03332	5.74879e-06	2.50252	0.27498	-1.10743	0.259903	1.11136
LOC100361122	SRY-box containing gene 9	5.4789e-05	2.83574	0.00010918	2.57415	0.170786	1.22429	0.455019	1.11135
Cdca4	cell division cycle associated 4	1.82134e-06	1.72699	2.14327e-07	2.05641	0.160079	-1.07146	0.0453478	1.11134
Kcnj3	potassium inwardly-rectifying channel, subfamily J, member 3	1.65914e-06	-3.91401	1.63219e-05	-2.73693	0.0508854	-1.28702	0.365871	1.11115
Scd1	stearoyl-Coenzyme A desaturase 1	0.0139218	2.24806	0.00633893	2.57963	0.903242	-1.03296	0.694774	1.11088
Hsd17b2	hydroxysteroid (17-beta) dehydrogenase 2	0.000599952	-2.27179	0.00235515	-1.93033	0.709511	-1.05971	0.504855	1.11058
Ifitm2	interferon induced transmembrane protein 2	0.000229994	3.21331	0.000836546	2.60959	0.129438	1.36702	0.587474	1.11018
Wnt6	wingless-type MMTV integration site family, member 6	2.79827e-07	-2.87373	9.38319e-07	-2.46632	0.485732	-1.05059	0.16381	1.10908
RGD1565800	Similar to hypothetical protein FLJ20674	3.72644e-08	-2.26962	4.49684e-08	-2.22609	0.0733903	1.08704	0.0348348	1.1083
Txndc17	thioredoxin domain containing 17	6.20334e-06	2.12971	2.25275e-06	2.37341	0.935894	-1.00604	0.195802	1.10774
Alox12e	arachidonate 12-lipoxygenase, epidermal	2.33127e-06	-3.82385	6.01956e-06	-3.26465	0.633299	-1.05764	0.392826	1.10745
Hnrnpa2b1	Heterogeneous nuclear ribonucleoprotein A2/B1	1.88474e-05	-2.40772	5.98764e-05	-2.11513	0.781423	-1.02848	0.330031	1.10681
Lpl	lipoprotein lipase	2.4282e-06	11.098	1.53576e-06	12.8802	0.82053	-1.04896	0.633186	1.10642
Crygc	crystallin, gamma C	0.0840895	-1.91032	0.0580239	-2.066	0.600217	1.19613	0.766739	1.10599
Zfp61	zinc finger protein 61	1.29899e-05	-2.16864	3.4887e-05	-1.96689	0.970912	1.00309	0.254041	1.10598
Rpia	ribose 5-phosphate isomerase A	0.0733898	-1.63984	0.00678867	-2.38479	0.0833387	1.60787	0.686869	1.10561
Bard1	BRCA1 associated RING domain 1	0.000361412	1.79673	5.77027e-05	2.14714	0.454937	-1.0811	0.34253	1.10538
Golsyn	Golgi-localized protein	0.000635481	-5.42852	0.00123234	-4.58719	0.831556	-1.07108	0.757785	1.10487
Tek	TEK tyrosine kinase, endothelial	0.0434224	-1.97851	0.0382123	-2.02522	0.67741	1.13077	0.735604	1.10469
Unc5c	unc-5 homolog C (C. elegans)	0.00224996	-2.05195	0.000919802	-2.29857	0.228317	1.2368	0.560107	1.10411
Slc7a1	solute carrier family 7 (cationic amino acid transporter, y+ system), member 1	0.000655921	1.6629	6.18313e-06	2.67735	0.00393106	-1.45926	0.328025	1.10333
Ankrd42	ankyrin repeat domain 42	8.1027e-05	-2.04343	0.000561128	-1.71192	0.442502	-1.08188	0.342436	1.1033
Hspd1	heat shock protein 1 (chaperonin)	1.42108e-06	1.84297	3.90373e-07	2.06054	0.78867	-1.01347	0.0763636	1.10319
Phospho1	phosphatase, orphan 1	6.30552e-07	-8.65067	2.62909e-06	-5.99481	0.117414	-1.30861	0.541413	1.10271
Ptpn14	Protein tyrosine phosphatase, non-receptor type 14	8.85551e-05	-3.07341	0.000143524	-2.85137	0.888531	1.02268	0.547191	1.10232
Dcaf4	DDB1 and CUL4 associated factor 4	2.18461e-05	-2.27845	0.00012856	-1.90164	0.398331	-1.08707	0.328857	1.10218
Taf1d	TATA box binding protein (TBP)-associated factor, RNA polymerase I, D, 41kDa	0.000553563	2.09315	0.000620826	2.0662	0.433775	1.11635	0.487912	1.10198
LOC679342	hypothetical protein LOC679342	2.75255e-06	3.15345	3.86801e-07	4.40542	0.0432139	-1.26784	0.355324	1.10189
Col14a1	collagen, type XIV, alpha 1	2.3765e-07	-11.4106	1.7992e-07	-12.4672	0.259521	1.20332	0.544486	1.10133
LOC100912086	uncharacterized LOC100912086	6.71787e-06	2.11885	1.19791e-05	2.00339	0.069464	1.16471	0.221703	1.10125
Ddx56	DEAD (Asp-Glu-Ala-Asp) box polypeptide 56	5.78615e-06	2.03632	5.17844e-07	2.65266	0.0374442	-1.18333	0.192807	1.10085
Sorcs1	sortilin-related VPS10 domain containing receptor 1	0.00822224	-2.36044	0.00956293	-2.30162	0.781749	1.0731	0.707411	1.10053
Ddx39	DEAD (Asp-Glu-Ala-Asp) box polypeptide 39	1.82789e-06	2.32949	2.69671e-07	2.95619	0.0726921	-1.15324	0.20304	1.10041
Fam178b	family with sequence similarity 178, member B	6.02059e-06	-2.17615	1.66357e-05	-1.97052	0.962287	-1.00363	0.23385	1.10036
Sigmar1	sigma non-opioid intracellular receptor 1	0.000513829	2.09316	0.000122774	2.49176	0.565623	-1.08234	0.491507	1.09987
Mre11a	MRE11 meiotic recombination 11 homolog A (S. cerevisiae)	0.00020416	1.5409	2.68159e-06	2.19115	0.00508018	-1.29337	0.196697	1.09945
Thsd7a	thrombospondin, type I, domain containing 7A	0.00024153	-2.26881	0.000349116	-2.17179	0.709156	1.05184	0.49154	1.09883
Taf9	TAF9 RNA polymerase II, TATA box binding protein (TBP)-associated factor	9.53426e-06	2.37376	7.1992e-06	2.45373	0.507817	1.06276	0.315612	1.09856
Pstpip1	proline-serine-threonine phosphatase-interacting protein 1	0.000163498	2.24785	0.000154623	2.2627	0.49504	1.0912	0.464138	1.0984
LOC100911253	uncharacterized LOC100911253	2.90538e-05	-2.21189	0.00173627	-1.54074	0.0211264	-1.30779	0.349267	1.09774
Emb	embigin homolog (mouse)	0.000278663	1.9491	0.000167068	2.05328	0.716296	1.04182	0.417322	1.0975
Fgfbp1	fibroblast growth factor binding protein 1	2.23235e-07	3.58149	3.13461e-08	5.15183	0.00909378	-1.31141	0.277065	1.09688
Hip1	huntingtin interacting protein 1	5.22043e-05	3.18767	9.71886e-05	2.89229	0.237789	1.2087	0.551659	1.0967
USP15	ubiquitin specific peptidase 15	6.68737e-05	-3.27374	0.00140268	-2.11919	0.0608374	-1.40923	0.575432	1.09621
LOC100365845	rCG26214-like	2.45723e-08	-2.23592	6.00313e-08	-2.05078	0.889782	1.00541	0.0409459	1.09618
Npm1	nucleophosmin (nucleolar phosphoprotein B23, numatrin)	8.22914e-10	9.07962	6.63289e-10	9.64754	0.664166	1.03082	0.213489	1.0953
Casc5	cancer susceptibility candidate 5	0.00441116	1.74406	0.000465381	2.23804	0.295989	-1.17186	0.540033	1.09504
Tox3	TOX high mobility group box family member 3	0.00144287	-2.40157	0.00410277	-2.08043	0.781774	-1.05425	0.635955	1.09496
Lrpprc	leucine-rich PPR-motif containing	1.5084e-07	-2.54813	2.9959e-07	-2.3548	0.842283	1.01143	0.141112	1.09446
Cyfip2	cytoplasmic FMR1 interacting protein 2	1.9585e-08	-6.33995	8.70719e-09	-7.74165	0.00880942	1.3358	0.317061	1.09394
LOC100911177	uncharacterized LOC100911177	0.000110768	2.21887	4.6444e-05	2.46187	0.902131	-1.01452	0.453397	1.09364
Adh1	alcohol dehydrogenase 1 (class I)	5.29356e-05	-6.75372	0.000613003	-3.80058	0.0831064	-1.62496	0.724743	1.09358
Smurf1	SMAD specific E3 ubiquitin protein ligase 1	0.00459891	1.72392	0.00093643	2.03992	0.588367	-1.08209	0.540717	1.09353
Rnf167	ring finger protein 167	3.77849e-09	-2.14974	2.31636e-08	-1.8375	0.0436809	-1.07009	0.0135911	1.0933
Ptgfrn	prostaglandin F2 receptor negative regulator	4.32138e-05	1.96244	3.09816e-05	2.02574	0.518937	1.05841	0.323604	1.09255
Syncrip	synaptotagmin binding, cytoplasmic RNA interacting protein	6.22082e-07	2.26712	9.30273e-08	2.84345	0.0443103	-1.14839	0.16738	1.09215
Chd6	chromodomain helicase DNA binding protein 6	0.00739573	-1.64055	0.000467833	-2.20118	0.0252946	1.46449	0.546465	1.09149
Mboat2	membrane bound O-acyltransferase domain containing 2	0.0043572	-2.51121	0.000551966	-3.65586	0.0835026	1.58896	0.71846	1.09146
Slc2a1	solute carrier family 2 (facilitated glucose transporter), member 1	5.05292e-06	3.60513	2.20675e-06	4.18098	0.625715	-1.06257	0.485531	1.09144
Acsf2	acyl-CoA synthetase family member 2	6.85964e-05	2.00473	0.000132574	1.88372	0.145331	1.16114	0.374211	1.09106
Enah	enabled homolog (Drosophila)	5.36623e-09	8.70628	7.70741e-09	7.90294	0.0596606	1.20142	0.330516	1.09056
MGC112715	platelet receptor Gi24	0.00202233	2.09442	0.000448539	2.5596	0.508033	-1.12076	0.613143	1.09042
Serpinb10	serine (or cysteine) peptidase inhibitor, clade B (ovalbumin), member 10	2.38329e-11	305.695	2.32084e-11	311.583	0.564063	1.0697	0.46231	1.0903
Fam5b	family with sequence similarity 5, member B	0.000103252	-3.84247	0.0396354	-1.59399	0.00308365	-2.21159	0.662113	1.08999
Rfc1	replication factor C (activator 1) 1	1.84369e-05	-2.11321	1.744e-05	-2.12524	0.301299	1.09614	0.330212	1.08994
Smarca2	SWI/SNF related, matrix associated, actin dependent regulator of chromatin, subfamily a	6.89828e-08	-2.55094	4.80641e-08	-2.66605	0.0323258	1.13823	0.126716	1.08909
Rps6ka6	Ribosomal protein S6 kinase polypeptide 6	7.49892e-07	7.2156	3.15479e-07	9.11793	0.330636	-1.16035	0.56903	1.08902
Cyp1a1	cytochrome P450, family 1, subfamily a, polypeptide 1	0.0028626	-4.75273	0.00195884	-5.27469	0.621145	1.20834	0.823123	1.08877
Cmbl	carboxymethylenebutenolidase homolog (Pseudomonas)	1.32719e-09	-7.1532	2.24418e-07	-2.78953	9.04866e-07	-2.35559	0.219936	1.0886
Cenpi	centromere protein I	0.00112187	2.84115	0.000719201	3.06614	0.969929	1.00824	0.699545	1.08808
Slc39a2	solute carrier family 39 (zinc transporter), member 2	0.00113098	2.99787	0.000381011	3.67039	0.609528	-1.1253	0.714017	1.08801
Thg1l	tRNA-histidine guanylyltransferase 1-like (S. cerevisiae)	6.9564e-06	2.0519	2.99251e-06	2.23409	0.990884	-1.00083	0.263131	1.08789
Plekha6	Pleckstrin homology domain containing, family A member 6	4.97703e-09	-3.32414	9.04576e-09	-3.04598	0.930903	-1.00413	0.107921	1.08684
SNRPA1	small nuclear ribonucleoprotein polypeptide A'	9.62415e-07	1.89658	2.10648e-07	2.17894	0.276329	-1.05773	0.123609	1.08618
Trim44	Tripartite motif-containing 44	0.00773009	-1.61049	0.925867	1.01305	0.0166212	-1.50282	0.559649	1.08563
Slc7a1	solute carrier family 7 (cationic amino acid transporter, y+ system), member 1	0.00896921	1.54329	0.000366572	2.10672	0.106817	-1.25844	0.538338	1.08474
Oxr1	oxidation resistance 1	4.81364e-07	-4.19852	9.32045e-07	-3.73213	0.712299	-1.03833	0.439157	1.08343
Capn3	calpain 3	9.63282e-06	-2.18775	8.20156e-06	-2.2254	0.258382	1.10173	0.345489	1.08309
Sirt3	sirtuin (silent mating type information regulation 2 homolog) 3 (S. cerevisiae)	5.0865e-06	-2.10614	7.63249e-06	-2.02516	0.58061	1.04087	0.287531	1.08249
Cenpv	centromere protein V	1.47733e-06	6.69513	8.29235e-07	7.76716	0.656283	-1.07223	0.615776	1.08197
Vezf1	vascular endothelial zinc finger 1	2.74237e-06	-3.15737	9.62304e-06	-2.64617	0.351243	-1.10292	0.44959	1.08185
Gpnmb	glycoprotein (transmembrane) nmb	0.00019644	-2.87293	0.000124291	-3.08856	0.383198	1.1627	0.644309	1.08152
Btbd1	BTB (POZ) domain containing 1	1.72656e-07	-2.45944	1.51587e-07	-2.49696	0.122921	1.0978	0.186568	1.0813
Lppr5	lipid phosphate phosphatase-related protein type 5	0.00137904	-2.04981	0.01514	-1.58676	0.269307	-1.1948	0.616712	1.0812
Tmem8a	transmembrane protein 8A	5.3703e-05	3.66918	2.83262e-05	4.13881	0.805814	-1.04342	0.653632	1.08106
Asf1a	ASF1 anti-silencing function 1 homolog A (S. cerevisiae)	8.26763e-07	-2.90614	2.18232e-06	-2.55968	0.546257	-1.0507	0.352561	1.08056
Unc5c	unc-5 homolog C (C. elegans)	0.000564648	-2.4405	0.00125758	-2.19518	0.864036	-1.02903	0.645548	1.08039
Il6r	interleukin 6 receptor	0.000172129	-2.07634	0.00184203	-1.65918	0.220551	-1.15887	0.508213	1.07987
Galr2	galanin receptor 2	0.000299035	-2.14157	0.000359538	-2.09767	0.666662	1.05769	0.557393	1.07983
Cyp20a1	cytochrome P450, family 20, subfamily a, polypeptide 1	5.83618e-07	2.83731	2.33492e-07	3.2337	0.477137	-1.05623	0.330095	1.07903
Klf10	Kruppel-like factor 10	0.00428383	2.06088	0.00431618	2.05886	0.686677	1.07977	0.690439	1.07871
Igfbp5	insulin-like growth factor binding protein 5	7.45666e-06	-3.61487	5.34899e-05	-2.67038	0.109766	-1.25505	0.565702	1.0786
Nat1	N-acetyltransferase 1 (arylamine N-acetyltransferase)	0.000201259	-2.11085	0.000473	-1.93018	0.906533	-1.01417	0.534114	1.07833
Dars2	aspartyl-tRNA synthetase 2 (mitochondrial)	1.56841e-06	-2.82348	2.59366e-06	-2.64247	0.91628	1.00905	0.39118	1.07817
Kbtbd4	Kelch repeat and BTB (POZ) domain containing 4	5.57509e-08	-2.71778	2.32047e-07	-2.30039	0.116017	-1.09603	0.187208	1.07793
Cxcl12	chemokine (C-X-C motif) ligand 12 (stromal cell-derived factor 1)	0.000463249	-2.89369	0.000275182	-3.15522	0.412807	1.17528	0.69887	1.07787
Atg4c	ATG4 autophagy related 4 homolog C (S. cerevisiae)	1.70592e-06	-4.84691	1.47454e-06	-4.99636	0.433387	1.11103	0.573463	1.07779
Rab11fip4	RAB11 family interacting protein 4 (class II)	0.000185713	-2.12657	0.00160571	-1.71755	0.264396	-1.14919	0.537911	1.07741
Tenc1	tensin like C1 domain containing phosphatase (tensin 2)	2.64776e-05	-2.05469	6.23428e-06	-2.39997	0.0256212	1.25838	0.401122	1.07733
Prrt1	proline-rich transmembrane protein 1	0.000162066	-2.59404	0.000433631	-2.27914	0.711002	-1.05665	0.618557	1.07715
Ptpn14	Protein tyrosine phosphatase, non-receptor type 14	8.12452e-05	-3.02277	0.000198589	-2.64522	0.705083	-1.06096	0.635809	1.07707
Bxdc2	brix domain containing 2	3.89387e-05	1.78882	7.07015e-06	2.08169	0.309282	-1.08077	0.331537	1.07676
Mthfd2	methylenetetrahydrofolate dehydrogenase (NADP+ dependent) 2, methenyltetrahydrofolate c	0.000134628	5.27168	0.00067651	3.6923	0.115887	1.5366	0.770671	1.07624
Tpm1	tropomyosin 1, alpha	7.95389e-05	3.78323	0.000291707	3.01091	0.134112	1.35193	0.696367	1.07594
Igf2r	insulin-like growth factor 2 receptor	0.000484893	1.67212	3.83938e-05	2.0998	0.127709	-1.1674	0.446219	1.0757
Anxa1	annexin A1	0.000747511	2.77396	0.0305282	1.66015	0.016235	1.79722	0.71596	1.0756
Ard1a	ARD1 homolog A, N-acetyltransferase (S. cerevisiae)	9.45224e-06	2.33084	7.72588e-06	2.38549	0.57939	1.05084	0.421307	1.07548
Psca	prostate stem cell antigen	0.000172793	-2.48545	0.000255625	-2.36229	0.87927	1.02193	0.614366	1.07521
Gpr114	G protein-coupled receptor 114	0.000504311	-2.77956	0.0262171	-1.6418	0.0373278	-1.57515	0.70251	1.07481
Ngfr	nerve growth factor receptor (TNFR superfamily, member 16)	6.54795e-08	-5.82272	1.753e-07	-4.72707	0.181772	-1.14666	0.466078	1.07424
LOC100362120	rCG47836-like	0.000108366	-1.76729	1.4297e-05	-2.12587	0.0132356	1.29213	0.402258	1.07417
Cd97	CD97 molecule	6.0275e-05	2.65135	2.50554e-05	3.0076	0.677764	-1.0565	0.592275	1.0737
Hnrnpa1	heterogeneous nuclear ribonucleoprotein A1	2.97901e-09	2.67733	4.30577e-10	3.51278	0.000460798	-1.22275	0.0813253	1.07303
Hspe1	heat shock protein 1 (chaperonin 10)	2.40141e-07	1.8929	1.12121e-07	2.02095	0.907391	1.00482	0.117279	1.07279
Rab40b	Rab40b, member RAS oncogene family	7.82985e-05	-2.32487	0.00141	-1.72604	0.0818144	-1.25573	0.557101	1.07264
Rhebl1	Ras homolog enriched in brain like 1	5.51952e-06	-1.85468	1.55354e-06	-2.07516	0.0142159	1.19962	0.266403	1.07217
Cdk2ap1	CDK2-associated protein 1	7.13854e-09	2.48821	2.78829e-09	2.7912	0.247316	-1.04667	0.0945209	1.07175
Nfkb2	nuclear factor of kappa light polypeptide gene enhancer in B-cells 2, p49/p100	3.63245e-06	2.94563	3.9359e-06	2.91224	0.429042	1.0837	0.495055	1.07141
Pigp	Phosphatidylinositol glycan anchor biosynthesis, class P	0.0456895	-1.71195	0.00889772	-2.18396	0.207328	1.36621	0.770848	1.07094
Adfp	adipose differentiation related protein	4.47074e-06	7.59338	2.78513e-06	8.6543	0.746415	-1.06429	0.722517	1.07087
Tril	TLR4 interactor with leucine-rich repeats	7.1667e-07	-27.7915	1.98236e-06	-18.3893	0.189122	-1.41158	0.783494	1.07063
Eno1	enolase 1, (alpha)	2.18093e-08	2.12519	1.7167e-08	2.17516	0.233473	1.04589	0.0861389	1.07049
Plk1s1	polo-like kinase 1 substrate 1	6.21156e-05	-3.03518	0.000100039	-2.82332	0.976077	-1.00452	0.654057	1.0702
Apc2	adenomatosis polyposis coli 2	0.000148305	-2.19557	0.00092612	-1.81573	0.322303	-1.13122	0.584134	1.06893
Rnf4	ring finger protein 4	0.000719087	1.7603	9.92627e-05	2.13602	0.267749	-1.13522	0.548908	1.0689
Lrp1	low density lipoprotein-related protein 1 (alpha-2-macroglobulin receptor)	0.000353028	-1.72463	4.30709e-05	-2.09112	0.022694	1.29565	0.491672	1.06857
Cars	cysteinyl-tRNA synthetase	2.60446e-05	2.76815	6.93621e-05	2.43195	0.137774	1.21582	0.593204	1.06815
Nkrf	NFKB repressing factor	0.000114902	1.77927	1.74543e-05	2.11492	0.231248	-1.11288	0.447979	1.06808
Grwd1	glutamate-rich WD repeat containing 1	6.3226e-05	1.70781	8.89428e-06	2.01397	0.19605	-1.10448	0.379586	1.06771
Syngr1	synaptogyrin 1	2.40865e-05	-3.61906	2.49619e-05	-3.59643	0.700024	1.06095	0.670354	1.06762
LOC680200	similar to zinc finger protein 455	0.000431695	-2.02007	0.00424293	-1.62148	0.242668	-1.16697	0.607727	1.06757
Cryba2	crystallin, beta A2	0.050854	-4.17362	0.439071	-1.66011	0.206033	-2.35549	0.919223	1.06732
Bmyc	brain expressed myelocytomatosis oncogene	3.23396e-05	-2.94722	0.000117498	-2.464	0.404983	-1.12068	0.62881	1.0673
Tmem14c	transmembrane protein 14C	5.93799e-05	1.99301	1.72334e-05	2.26569	0.502366	-1.06524	0.490462	1.06719
Galm	galactose mutarotase (aldose 1-epimerase)	2.0462e-06	-4.40997	1.24952e-05	-3.2116	0.0742529	-1.28688	0.611897	1.06703
LOC298018	hypothetical LOC298018	0.000668365	1.8571	0.000131893	2.20034	0.389783	-1.11047	0.58924	1.06696
Pycard	PYD and CARD domain containing	1.40561e-05	-2.45138	1.11523e-05	-2.52209	0.36103	1.09742	0.520252	1.06666
Fam169a	family with sequence similarity 169, member A	0.00023132	-4.06329	0.000623087	-3.34456	0.573222	-1.13948	0.780472	1.06619
Pmm1	phosphomannomutase 1	1.76024e-06	-2.0455	1.25669e-06	-2.11246	0.137747	1.10058	0.305473	1.06569
Mtap	Methylthioadenosine phosphorylase	9.87426e-06	2.30548	3.17474e-06	2.64164	0.415184	-1.076	0.4819	1.06488
Ard1a	ARD1 homolog A, N-acetyltransferase (S. cerevisiae)	1.53881e-06	2.37506	8.14494e-07	2.55938	0.867464	-1.01197	0.38916	1.06486
protein kinase-like protein SgK196	Sgk196	3.23361e-07	-2.13867	2.16529e-07	-2.22649	0.0713571	1.10843	0.241267	1.06471
Mmp9	matrix metallopeptidase 9	5.14456e-05	31.7237	4.69946e-05	33.1467	0.968287	1.0183	0.891914	1.06398
Cyp27a1	cytochrome P450, family 27, subfamily a, polypeptide 1	7.02738e-05	-2.67542	8.07683e-05	-2.62468	0.754602	1.04345	0.651469	1.06363
Ms4a6b	membrane-spanning 4-domains, subfamily A, member 6B	0.00495737	3.034	0.00638405	2.88289	0.707167	1.11916	0.836902	1.06342
Cars	cysteinyl-tRNA synthetase	3.00543e-05	2.51794	8.4233e-05	2.22501	0.129885	1.20327	0.59097	1.06328
Ydjc	YdjC homolog (bacterial)	0.000781361	2.00238	0.000304022	2.23022	0.734613	-1.0476	0.65603	1.06318
Lmo4	LIM domain only 4	1.8665e-06	-2.55111	2.76874e-06	-2.43334	0.863298	1.01372	0.449833	1.06278
LOC100362321	rCG43335-like	0.000821972	-2.24069	0.000370408	-2.48945	0.315772	1.1806	0.705611	1.06263
Ucp2	uncoupling protein 2 (mitochondrial, proton carrier)	2.30015e-06	2.1333	3.44054e-06	2.05144	0.156211	1.10487	0.369442	1.06248
Zc3h6	zinc finger CCCH type containing 6	3.30844e-05	-3.891	2.02762e-05	-4.27585	0.371239	1.16744	0.720871	1.06236
Shpk	sedoheptulokinase	5.58914e-05	-2.19391	0.00109862	-1.65662	0.0619808	-1.24658	0.568189	1.06236
LOC679651	hypothetical protein LOC679651	6.69762e-05	-4.58858	0.000127688	-4.01494	0.72639	-1.07604	0.773239	1.06212
Rbp4	retinol binding protein 4, plasma	0.00112912	-2.3097	0.00117038	-2.29858	0.754453	1.05634	0.733775	1.06145
Kcnq1	potassium voltage-gated channel, KQT-like subfamily, member 1	9.38131e-05	2.47949	0.000132112	2.37416	0.43936	1.10831	0.650728	1.06123
Calm1	calmodulin 1	7.72555e-06	1.91654	2.75867e-06	2.10797	0.59244	-1.03646	0.382233	1.06119
Cerk	ceramide kinase	0.000175592	2.15576	8.23159e-05	2.35459	0.810882	-1.02936	0.626028	1.06108
Enpep	glutamyl aminopeptidase	0.000359466	2.00087	0.00156291	1.73453	0.12373	1.22387	0.627989	1.06095
Cct8	chaperonin containing Tcp1, subunit 8 (theta)	2.70801e-06	1.88399	1.0558e-06	2.04721	0.669875	-1.02437	0.309904	1.06078
Lgals5 /// Lgals9	lectin, galactose binding, soluble 5 /// lectin, galactoside-binding, soluble, 9	0.917218	-1.02978	0.0427627	1.93161	0.0506177	-1.87535	0.834918	1.06068
Trappc2	trafficking protein particle complex 2	3.97612e-05	-2.43889	7.90268e-05	-2.24754	0.840623	-1.02312	0.607174	1.06062
Ctbp2	C-terminal binding protein 2	5.41777e-05	2.23083	8.24079e-05	2.1306	0.341529	1.11017	0.586639	1.06029
Cpne4	copine IV	0.27566	-2.65333	0.109981	-4.47757	0.505203	1.78923	0.94578	1.06027
Dtnbp1	distrobrevin binding protein 1	3.18827e-07	-3.05501	2.60439e-07	-3.14634	0.261477	1.09175	0.445304	1.06006
Lypd2	Ly6/Plaur domain containing 2	5.64648e-06	-2.5088	9.50578e-06	-2.35837	0.968415	-1.00356	0.52234	1.06001
Pygb	phosphorylase, glycogen; brain	2.95453e-09	-2.89958	1.31444e-08	-2.41456	0.0113448	-1.133	0.166078	1.0599
Efr3a	EFR3 homolog A (S. cerevisiae)	6.35895e-07	1.82322	1.93334e-07	2.01422	0.360175	-1.04233	0.210407	1.05989
LOC691631	Hypothetical protein LOC691631	6.11106e-07	-2.21282	1.27086e-06	-2.05892	0.80891	-1.01415	0.331983	1.05975
Lmo4	LIM domain only 4	1.07259e-06	-3.6713	4.14551e-06	-2.97166	0.159686	-1.16588	0.574424	1.05967
Limd2	LIM domain containing 2	3.14442e-06	6.35717	8.10799e-06	5.10869	0.126742	1.31817	0.731491	1.0593
Ctsc	cathepsin C	0.00142944	2.31744	0.000224203	3.06144	0.246326	-1.24724	0.753147	1.05918
Selenbp1	selenium binding protein 1	4.92394e-08	-6.7821	2.66994e-07	-4.67369	0.0123868	-1.37018	0.57444	1.05907
Nap1l1	nucleosome assembly protein 1-like 1	3.99739e-07	2.0907	7.00905e-07	1.98543	0.0588226	1.11491	0.281023	1.05877
Rbp1	retinol binding protein 1, cellular	0.00387926	2.12179	0.0113274	1.84654	0.327013	1.21617	0.769794	1.0584
Mmd	monocyte to macrophage differentiation-associated	0.000711718	2.38525	0.00034686	2.63881	0.791942	-1.04559	0.738706	1.05807
Sptbn2	spectrin, beta, non-erythrocytic 2	1.16824e-07	-2.32546	4.37002e-08	-2.60318	0.00807396	1.18406	0.278326	1.05774
NR2F2	nuclear receptor subfamily 2, group F, member 2	1.59147e-05	-2.22098	4.48479e-05	-1.99812	0.577345	-1.05174	0.542096	1.05685
Tmem97	transmembrane protein 97	6.14081e-05	2.89499	5.09939e-05	2.9772	0.849788	1.02763	0.702069	1.05681
Zfp3	zinc finger protein 3	0.000370305	-2.08334	0.00141646	-1.81294	0.520376	-1.08754	0.670626	1.05665
CHST15	carbohydrate (N-acetylgalactosamine 4-sulfate 6-O) sulfotransferase 15	7.05739e-06	-2.20354	3.24196e-05	-1.90139	0.261911	-1.0975	0.500027	1.05595
Wipf1	WAS/WASL interacting protein family, member 1	2.5603e-08	-4.45329	5.92871e-08	-3.82787	0.205909	-1.10177	0.461757	1.05593
Ugdh	UDP-glucose dehydrogenase	2.22311e-07	1.75142	3.31955e-08	2.04322	0.0203164	-1.10568	0.161892	1.0551
Creg1	cellular repressor of E1A-stimulated genes 1	0.000390531	1.97441	1.15623e-05	3.06163	0.0107566	-1.47056	0.661425	1.05446
Sult1c3	sulfotransferase family, cytosolic, 1C, member 3	0.00627068	3.43579	0.00430457	3.75477	0.915044	-1.03768	0.881279	1.05316
Gys1	glycogen synthase 1, muscle	2.70909e-05	1.79252	4.81551e-06	2.08882	0.176759	-1.10648	0.469973	1.05316
Pak1ip1	PAK1 interacting protein 1	3.07989e-05	2.04428	1.67258e-05	2.17551	0.90508	-1.01054	0.560397	1.0531
Stard13	StAR-related lipid transfer (START) domain containing 13	0.270958	-1.20063	0.0857198	1.35391	0.0229224	-1.54366	0.74676	1.05305
G0s2	G0/G1switch 2	0.00516787	7.92796	0.00400962	8.7425	0.93387	-1.04764	0.927174	1.0526
Frem3	FRAS1 related extracellular matrix 3	2.90475e-05	-5.22772	1.23904e-05	-6.40679	0.22904	1.28983	0.800233	1.05245
Nme4	non-metastatic cells 4, protein expressed in	2.55526e-06	3.15885	5.05747e-06	2.86048	0.164403	1.16199	0.617767	1.05223
Arhgef2	rho/rac guanine nucleotide exchange factor (GEF) 2	2.81596e-06	3.62044	2.70424e-05	2.58528	0.00827452	1.47276	0.662343	1.05167
Steap3	STEAP family member 3	1.43615e-07	2.77492	1.012e-06	2.21076	0.00168335	1.32	0.425313	1.05163
Cachd1	cache domain containing 1	0.00167954	1.5693	0.415634	1.08706	0.00264373	1.51801	0.619356	1.05153
Sgsm2	small G protein signaling modulator 2	8.57623e-07	-2.14364	1.07526e-06	-2.09679	0.631035	1.02855	0.398817	1.05153
Ccnt2	cyclin T2	2.95192e-05	-2.1512	2.59889e-05	-2.18047	0.50228	1.0658	0.595018	1.05149
LOC100909675	uncharacterized LOC100909675	6.2033e-07	2.16858	1.21242e-07	2.59873	0.0443216	-1.13973	0.387465	1.05144
Fam148b	family with sequence similarity 148, member B	1.10463e-06	-3.63385	2.02712e-06	-3.29329	0.637634	-1.04945	0.62478	1.05142
Nup133	nucleoporin 133	2.95218e-07	1.85675	8.29722e-08	2.07125	0.175253	-1.06108	0.244801	1.05131
Cxcl14	chemokine (C-X-C motif) ligand 14	0.00414313	-2.03721	0.00892167	-1.85131	0.805331	-1.04677	0.787666	1.05125
Ywhah	tyrosine 3-monooxygenase/tryptophan 5-monooxygenase activation protein, eta polypeptide	1.15997e-07	2.25924	1.01004e-07	2.29237	0.469395	1.036	0.315027	1.05119
Crygd	crystallin, gamma D	0.100149	-2.95516	0.122752	-2.73426	0.96308	-1.02823	0.933962	1.05111
Mrpl40	mitochondrial ribosomal protein L40	1.92127e-05	-2.33487	7.43945e-05	-2.01983	0.34446	-1.0998	0.613055	1.05108
Ptplad2	protein tyrosine phosphatase-like A domain containing 2	6.09583e-07	-6.3007	1.63163e-06	-5.04978	0.224224	-1.1871	0.712051	1.05106
Id2	inhibitor of DNA binding 2	0.00420767	-2.5644	0.00299876	-2.71824	0.663262	1.11364	0.840918	1.05061
RGD1305222	similar to RIKEN cDNA 1810029B16	1.77301e-05	2.4896	7.48069e-06	2.7859	0.548592	-1.06512	0.637296	1.0506
Adcy3	adenylate cyclase 3	5.19319e-06	2.99545	5.25162e-06	2.99057	0.633119	1.0523	0.643867	1.05059
Hmx1	H6 family homeobox 1	0.0148544	-2.2842	0.0842696	-1.69301	0.376394	-1.28433	0.858262	1.05051
Lrrc59	leucine rich repeat containing 59	3.36897e-08	3.88697	1.24247e-08	4.66842	0.0776552	-1.14347	0.479672	1.05035
Mycl1	V-myc myelocytomatosis viral oncogene homolog 1, lung carcinoma derived (avian)	9.41664e-06	-2.35276	8.2883e-06	-2.38775	0.485097	1.06556	0.589661	1.04995
Prkar2b	protein kinase, cAMP dependent regulatory, type II beta	8.03348e-06	4.71561	6.89911e-06	4.86833	0.917378	1.01662	0.761486	1.04954
LOC100361733	rCG57079-like	0.00122904	2.56881	0.00100961	2.64783	0.92805	1.01819	0.809027	1.04951
Efcab2	EF-hand calcium binding domain 2	1.21267e-06	-2.50365	4.44796e-05	-1.762	0.00272501	-1.35405	0.516279	1.04938
RGD1311251	similar to RIKEN cDNA 4930550C14	3.00408e-05	-2.02613	0.165963	-1.13628	0.000226198	-1.69943	0.581975	1.04926
RGD1559690	similar to hypothetical protein FLJ25416	0.000618706	2.15623	0.000149356	2.58576	0.372275	-1.14291	0.742489	1.04925
Ift81	intraflagellar transport 81 homolog (Chlamydomonas)	3.16262e-05	-2.07826	0.00029357	-1.7029	0.122009	-1.16326	0.598291	1.04914
Eif4ebp2	eukaryotic translation initiation factor 4E binding protein 2	5.59026e-08	-2.09756	6.92113e-08	-2.05624	0.48981	1.0283	0.25018	1.04897
Aldh1a1	aldehyde dehydrogenase 1 family, member A1	5.48818e-06	-6.71611	8.21802e-06	-6.07781	0.779369	-1.05344	0.796955	1.04896
Morn1	MORN repeat containing 1	7.14666e-05	-2.11496	0.000434383	-1.77836	0.24498	-1.13413	0.648636	1.04862
Trpt1	tRNA phosphotransferase 1	0.000444051	-2.1416	0.000482499	-2.1212	0.784386	1.03839	0.731869	1.04838
Cpsf6	cleavage and polyadenylation specific factor 6	2.59159e-05	-2.40946	2.94945e-05	-2.37246	0.765317	1.0321	0.657638	1.0482
Ica1	islet cell autoantigen 1	0.0657606	-1.59155	0.76898	1.06853	0.057275	-1.62262	0.834976	1.04807
Nrg4	neuregulin 4	4.10947e-07	-9.81491	5.86559e-07	-8.85737	0.724956	-1.05755	0.768775	1.0478
Abcc5	ATP-binding cassette, sub-family C (CFTR/MRP), member 5	0.00104231	2.02487	0.000453757	2.23257	0.722251	-1.05324	0.753578	1.04684
LOC100174910	glutaredoxin-like protein	2.55888e-06	-2.27219	9.48261e-06	-1.99315	0.257602	-1.08907	0.532194	1.04676
Adcy6	adenylate cyclase 6	2.07097e-06	-2.51061	1.79287e-06	-2.55509	0.431542	1.06529	0.566198	1.04675
Ly6e	Lymphocyte antigen 6 complex, locus E	0.00550131	-1.8869	0.00251217	-2.07533	0.427967	1.15119	0.793647	1.04666
Hnrpll	heterogeneous nuclear ribonucleoprotein L-like	4.22056e-06	-2.03498	0.000163772	-1.53627	0.00657552	-1.26583	0.503029	1.04644
Tmem140	transmembrane protein 140	0.00201306	-2.15429	0.00401576	-1.97544	0.812528	-1.04273	0.799491	1.04585
Robo2	roundabout, axon guidance receptor, homolog 2 (Drosophila)	0.182528	-1.96588	0.0156099	-4.12297	0.128488	2.19251	0.925957	1.04541
Amigo2	adhesion molecule with Ig like domain 2	1.27388e-06	-2.95879	2.13442e-06	-2.75648	0.761538	-1.02687	0.614051	1.0453
Pank1	pantothenate kinase 1	0.000896191	-2.16715	0.00862946	-1.68356	0.204195	-1.23174	0.777483	1.04506
Lpcat1	lysophosphatidylcholine acyltransferase 1	2.68788e-07	4.59488	3.31836e-07	4.41113	0.409017	1.08823	0.664154	1.04472
Fh1	fumarate hydratase 1	4.81786e-06	2.06569	3.09233e-06	2.15822	0.996697	-1.00029	0.535695	1.04449
Macf1	microtubule-actin crosslinking factor 1	1.80424e-06	2.31118	1.28786e-05	1.90659	0.00865515	1.26577	0.544028	1.04419
Ttyh2	Tweety homolog 2 (Drosophila)	6.67552e-06	17.8073	9.21219e-06	15.7712	0.57132	1.17892	0.880795	1.04412
Anp32a	acidic (leucine-rich) nuclear phosphoprotein 32 family, member A	9.29014e-10	-2.87519	1.30395e-09	-2.75107	0.963412	-1.00155	0.229591	1.0435
RGD1564964	similar to WD repeat domain 11 protein	7.00911e-05	-2.16431	2.21139e-05	-2.4743	0.127717	1.1915	0.698887	1.04222
RGD1304567	similar to RIKEN cDNA A430005L14	1.99525e-06	-3.53069	4.53737e-06	-3.10191	0.421473	-1.09224	0.702429	1.04211
RGD1304587	similar to RIKEN cDNA 2310033P09	1.4399e-07	-2.40171	1.89704e-07	-2.32972	0.839669	1.01082	0.446673	1.04205
RGD1566052	similar to elongation protein 4 homolog	0.000239476	-2.03885	0.000417829	-1.92616	0.891122	-1.01617	0.728595	1.04165
Alox15	arachidonate 15-lipoxygenase	1.4761e-05	-2.40955	9.60358e-05	-1.97089	0.129198	-1.17382	0.678929	1.04153
Upb1	ureidopropionase, beta	0.000851457	-2.29605	0.060491	-1.42049	0.0256504	-1.55202	0.806816	1.04146
RGD1310951	similar to RIKEN cDNA E130308A19	0.0163586	-1.57876	0.000266106	-2.53827	0.00911956	1.67431	0.794768	1.04139
Fhit	fragile histidine triad gene	2.48702e-05	-3.21789	5.96383e-05	-2.81625	0.510898	-1.09747	0.773119	1.04114
Dhodh	dihydroorotate dehydrogenase	0.000225908	1.98218	3.98607e-05	2.4013	0.19809	-1.16386	0.720563	1.04088
Got1	glutamic-oxaloacetic transaminase 1, soluble (aspartate aminotransferase 1)	1.04055e-06	2.39234	6.71897e-07	2.51747	0.869493	-1.01128	0.564322	1.04057
Homez	homeobox and leucine zipper encoding	0.00243927	-2.01669	0.187027	-1.26185	0.0285057	-1.53702	0.814751	1.0398
Lmo7	LIM domain 7	0.0023113	2.32384	0.0571062	1.5317	0.0450051	1.57723	0.844763	1.0396
Cpsf2	cleavage and polyadenylation specific factor 2	6.95786e-07	1.70151	4.66685e-08	2.12091	0.00145224	-1.19906	0.340147	1.03956
Osgin1	oxidative stress induced growth inhibitor 1	1.97959e-06	-3.51819	3.30148e-06	-3.24174	0.688497	-1.04408	0.718762	1.03946
Idh2	isocitrate dehydrogenase 2 (NADP+), mitochondrial	2.60848e-08	2.63467	5.48148e-08	2.41436	0.025156	1.134	0.425531	1.03917
Apoe	apolipoprotein E	2.20371e-07	-4.98486	3.21426e-07	-4.61945	0.712438	-1.0388	0.71246	1.0388
Cd63	Cd63 molecule	2.88507e-06	8.90246	1.71656e-05	5.6005	0.0293886	1.65117	0.84599	1.03874
Tubb6	tubulin, beta 6	6.0434e-07	4.99431	4.10075e-07	5.42476	0.699075	-1.0466	0.752253	1.03783
Traf4af1	TRAF4 associated factor 1	0.0337781	1.60811	0.00260339	2.22417	0.160381	-1.33297	0.847441	1.0376
Fes	feline sarcoma oncogene	7.53275e-06	2.30465	3.32546e-06	2.53624	0.493767	-1.06069	0.665797	1.03753
Acot2	acyl-CoA thioesterase 2	1.79128e-06	-4.30472	2.20759e-06	-4.13821	0.98134	-1.00287	0.766026	1.03726
Npm1	nucleophosmin (nucleolar phosphoprotein B23, numatrin)	9.84066e-11	4.1717	9.28016e-11	4.21595	0.467957	1.02577	0.312512	1.03665
Xpo4	exportin 4	4.74172e-05	1.93219	5.87935e-06	2.39804	0.0624026	-1.19748	0.67876	1.03643
Optn	optineurin	0.00530395	-1.71835	0.000543043	-2.208	0.0812706	1.32942	0.817658	1.03461
Myo6	myosin VI	0.761062	-1.05957	0.0121265	-1.8098	0.0147518	1.76705	0.858106	1.03453
Zmynd11	zinc finger, MYND domain containing 11	1.34519e-06	-2.02368	2.48797e-06	-1.91625	0.713962	-1.02121	0.560571	1.03413
Sema3c	sema domain, immunoglobulin domain (Ig), short basic domain, secreted, (semaphorin) 3C	1.06006e-09	85.4905	1.24403e-09	78.2311	0.409513	1.12977	0.818355	1.03384
Trpm3	transient receptor potential cation channel, subfamily M, member 3	0.021109	-1.9171	0.00334427	-2.55257	0.197694	1.37648	0.887429	1.0338
Plaa	phospholipase A2, activating protein	5.67604e-07	1.88584	1.7539e-07	2.09169	0.151306	-1.07308	0.478348	1.03362
Armcx3	armadillo repeat containing, X-linked 3	8.7499e-09	22.3692	2.18543e-08	15.9165	0.0192766	1.4526	0.802685	1.03357
S100a4	S100 calcium-binding protein A4	2.38458e-09	34.0699	2.93348e-09	31.1065	0.344596	1.13169	0.797275	1.03325
Col18a1	collagen, type XVIII, alpha 1	6.82849e-09	12.7948	4.50173e-09	14.6851	0.330769	-1.11095	0.756778	1.03311
LOC100366237	prefoldin subunit 4-like	1.85798e-05	1.85809	1.55416e-06	2.36769	0.0158035	-1.23378	0.651707	1.03281
Tmem54	transmembrane protein 54	1.3326e-06	2.32006	9.27008e-07	2.41652	0.896524	-1.00889	0.641433	1.0324
Gnb4	guanine nucleotide binding protein (G protein), beta polypeptide 4	5.02928e-07	7.65983	4.5058e-07	7.88617	0.985436	1.00265	0.826772	1.03228
CPD	carboxypeptidase D	2.22387e-07	-2.55394	1.74846e-07	-2.63013	0.324543	1.06304	0.600688	1.03224
Laptm5	lysosomal protein transmembrane 5	0.000300652	1.98144	0.00018062	2.08995	0.851952	-1.02197	0.786453	1.03209
Gpr116	G protein-coupled receptor 116	5.87497e-06	-4.08505	1.66269e-06	-5.27131	0.0650261	1.33162	0.82029	1.03195
Sla	Src-like adaptor	7.84089e-05	-3.00655	0.000187892	-2.64057	0.528528	-1.1034	0.838732	1.0319
Emg1	EMG1 nucleolar protein homolog (S. cerevisiae)	0.000788774	2.0442	0.000130824	2.54948	0.202685	-1.2087	0.824327	1.03183
RGD1560398	RGD1560398	5.92963e-06	-2.01384	9.11699e-05	-1.61836	0.0227398	-1.20648	0.655416	1.03141
Tspan7	tetraspanin 7	6.75955e-09	5.51867	3.5036e-09	6.39796	0.122336	-1.12467	0.667241	1.03082
Pir	pirin (iron-binding nuclear protein)	1.28022e-07	-5.36815	2.56689e-07	-4.65063	0.276248	-1.12034	0.766686	1.0303
Lrrn3	leucine rich repeat neuronal 3	1.47977e-07	-34.1543	5.62735e-07	-19.5527	0.0347998	-1.69612	0.891057	1.02987
Nap1l1	nucleosome assembly protein 1-like 1	5.43337e-07	2.86252	4.95305e-07	2.899	0.825907	1.0168	0.699598	1.02975
SLC38A4	solute carrier family 38, member 4	3.70499e-07	4.97235	1.66256e-07	5.91769	0.20854	-1.15664	0.795339	1.02894
Tp53i11	tumor protein p53 inducible protein 11	6.60746e-05	4.44305	5.53267e-05	4.61325	0.961099	-1.00999	0.892124	1.02804
Spata2	spermatogenesis associated 2	1.58277e-07	-2.2304	3.274e-07	-2.07645	0.383343	-1.04497	0.579666	1.02791
Tnfaip3	tumor necrosis factor, alpha-induced protein 3	0.00129809	3.5268	0.000863452	3.83994	0.830561	-1.05934	0.918838	1.0278
Cenpv	centromere protein V	1.97078e-07	3.8845	2.03018e-07	3.8645	0.704936	1.03311	0.749665	1.02779
Nudt5	nudix (nucleoside diphosphate linked moiety X)-type motif 5	2.52512e-08	2.16025	1.09386e-08	2.3547	0.142418	-1.06073	0.473902	1.02761
Lsp1	lymphocyte-specific protein 1	0.0136815	-2.34449	0.0058663	-2.73931	0.519192	1.20034	0.923151	1.02733
Shisa4	shisa homolog 4 (Xenopus laevis)	6.16687e-06	2.20931	2.92811e-05	1.90058	0.0478678	1.19396	0.733781	1.02711
RT1-Bb	RT1 class II, locus Bb	0.143911	2.13993	0.139601	2.16038	0.972218	1.01702	0.956572	1.02674
Opa1	optic atrophy 1 homolog (human)	0.00242889	1.94604	0.0011642	2.12157	0.703996	-1.06206	0.86844	1.02649
Fetub	fetuin B	0.000100266	-3.6469	0.00373422	-2.08443	0.018872	-1.7048	0.890087	1.02627
Ehd2	EH-domain containing 2	2.92713e-06	2.68927	9.51747e-06	2.32976	0.08466	1.1841	0.774248	1.02581
Cat	catalase	3.37197e-05	1.88865	6.94582e-06	2.19839	0.135497	-1.13576	0.756989	1.02486
CPD	carboxypeptidase D	1.69202e-08	-2.7086	1.6908e-08	-2.70885	0.602585	1.02445	0.603939	1.02435
Hist1h2bc /// Hist1h2bcl1 /// Hist1h2bm	histone cluster 1, H2bc /// histone cluster 1, H2bc-like 1 /// histone cluster 1, H2bm	3.15434e-08	10.7205	1.98226e-08	12.3828	0.325964	-1.12765	0.839595	1.0243
Smc5	structural maintenance of chromosomes 5	8.23971e-06	2.1792	4.08156e-06	2.35208	0.512462	-1.05462	0.772871	1.02344
Fat1	FAT tumor suppressor homolog 1 (Drosophila)	5.20216e-08	2.28211	1.22411e-07	2.09532	0.0351605	1.11377	0.613634	1.02261
Man2a2	Mannosidase 2, alpha 2	1.1279e-05	-2.09886	2.71493e-05	-1.93089	0.445071	-1.06382	0.78675	1.02178
Ncf4	neutrophil cytosolic factor 4	0.000119312	2.55318	0.000130681	2.52228	0.809757	1.03417	0.877877	1.02165
Il1b	interleukin 1 beta	4.05273e-06	18.7203	2.7657e-06	21.7835	0.637028	-1.13905	0.937897	1.02157
Cfl2	cofilin 2, muscle	6.25527e-07	3.71303	1.30023e-07	4.98196	0.0189463	-1.31386	0.827183	1.02123
SSBP3	single stranded DNA binding protein 3	2.00268e-07	-2.39928	3.02357e-07	-2.29338	0.656598	-1.02507	0.713834	1.02059
Immt	inner membrane protein, mitochondrial	9.78868e-09	2.03561	6.61632e-09	2.11044	0.606405	-1.01603	0.515018	1.02041
Tyrobp	Tyro protein tyrosine kinase binding protein	0.000400152	3.72189	0.000152967	4.54913	0.446152	-1.19866	0.933414	1.01969
Efemp1	EGF-containing fibulin-like extracellular matrix protein 1	7.0705e-05	-3.93087	5.33469e-05	-4.15389	0.69507	1.07723	0.918992	1.0194
Sox13	SRY (sex determining region Y)-box 13	8.15688e-06	-2.65283	1.2695e-05	-2.50758	0.711687	-1.03787	0.848578	1.01932
Acot2	acyl-CoA thioesterase 2	7.58634e-05	-2.39585	3.79383e-05	-2.61847	0.388342	1.11364	0.877476	1.01896
RGD1559896	similar to RIKEN cDNA 2310022B05	8.409e-08	-1.9516	6.14205e-08	-2.0057	0.244178	1.04717	0.622942	1.01893
Klhl23	kelch-like 23 (Drosophila)	0.000141286	-2.57777	0.000163843	-2.52651	0.992006	-1.00145	0.897183	1.01882
Igf2	insulin-like growth factor 2	0.000109061	-2.19213	0.00183644	-1.66455	0.050352	-1.29287	0.872797	1.01862
LOC500105	similar to contactin associated protein-like 2 isoform a	0.00360915	2.10917	0.00380918	2.09418	0.893012	1.02582	0.922804	1.01853
Sh2b2	SH2B adaptor protein 2	1.82782e-07	4.99046	1.96706e-07	4.9158	0.744209	1.03344	0.859362	1.01798
Trpc3	transient receptor potential cation channel, subfamily C, member 3	0.000220392	-1.93058	3.34882e-06	-3.22874	0.00089024	1.70218	0.869011	1.01779
Npm1	nucleophosmin (nucleolar phosphoprotein B23, numatrin)	1.04017e-08	2.82177	8.84415e-09	2.88314	0.923089	-1.00436	0.70411	1.01732
Fam53a	family with sequence similarity 53, member A	6.54528e-05	-1.99811	1.88226e-05	-2.27569	0.146686	1.15853	0.856763	1.01721
Pdia5	protein disulfide isomerase family A, member 5	0.00101107	2.7465	0.000361163	3.26998	0.453617	-1.17131	0.937163	1.01647
Fam132a	family with sequence similarity 132, member A	3.25867e-05	5.07754	4.94756e-05	4.63414	0.596088	1.11365	0.935572	1.0164
Disp1	dispatched homolog 1 (Drosophila)	2.06792e-06	-6.12339	2.2533e-06	-6.00032	0.97913	-1.00406	0.916584	1.01638
Arl11	ADP-ribosylation factor-like 11	0.00603609	2.22698	0.0049356	2.29591	0.948855	-1.01442	0.942273	1.0163
Trub1	TruB pseudouridine (psi) synthase homolog 1 (E. coli)	0.00111822	1.55093	4.76917e-05	2.01445	0.0242056	-1.27852	0.862995	1.01592
Lrrc42	leucine rich repeat containing 42	2.45636e-05	-2.15754	4.00371e-05	-2.05224	0.706784	-1.03523	0.866467	1.01554
Nkain1	Na+/K+ transporting ATPase interacting 1	1.59085e-05	3.19331	3.7432e-05	2.80867	0.289542	1.1541	0.908589	1.01509
Mapk12	mitogen-activated protein kinase 12	1.19425e-05	-2.17731	2.19565e-05	-2.04706	0.581755	-1.04787	0.859141	1.01504
Tnnt3	troponin T type 3 (skeletal, fast)	0.00684873	-1.6248	0.000544837	-2.10588	0.0757954	1.31508	0.916394	1.01466
Ppt1	palmitoyl-protein thioesterase 1	1.00247e-06	-2.95946	9.06471e-06	-2.25132	0.0133262	-1.29562	0.863792	1.01461
Hsf2	heat shock transcription factor 2	5.90488e-06	3.18271	8.8483e-06	2.99471	0.514938	1.07804	0.900343	1.01436
Syngr1	synaptogyrin 1	0.000159376	-1.78245	4.23279e-05	-2.0086	0.162825	1.14274	0.876068	1.01408
Gad1	glutamate decarboxylase 1	2.44047e-08	-41.5477	3.70957e-08	-34.251	0.334626	-1.19631	0.938572	1.01398
Slc22a15	solute carrier family 22, member 15	3.48271e-06	2.06884	3.46451e-06	2.06988	0.84224	1.01337	0.836359	1.01388
Morn4	MORN repeat containing 4	8.79113e-05	-1.95622	5.92155e-05	-2.03289	0.592808	1.05289	0.891034	1.01317
Dpy19l1	dpy-19-like 1 (C. elegans)	2.61088e-05	2.01983	0.000109583	1.77758	0.123718	1.1512	0.877358	1.01313
LOC100912411	uncharacterized LOC100912411	0.0990226	-1.6024	0.00900544	-2.3768	0.145748	1.5026	0.960414	1.01302
Fam13c1	family with sequence similarity 13, member C1	6.80246e-06	-6.42359	3.77626e-05	-4.3666	0.0726237	-1.45231	0.945068	1.01292
Zfp426	zinc finger protein 426	4.80724e-07	-2.83576	4.9352e-07	-2.82575	0.900077	1.00931	0.862374	1.01288
Myc	myelocytomatosis oncogene	0.000360882	3.93423	0.000499484	3.68345	0.743474	1.0818	0.957497	1.01284
Muted	muted homolog (mouse)	3.90568e-05	-2.26225	7.15397e-05	-2.11737	0.608171	-1.05507	0.903485	1.01266
E2f6	E2F transcription factor 6	5.81361e-06	-2.15676	1.29662e-05	-1.99425	0.393682	-1.06809	0.868777	1.01254
Ninl	ninein-like	4.20913e-05	2.0077	0.00198241	1.47803	0.00624629	1.37537	0.889447	1.01252
Timm8a1	translocase of inner mitochondrial membrane 8 homolog a1 (yeast)	3.33316e-08	3.59029	1.41972e-08	4.15565	0.0637942	-1.14332	0.848406	1.01238
Trib2	tribbles homolog 2 (Drosophila)	7.92514e-06	-2.90225	5.27561e-05	-2.27651	0.0605159	-1.25928	0.910087	1.01238
Coro1a	coronin, actin binding protein 1A	0.00282029	3.14718	0.00394317	2.94702	0.781024	1.08076	0.965791	1.01202
Ubash3b	ubiquitin associated and SH3 domain containing, B	1.89866e-06	5.86706	3.3981e-06	5.14985	0.357055	1.15237	0.939143	1.0115
Ribc1	RIB43A domain with coiled-coils 1	0.000291026	-2.07223	0.0060464	-1.55621	0.0504497	-1.3165	0.926415	1.01146
2012-09-11	septin 11	7.45626e-05	-2.28085	0.0337324	-1.32869	0.00141938	-1.6976	0.922625	1.0112
Nudt13	nudix (nucleoside diphosphate linked moiety X)-type motif 13	7.69545e-06	-2.05238	2.15754e-05	-1.8693	0.278761	-1.08595	0.880846	1.01104
RGD1566386	similar to Hypothetical protein A430033K04	0.00675957	-1.8879	0.340525	-1.19457	0.0342722	-1.56365	0.953044	1.01072
Myl12b	myosin, light chain 12B, regulatory	4.16502e-08	-2.19339	7.67341e-08	-2.06804	0.252656	-1.04975	0.800399	1.01035
LOC100361900	hypothetical protein LOC100361900	0.0217269	5.2927	0.0392627	4.23175	0.700446	1.2634	0.986687	1.01014
Akr1c19	aldo-keto reductase family 1, member C19	0.0103568	-8.25629	0.0107452	-8.12794	0.992932	-1.00581	0.987944	1.00993
Ripk3	receptor-interacting serine-threonine kinase 3	0.00139991	2.46169	0.000213712	3.3322	0.159068	-1.3404	0.959775	1.00987
Grb10	growth factor receptor bound protein 10	0.00633056	-2.35187	0.798171	-1.06359	0.00991258	-2.18971	0.967525	1.00984
Upk1b	uroplakin 1B	6.73698e-07	-2.00126	5.6649e-07	-2.03302	0.632106	1.02505	0.860945	1.00903
Irf5	interferon regulatory factor 5	0.000478571	2.31093	0.000213645	2.57286	0.525016	-1.10344	0.9534	1.00897
Cdr2	cerebellar degeneration-related 2	2.31975e-07	3.94587	9.45719e-08	4.66417	0.101586	-1.17178	0.921564	1.00875
Arhgap9	Rho GTPase activating protein 9	3.65887e-05	3.85155	4.0347e-05	3.78235	0.875144	1.02704	0.9598	1.00859
Crlf1	cytokine receptor-like factor 1	1.55547e-07	-4.61634	1.71537e-07	-4.52914	0.910188	-1.01062	0.927648	1.00854
Zfp385a	zinc finger protein 385A	3.7961e-06	2.09041	2.90172e-05	1.75205	0.0235255	1.20309	0.90314	1.00836
Slc16a7	solute carrier family 16, member 7 (monocarboxylic acid transporter 2)	1.77461e-05	-5.53722	3.6931e-05	-4.70176	0.433473	-1.16871	0.968682	1.00769
Rcbtb2	regulator of chromosome condensation (RCC1) and BTB (POZ) domain containing prot	0.000200321	-3.00802	0.000853156	-2.42064	0.254916	-1.23332	0.965903	1.00757
Rhov	ras homolog gene family, member V	0.000227831	2.14916	0.000162236	2.23445	0.801763	-1.03192	0.952142	1.00752
RGD1565043	similar to Rho guanine nucleotide exchange factor (GEF) 10	0.000192734	-2.526	0.000141169	-2.6366	0.735347	1.05135	0.960972	1.00725
Krt13	keratin 13	2.4928e-05	2.34509	2.20673e-06	3.25076	0.011885	-1.3764	0.944413	1.00712
Kctd11	potassium channel tetramerisation domain containing 11	0.000544842	2.06899	0.00355744	1.70651	0.167161	1.22049	0.96083	1.00667
LOC502894	hypothetical protein LOC502894	3.61694e-06	2.17432	9.73463e-07	2.51552	0.079433	-1.14945	0.92787	1.0065
Cpd	carboxypeptidase D	7.04825e-09	-2.61917	2.9494e-09	-2.92952	0.0153316	1.12563	0.87303	1.00638
Atp6v0e2	ATPase, H+ transporting V0 subunit e2	4.77603e-08	-2.18507	3.98867e-08	-2.22505	0.557091	1.02474	0.878318	1.00632
Col18a1	collagen, type XVIII, alpha 1	0.00104899	2.17145	0.000763918	2.25994	0.832751	-1.03439	0.96944	1.00614
RGD1309313	similar to RIKEN cDNA 4930538D17	2.97908e-06	2.01171	8.06296e-07	2.29156	0.0750734	-1.13246	0.925667	1.00587
Ppm1j	protein phosphatase 1J	6.69631e-07	3.43455	5.60681e-06	2.54413	0.00854811	1.35775	0.949851	1.00575
Zfp329	zinc finger protein 329	9.24265e-05	-2.02382	7.14644e-05	-2.07742	0.753165	1.03238	0.954771	1.00575
Atmin	ATM interactor	1.31406e-05	-1.85716	3.29372e-06	-2.10548	0.0812356	1.13988	0.936121	1.00544
Ier5l	immediate early response 5-like	0.000416521	2.59386	0.000236292	2.82178	0.645626	-1.08203	0.974765	1.0054
Csrp2	cysteine and glycine-rich protein 2	1.03882e-07	-14.5799	7.9966e-08	-15.9704	0.541096	1.10117	0.972964	1.00529
Prkaa2	protein kinase, AMP-activated, alpha 2 catalytic subunit	7.34966e-06	-2.03795	2.53594e-05	-1.82609	0.172368	-1.11033	0.943434	1.00513
Icam1	intercellular adhesion molecule 1	7.47381e-09	28.887	1.88638e-08	19.9107	0.0239287	1.45794	0.972095	1.00491
C1qc	complement component 1, q subcomponent, C chain	0.00253842	2.32828	0.00733038	2.00847	0.458404	1.16453	0.981969	1.00457
Nat9	N-acetyltransferase 9 (GCN5-related, putative)	3.34216e-05	-2.48699	7.16136e-05	-2.26881	0.44795	-1.09152	0.970062	1.00426
Fam5b	family with sequence similarity 5, member B	0.000201301	-2.52016	0.121162	-1.28277	0.00159491	-1.95665	0.978099	1.00408
Ryr3	ryanodine receptor 3	0.32598	-1.24992	0.017926	-1.88281	0.088423	1.51207	0.986236	1.0038
Galr2	galanin receptor 2	9.53206e-05	-2.14956	6.53188e-05	-2.2418	0.680951	1.04659	0.974503	1.00353
LOC303590	similar to cactin CG1676-PA	0.00135639	-2.18633	0.0291395	-1.54082	0.0662428	-1.41402	0.983516	1.00348
PRKAR2A	protein kinase, cAMP-dependent, regulatory, type II, alpha	0.000298251	1.74796	4.20637e-05	2.09487	0.0894673	-1.1944	0.97144	1.0034
Plcb4	phospholipase C, beta 4	3.89669e-09	-5.17392	2.24127e-08	-3.73287	0.000734689	-1.38139	0.957429	1.00337
Slc35d1	Solute carrier family 35 (UDP-glucuronic acid/UDP-N-acetylgalactosamine dual transporte	8.94568e-06	-2.45116	1.29436e-05	-2.34689	0.666106	-1.04127	0.974059	1.00303
TANC1	tetratricopeptide repeat, ankyrin repeat and coiled-coil containing 1	1.40498e-05	-1.62312	8.35507e-07	-2.02062	0.00267531	1.2486	0.955768	1.00297
Ivd	isovaleryl coenzyme A dehydrogenase	8.66232e-05	-1.99903	6.70345e-05	-2.05075	0.772973	1.02886	0.976426	1.00291
NCOA3	nuclear receptor coactivator 3	3.82667e-06	-2.70368	3.48795e-06	-2.73703	0.872771	1.0149	0.978088	1.00254
RGD1307569	similar to Protein C21orf63 homolog precursor	0.000191885	3.45445	0.00116355	2.56285	0.154377	1.35102	0.990627	1.00232
Optn	optineurin	9.00374e-06	-2.19555	1.16646e-06	-2.80105	0.0146287	1.27872	0.97761	1.0023
Rg9mtd2	RNA (guanine-9-) methyltransferase domain containing 2	2.31254e-06	2.44593	1.10887e-06	2.67691	0.273937	-1.09245	0.98134	1.00182
Asmtl	acetylserotonin O-methyltransferase-like	0.00021713	-1.96768	0.000124552	-2.08286	0.596572	1.06036	0.987467	1.00172
Srgn	serglycin	6.06158e-05	4.241	1.75645e-05	5.5509	0.194613	-1.30687	0.993771	1.00152
Acad11	acyl-Coenzyme A dehydrogenase family, member 11	1.09792e-07	-2.60146	8.90087e-08	-2.66996	0.628545	1.02766	0.98157	1.00129
Zfp12	zinc finger protein 12	9.21145e-05	-2.35233	0.000154602	-2.21261	0.626507	-1.06193	0.992504	1.00115
Memo1	mediator of cell motility 1	1.28019e-07	2.27406	1.30029e-07	2.27034	0.957132	1.00264	0.983742	1.001
HLF	hepatic leukemia factor	9.88629e-07	-15.4788	6.61866e-07	-17.9209	0.495114	1.1589	0.996359	1.00097
Tc2n	tandem C2 domains, nuclear	1.00582e-07	-6.80707	1.49624e-07	-6.18987	0.405433	-1.09912	0.996112	1.00054
RGD1562012	RGD1562012	5.49501e-09	-2.73188	5.65849e-08	-2.11205	0.000171202	-1.29288	0.990865	1.00046
Htra3	HtrA serine peptidase 3	0.000149299	-2.03156	2.17335e-05	-2.53104	0.0708515	1.24556	0.998204	-1.00024
Clic2	chloride intracellular channel 2	0.0777311	-2.02171	0.00514856	-3.76831	0.111532	1.86332	0.999283	-1.00032
Plxna2	plexin A2	5.42326e-06	-2.32993	4.89049e-06	-2.35734	0.891085	1.01133	0.995772	-1.00044
Dkk3	dickkopf homolog 3 (Xenopus laevis)	8.8236e-07	-7.27949	6.0301e-07	-8.04886	0.516597	1.10512	0.997299	-1.00051
Ccdc74a	coiled-coil domain containing 74A	0.00021026	2.83224	0.00035523	2.61986	0.647293	1.08045	0.997264	-1.00058
Neo1	neogenin homolog 1 (chicken)	1.17005e-06	-3.85951	9.13638e-07	-4.03387	0.687669	1.04431	0.993808	-1.00083
Marcks	myristoylated alanine rich protein kinase C substrate	9.42041e-06	2.0084	2.0028e-06	2.35417	0.0538449	-1.17317	0.99057	-1.00086
Cd74	Cd74 molecule, major histocompatibility complex, class II invariant chain	5.31927e-07	24.0793	9.96957e-07	18.7729	0.2948	1.28129	0.996246	-1.00107
Hdac11	histone deacetylase 11	4.08658e-05	-2.77959	0.00011782	-2.41242	0.290832	-1.15396	0.990695	-1.00152
Atg2a	ATG2 autophagy related 2 homolog A (S. cerevisiae)	2.72666e-05	-2.00532	1.91542e-05	-2.07551	0.698448	1.03328	0.984156	-1.00167
Nrcam	neuronal cell adhesion molecule	4.0016e-06	-2.91798	0.126695	-1.17956	1.38151e-05	-2.47794	0.98657	-1.00168
Slco3a1	solute carrier organic anion transporter family, member 3a1	0.00044965	-2.93556	0.00011817	-3.71124	0.252369	1.26199	0.992709	-1.00178
Ssx2ip	synovial sarcoma, X breakpoint 2 interacting protein	2.30357e-08	-2.91645	4.07367e-08	-2.70623	0.16245	-1.0796	0.972321	-1.00178
Nme2	non-metastatic cells 2, protein (NM23B) expressed in	3.54894e-09	2.31808	2.15848e-09	2.44773	0.104427	-1.05814	0.947696	-1.00209
LOC689176	similar to transmembrane protein 64	3.13127e-05	-2.62276	0.000233512	-2.06444	0.069056	-1.27329	0.984982	-1.00224
Sox7	SRY (sex determining region Y)-box 7	3.73316e-08	13.0922	1.38322e-07	8.8123	0.0148682	1.48157	0.983207	-1.00277
Me2	malic enzyme 2, NAD(+)-dependent, mitochondrial	2.67712e-05	5.03439	1.83836e-05	5.48178	0.653771	-1.09195	0.988423	-1.00283
Ptprj	protein tyrosine phosphatase, receptor type, J	0.000153953	-2.98779	4.97676e-05	-3.61414	0.285743	1.20573	0.984726	-1.00324
Lrfn4	leucine rich repeat and fibronectin type III domain containing 4	7.0279e-06	2.76005	1.84666e-05	2.43846	0.258096	1.12809	0.973817	-1.00336
Htra1	HtrA serine peptidase 1	1.22193e-07	3.48407	6.54075e-08	3.86491	0.174051	-1.11307	0.963568	-1.00339
Slc39a8	solute carrier family 39 (zinc transporter), member 8	7.61914e-05	8.26249	0.000171008	6.55883	0.448683	1.25523	0.990256	-1.0036
Dnajc10	DnaJ (Hsp40) homolog, subfamily C, member 10	1.37318e-05	2.17858	2.24632e-05	2.07157	0.591421	1.04754	0.963478	-1.00393
Dnajc4	DnaJ (Hsp40) homolog, subfamily C, member 4	2.09245e-07	-2.07907	3.30124e-07	-1.99418	0.34008	-1.04682	0.930353	-1.00408
Zbtb4	zinc finger and BTB domain containing 4	0.0053568	-1.71861	0.00102491	-2.05156	0.26145	1.18875	0.977425	-1.00419
Trpv2	transient receptor potential cation channel, subfamily V, member 2	7.45907e-05	2.00292	3.74857e-05	2.14832	0.449693	-1.07721	0.964512	-1.00431
Jrk	jerky homolog (mouse)	0.000322913	-2.12227	0.00798586	-1.55247	0.0353012	-1.37317	0.972354	-1.00449
LOC688163	hypothetical protein LOC688163	1.33096e-06	-6.68109	2.846e-06	-5.58002	0.249632	-1.20273	0.976568	-1.00452
Magi3	membrane associated guanylate kinase, WW and PDZ domain containing 3	5.45949e-06	-2.05384	6.29967e-06	-2.02613	0.794147	-1.01848	0.946203	-1.00474
Dock1	dedicator of cyto-kinesis 1	1.85823e-06	-1.90839	7.68751e-07	-2.06485	0.202868	1.07606	0.919802	-1.00551
Arid1b	AT rich interactive domain 1B (Swi1 like)	1.05927e-06	-2.16715	2.56622e-06	-1.99147	0.163822	-1.09429	0.926913	-1.00558
Tmsb10	thymosin, beta 10	1.74688e-07	4.4638	1.78817e-07	4.44386	0.987324	-1.00148	0.94893	-1.00597
Homer3	Homer homolog 3 (Drosophila)	0.000654799	1.96932	0.000152059	2.3236	0.209613	-1.18717	0.962217	-1.00617
Zc3h8	zinc finger CCCH type containing 8	2.69926e-05	-2.02601	2.16301e-05	-2.07051	0.859056	1.01526	0.938445	-1.0066
Rassf6	Ras association (RalGDS/AF-6) domain family member 6	5.86323e-05	1.97035	2.25094e-05	2.16887	0.27763	-1.10838	0.939633	-1.00693
Cxcl12	chemokine (C-X-C motif) ligand 12 (stromal cell-derived factor 1)	5.37676e-05	-6.60386	3.44543e-05	-7.4484	0.652988	1.1201	0.977957	-1.00695
Diaph3	diaphanous homolog 3 (Drosophila)	0.00421825	1.58705	0.000243932	2.07726	0.0455978	-1.31829	0.952597	-1.00719
Rerg	RAS-like, estrogen-regulated, growth-inhibitor	0.000216731	-2.03231	0.000145274	-2.12064	0.761729	1.03557	0.947308	-1.00762
Vamp5	vesicle-associated membrane protein 5	2.78299e-07	11.0269	3.48085e-07	10.3002	0.70338	1.06244	0.96167	-1.00764
Arl4c	ADP-ribosylation factor-like 4C	1.88986e-06	5.41374	3.05858e-06	4.8812	0.509094	1.10039	0.955986	-1.00791
Tk2	thymidine kinase 2, mitochondrial	3.19386e-06	-2.37503	1.20881e-06	-2.67117	0.188964	1.11525	0.914382	-1.00846
Ctdspl	CTD (carboxy-terminal domain, RNA polymerase II, polypeptide A) small phosphatase-like	5.559e-05	-2.73274	7.21837e-05	-2.63556	0.739326	-1.04579	0.949052	-1.00861
Bbs4	Bardet-Biedl syndrome 4	5.06712e-05	-2.04531	0.000115654	-1.8904	0.363312	-1.09201	0.921705	-1.00931
Tmem106b	transmembrane protein 106B	2.72488e-06	-2.00516	1.28023e-05	-1.76151	0.048506	-1.14928	0.876689	-1.00963
Reep5	receptor accessory protein 5	5.36173e-06	-2.44665	9.10668e-06	-2.30166	0.424693	-1.07335	0.911088	-1.00975
Marcks	myristoylated alanine rich protein kinase C substrate	6.06568e-06	1.80902	9.87024e-07	2.12263	0.0171533	-1.18513	0.864522	-1.01004
Sfxn1	sideroflexin 1	2.21364e-06	2.03382	2.19537e-07	2.60663	0.00244253	-1.29496	0.866214	-1.01039
Pdgfra	platelet derived growth factor receptor, alpha polypeptide	0.00414642	-2.43681	0.0876344	-1.54798	0.072641	-1.59066	0.964185	-1.01046
LOC361346	similar to chromosome 18 open reading frame 54	1.94571e-06	4.32398	3.98686e-06	3.78938	0.34257	1.12924	0.933133	-1.01049
Ngef	neuronal guanine nucleotide exchange factor	2.29173e-05	-1.77754	4.62091e-06	-2.04104	0.0882064	1.13622	0.876875	-1.01058
Cyp2j10	cytochrome P450, family 2, subfamily j, polypeptide 10	5.38701e-05	2.81353	1.28632e-05	3.5221	0.113785	-1.26662	0.931938	-1.0118
Decr1	2,4-dienoyl CoA reductase 1, mitochondrial	0.000127764	-2.66046	0.000160779	-2.57682	0.76366	-1.04528	0.933058	-1.01241
Pdcd4	programmed cell death 4	2.63343e-07	-2.16055	7.83029e-06	-1.63937	0.000359773	-1.33476	0.80171	-1.01278
Syt17	synaptotagmin XVII	0.00126841	-2.5485	0.000530742	-2.92472	0.535418	1.13298	0.948517	-1.01293
Sh3rf1	SH3 domain containing ring finger 1	0.000497045	-3.50088	0.000163654	-4.38517	0.369875	1.23582	0.953258	-1.01357
Pnpla7	patatin-like phospholipase domain containing 7	1.57035e-06	-2.12529	1.51667e-06	-2.13261	0.869489	-1.01029	0.82641	-1.01376
Sel1l3	Sel-1 suppressor of lin-12-like 3 (C. elegans)	3.15865e-05	-2.63162	2.63583e-05	-2.69653	0.929761	1.01058	0.907669	-1.01394
Ubl7	Ubiquitin-like 7 (bone marrow stromal cell-derived)	2.98936e-05	-2.40729	2.99932e-05	-2.40632	0.887713	-1.01531	0.89066	-1.0149
Tpm3	Tropomyosin 3, gamma	1.26514e-08	3.24737	5.39604e-09	3.71323	0.0186803	-1.16103	0.771543	-1.01537
Smarca2	SWI/SNF related, matrix associated, actin dependent regulator of chromatin, subfamily a	8.88443e-07	-2.56798	1.65257e-07	-3.22739	0.0160891	1.23725	0.828669	-1.01579
Nrarp	Notch-regulated ankyrin repeat protein	6.37793e-07	2.59641	1.81973e-07	3.06951	0.0271354	-1.20106	0.821638	-1.01594
Giot1	gonadotropin inducible ovarian transcription factor 1	3.16144e-05	-2.80707	0.00020041	-2.2135	0.074085	-1.28838	0.901155	-1.01594
Vps37b	vacuolar protein sorting 37 homolog B (S. cerevisiae)	0.515299	1.10223	0.0498466	-1.39101	0.0205771	1.50913	0.91457	-1.01596
Cmah	cytidine monophosphate-N-acetylneuraminic acid hydroxylase	4.55919e-05	-2.53792	0.0108437	-1.47196	0.00137359	-1.75234	0.893356	-1.01634
FAM120C	Family with sequence similarity 120C	1.94396e-07	-4.02363	3.45518e-07	-3.64343	0.210417	-1.12269	0.851191	-1.0166
Myh14	myosin, heavy chain 14	1.24285e-07	-3.1708	8.26885e-08	-3.37262	0.516172	1.04622	0.8101	-1.01666
Fkbp1a	FK506 binding protein 1a	4.41742e-10	4.60503	1.07072e-09	3.92037	0.0103478	1.15451	0.698844	-1.01744
Fgfbp3	fibroblast growth factor binding protein 3	0.000160863	-1.96819	3.4398e-05	-2.32096	0.18672	1.1584	0.865396	-1.01798
Bcl11b	B-cell CLL/lymphoma 11B (zinc finger protein)	6.87644e-05	2.05138	0.00815629	1.39701	0.00505818	1.44195	0.854067	-1.01835
Shroom3	shroom family member 3	0.000103969	2.05912	0.0178314	1.35407	0.00436034	1.49306	0.861836	-1.0185
Cacna1d	calcium channel, voltage-dependent, L type, alpha 1D subunit	1.98929e-05	-2.47166	9.79725e-06	-2.70701	0.494727	1.07533	0.861195	-1.0185
Slc39a14	solute carrier family 39 (zinc transporter), member 14	5.70123e-07	5.04228	1.55188e-06	4.13848	0.153291	1.19602	0.874308	-1.0187
S100a1	S100 calcium binding protein A1	0.000375352	-2.01258	0.00330501	-1.63583	0.0937174	-1.25445	0.874567	-1.01962
PCNX	pecanex homolog (Drosophila)	1.54524e-06	-2.28834	2.29715e-05	-1.78183	0.0035179	-1.30979	0.773444	-1.01988
Phf7	PHD finger protein 7	1.80963e-06	-2.31349	1.05626e-06	-2.4592	0.570328	1.04129	0.770605	-1.02084
Armc6	armadillo repeat containing 6	9.46108e-06	2.24659	1.12508e-05	2.20512	0.979821	-1.00215	0.806677	-1.02099
Rbm43	RNA binding motif protein 43	0.000825648	-2.02286	0.000228231	-2.35505	0.363429	1.13956	0.878439	-1.02164
Lgals7	lectin, galactoside-binding, soluble, 7	0.0053194	3.18616	0.000357195	6.09747	0.059694	-1.95527	0.945761	-1.0217
Plekha8	pleckstrin homology domain containing, family A (phosphoinositide binding specific) mem	6.2891e-05	-2.21695	6.79493e-05	-2.19795	0.77995	-1.03072	0.841371	-1.02189
Bcl2l14	Bcl2-like 14 (apoptosis facilitator)	0.000477417	-2.06636	0.0238823	-1.42876	0.0159199	-1.47812	0.869357	-1.02203
Mboat1	membrane bound O-acyltransferase domain containing 1	9.57795e-09	3.35786	1.04724e-08	3.31246	0.874893	-1.00823	0.67672	-1.02204
Lrtomt	leucine rich transmembrane and 0-methyltransferase domain containing	1.46851e-06	-3.35799	4.07214e-05	-2.17281	0.00142926	-1.57956	0.825969	-1.02207
Mpnd	MPN domain containing	1.70739e-09	-2.02555	7.14017e-10	-2.1984	0.0355372	1.06146	0.373976	-1.02249
Rrbp1	ribosome binding protein 1	6.1815e-08	3.88587	9.93089e-08	3.58815	0.446394	1.05898	0.7623	-1.02265
Zfp187	zinc finger protein 187	5.57436e-07	-2.16412	3.96817e-07	-2.24044	0.827689	1.01222	0.687592	-1.02277
Ggh	gamma-glutamyl hydrolase (conjugase, folylpolygammaglutamyl hydrolase)	0.0014412	1.78904	0.000150924	2.27388	0.0644547	-1.29996	0.858602	-1.02278
Tmco6	transmembrane and coiled-coil domains 6	7.88964e-05	-2.13328	7.47006e-05	-2.14584	0.875331	-1.01681	0.83209	-1.0228
Rab13	RAB13, member RAS oncogene family	2.93512e-05	2.106	2.45699e-05	2.14509	0.653426	-1.04195	0.803207	-1.02296
Dnajc22	DnaJ (Hsp40) homolog, subfamily C, member 22	0.00017173	2.21655	8.5931e-05	2.40879	0.406154	-1.11177	0.855187	-1.02304
RGD1564114	similar to FLJ46082 protein	0.00109351	-2.08638	0.151026	-1.26484	0.0076314	-1.68827	0.879198	-1.02349
Sostdc1	sclerostin domain containing 1	7.77562e-05	-6.49512	9.41455e-05	-6.17801	0.779871	-1.07606	0.92921	-1.02352
Fhl3	four and a half LIM domains 3	2.59984e-06	4.1702	5.58174e-06	3.63544	0.378442	1.12052	0.852466	-1.02372
Xrcc6bp1	XRCC6 binding protein 1	3.47878e-05	-2.1617	1.70262e-05	-2.33989	0.569743	1.0569	0.804727	-1.02415
Rsbn1	round spermatid basic protein 1	1.09314e-06	-2.02833	2.51958e-06	-1.88517	0.108862	-1.10226	0.666086	-1.02447
Vezf1	Vascular endothelial zinc finger 1	9.53567e-07	-3.76412	4.51104e-07	-4.3082	0.297225	1.11717	0.813625	-1.02451
Xkr4	XK, Kell blood group complex subunit-related family, member 4	0.0101126	-2.05189	0.038055	-1.70343	0.355579	-1.23429	0.912385	-1.02468
Xpo4	exportin 4	2.21571e-06	2.74323	4.55885e-07	3.45457	0.0164932	-1.29084	0.777127	-1.02504
Lrp4	low density lipoprotein receptor-related protein 4	2.8148e-05	-4.13636	1.69757e-05	-4.57823	0.658209	1.07975	0.885786	-1.02508
Car12	Carbonic anyhydrase 12	1.02083e-11	316.135	1.24849e-11	273.911	0.276709	1.12551	0.810334	-1.02545
Hsf2	heat shock transcription factor 2	7.65943e-07	2.06092	1.23044e-06	1.9737	0.74967	1.01756	0.637065	-1.02617
Osbpl9	oxysterol binding protein-like 9	6.11247e-08	-2.8476	1.13545e-07	-2.6298	0.0920413	-1.11119	0.651352	-1.0262
Dync2h1	dynein cytoplasmic 2 heavy chain 1	1.13858e-06	-2.13726	1.15045e-06	-2.13507	0.653588	-1.02753	0.665709	-1.02648
LOC503192	Zinc finger protein ZFP	3.27419e-07	-2.73569	1.11015e-06	-2.36128	0.0297326	-1.18936	0.700107	-1.02658
Zfp329	zinc finger protein 329	5.30002e-06	-1.84324	6.75265e-07	-2.22812	0.0218393	1.1771	0.655728	-1.02694
Litaf	lipopolysaccharide-induced TNF factor	1.55094e-07	2.57044	3.60605e-07	2.33276	0.244803	1.07281	0.645699	-1.0271
ESRP1	epithelial splicing regulatory protein 1	3.55444e-07	-1.99427	1.99257e-07	-2.10355	0.576129	1.02689	0.572279	-1.02717
Actn1	actinin, alpha 1	1.42253e-09	33.1291	1.59887e-09	31.4771	0.837217	1.0246	0.820452	-1.02722
Leprotl1	leptin receptor overlapping transcript-like 1	4.93951e-05	4.22612	0.000360962	2.94964	0.107472	1.39403	0.884846	-1.02778
Frrs1	ferric-chelate reductase 1	6.41392e-05	2.90012	1.01763e-05	3.93773	0.0449769	-1.39567	0.849518	-1.0279
Lpar6	lysophosphatidic acid receptor 6	6.43406e-05	-2.39411	3.6203e-05	-2.57496	0.704783	1.04628	0.816787	-1.02797
Mrps15	mitochondrial ribosomal protein S15	8.22218e-06	2.09582	3.21515e-06	2.31232	0.125607	-1.13429	0.716741	-1.02809
Slc31a1	solute carrier family 31 (copper transporters), member 1	2.07604e-07	2.17539	8.85224e-08	2.37939	0.0396387	-1.12464	0.576928	-1.02821
Cep19	centrosomal protein 19	0.000520156	-2.70959	0.000329199	-2.91043	0.816161	1.04383	0.876654	-1.02902
Hint2	histidine triad nucleotide binding protein 2	3.41392e-09	-2.00545	4.03885e-09	-1.97636	0.127356	-1.04418	0.292725	-1.02904
Scx	scleraxis	0.000139094	-2.27049	0.000568586	-1.94456	0.166683	-1.20164	0.817912	-1.02915
LOC100360671	hypothetical protein LOC100360671	0.00073855	-2.02151	0.000184106	-2.38165	0.33974	1.14466	0.833861	-1.02926
Nfkbie	Nuclear factor of kappa light polypeptide gene enhancer in B-cells inhibitor, epsilon	1.08229e-05	2.87177	2.03787e-05	2.63347	0.610524	1.05946	0.797836	-1.02928
SORBS1	sorbin and SH3 domain containing 1	0.000322314	-1.89631	0.000176014	-2.01301	0.779952	1.03128	0.793042	-1.02934
Nr3c2	nuclear receptor subfamily 3, group C, member 2	0.00059778	-1.83411	0.405261	-1.10242	0.00127385	-1.71281	0.799917	-1.02951
Tmem97	transmembrane protein 97	0.000360984	2.65959	0.000317646	2.71042	0.779	-1.04928	0.86465	-1.0296
Slc25a36	solute carrier family 25, member 36	2.04544e-05	-1.67934	1.57321e-06	-2.07412	0.0144599	1.19904	0.625634	-1.03006
Fbxo16	F-box protein 16	0.000139954	-2.15768	0.0315527	-1.34292	0.00215236	-1.6551	0.800104	-1.03012
S100a6	S100 calcium binding protein A6	1.50838e-07	4.3572	8.10239e-07	3.27081	0.0183351	1.29287	0.739637	-1.03038
RGD1309540	similar to hypothetical protein MGC40841; similar to hypothetical protein MGC4707	0.0191459	-1.64407	0.00332787	-2.01558	0.336681	1.18972	0.864214	-1.03047
Mms22l	MMS22-like, DNA repair protein	0.00342294	1.79938	0.000978225	2.06328	0.27682	-1.18185	0.838096	-1.03068
RGD1565496	similar to Butyrate-induced transcript 1	1.94031e-05	2.23624	5.9968e-05	1.99112	0.368357	1.08957	0.74482	-1.03078
Ptprz1	protein tyrosine phosphatase, receptor-type, Z polypeptide 1	5.75986e-06	2.24204	1.00078e-05	2.1168	0.735951	1.02713	0.699227	-1.03119
LOC688459 /// LOC688548	hypothetical protein LOC688459 /// hypothetical protein LOC688548	0.000264809	3.79852	0.000130746	4.39038	0.439219	-1.19214	0.889589	-1.03143
Zfp709	zinc finger protein 709	0.000548273	-2.07277	0.0029649	-1.73976	0.155736	-1.22903	0.819179	-1.03158
Matn2	matrilin 2	8.2368e-06	-3.20597	1.55823e-06	-4.27086	0.0587563	1.2912	0.794632	-1.03172
Ankrd28	ankyrin repeat domain 28	8.22008e-07	-1.88486	3.52705e-07	-2.02824	0.396749	1.04261	0.517129	-1.03209
Prr12	proline rich 12	1.26422e-05	-2.11965	1.69241e-05	-2.0589	0.462527	-1.06307	0.69631	-1.0326
Gli4	GLI family zinc finger 4	8.52557e-06	-2.04506	5.67243e-06	-2.1285	0.915458	1.00787	0.665305	-1.03267
Rag1ap1	recombination activating gene 1 activating protein 1	0.00032786	-2.00967	0.0010799	-1.78688	0.234306	-1.16177	0.787828	-1.03297
Gmpr	guanosine monophosphate reductase	8.94836e-07	-2.46862	1.45386e-05	-1.86808	0.00167771	-1.36532	0.640097	-1.03318
Cml5	camello-like 5	5.10394e-07	-16.3211	2.08352e-06	-10.229	0.0321338	-1.64856	0.869789	-1.03322
Nefh	neurofilament, heavy polypeptide	0.000680332	2.97042	0.00244668	2.42058	0.422215	1.18757	0.875846	-1.03333
MAPK9	mitogen-activated protein kinase 9	1.76305e-06	-1.90807	9.9222e-07	-2.00656	0.748634	1.01756	0.547913	-1.03347
LOC690000	Similar to CG3740-PA	8.30706e-07	-4.45182	1.10211e-06	-4.21821	0.452247	-1.09077	0.771902	-1.03353
Nfkb1	nuclear factor of kappa light polypeptide gene enhancer in B-cells 1	5.55303e-08	2.0878	1.26374e-07	1.94008	0.33376	1.04017	0.400427	-1.03458
Gkn1	gastrokine 1	1.77327e-06	-3.79131	5.88128e-05	-2.2965	0.00113282	-1.708	0.761669	-1.03458
Ly6e	lymphocyte antigen 6 complex, locus E	0.00403807	-2.60295	0.0113749	-2.19219	0.41637	-1.22848	0.890788	-1.03462
Slc24a3	solute carrier family 24 (sodium/potassium/calcium exchanger), member 3	3.0629e-07	11.0083	2.28475e-07	12.071	0.436964	-1.13543	0.827962	-1.03547
Pkia	Protein kinase (cAMP-dependent, catalytic) inhibitor alpha	0.0157151	1.6311	0.00168522	2.09979	0.109782	-1.3339	0.830052	-1.03616
Dlx5	distal-less homeobox 5	4.51095e-06	-2.7535	4.90748e-07	-3.87158	0.0112204	1.3569	0.712298	-1.03622
Sh3tc1	SH3 domain and tetratricopeptide repeats 1	1.68752e-06	-9.52389	6.75017e-06	-6.53247	0.0530848	-1.51097	0.849249	-1.03638
MYO1B	myosin IB	1.49497e-06	-2.28592	1.11796e-06	-2.36012	0.953966	-1.00392	0.600203	-1.03651
RGD1305899	similar to Protein C20orf158	3.72454e-05	2.38218	8.2949e-05	2.17281	0.612	1.05761	0.743334	-1.03664
Homer1	homer homolog 1 (Drosophila)	0.000427267	2.26684	6.77744e-05	2.91569	0.0775147	-1.33372	0.805276	-1.03691
Klf13	Kruppel-like factor 13	4.16498e-07	2.78289	8.91419e-07	2.52805	0.413209	1.06129	0.610221	-1.03723
Entpd2	ectonucleoside triphosphate diphosphohydrolase 2	1.95706e-05	2.39424	4.23986e-05	2.19253	0.614359	1.05256	0.716428	-1.03747
Slc7a6	solute carrier family 7 (cationic amino acid transporter, y+ system), member 6	4.85392e-07	4.7864	8.11104e-07	4.32769	0.570934	1.0656	0.738321	-1.0379
Dbp	D site of albumin promoter (albumin D-box) binding protein	9.36076e-06	-7.40163	1.92654e-05	-6.14533	0.302886	-1.25021	0.858639	-1.03801
Ddx26b	DEAD/H (Asp-Glu-Ala-Asp/His) box polypeptide 26B	0.00073443	-2.60243	0.000349575	-2.92003	0.679095	1.08064	0.840392	-1.03831
Echdc3	enoyl Coenzyme A hydratase domain containing 3	7.59558e-06	-2.7283	2.97559e-05	-2.3029	0.0689468	-1.23079	0.709763	-1.03888
Cxcl3	chemokine (C-X-C motif) ligand 3	2.952e-05	15.4894	3.25435e-05	14.9337	0.994985	-1.00211	0.908138	-1.0394
Zfp275	zinc finger protein 275	1.49176e-05	2.76593	1.75808e-07	6.17981	5.86667e-05	-2.32256	0.73313	-1.03952
Gabrp	gamma-aminobutyric acid (GABA-A) receptor, pi	4.32691e-08	114.156	5.56468e-08	98.3153	0.655758	1.11683	0.874613	-1.03966
Wwc1	WW and C2 domain containing 1	9.10105e-06	-2.25835	4.90293e-05	-1.9104	0.0364402	-1.22911	0.648227	-1.03974
Uchl3	ubiquitin carboxyl-terminal esterase L3 (ubiquitin thiolesterase)	1.35454e-06	2.08374	2.94198e-06	1.94094	0.596827	1.03224	0.514827	-1.04004
Lsamp	limbic system-associated membrane protein	4.78918e-05	-4.78099	6.98789e-05	-4.41059	0.561601	-1.12746	0.84761	-1.04011
Swap70	SWAP switching B-cell complex 70	0.00524292	1.91478	0.000240641	2.92108	0.026991	-1.58725	0.822446	-1.04045
Ky	kyphoscoliosis peptidase	0.00223476	-1.89473	0.127951	-1.27846	0.0172433	-1.54201	0.790911	-1.04046
Hpgd	hydroxyprostaglandin dehydrogenase 15 (NAD)	0.00916756	2.16266	0.00785362	2.2147	0.784031	-1.06613	0.862987	-1.04108
Hmga2	high mobility group AT-hook 2	0.00047912	2.15582	0.00231558	1.81577	0.362482	1.14019	0.773431	-1.04129
Arl6ip5	ADP-ribosylation-like factor 6 interacting protein 5	2.51539e-06	-2.00758	5.56237e-06	-1.87294	0.100689	-1.1163	0.512922	-1.04144
Txndc17	Thioredoxin domain containing 17	0.000144424	-1.9023	6.95867e-05	-2.04136	0.761244	1.03039	0.680895	-1.04146
Pfkfb1	6-phosphofructo-2-kinase/fructose-2,6-biphosphatase 1	0.000119455	2.08145	0.000779853	1.73981	0.226028	1.14857	0.70952	-1.04161
Zfp385b	zinc finger protein 385B	8.24555e-06	-3.40116	0.000224503	-2.16477	0.00372234	-1.63713	0.744521	-1.042
Plekhn1	pleckstrin homology domain containing, family N member 1	1.41777e-06	-2.00729	1.14533e-06	-2.04716	0.704695	-1.02184	0.474514	-1.04214
Plcd3	phospholipase C, delta 3	0.000213932	2.50408	0.00209811	1.90118	0.142784	1.26347	0.779971	-1.04246
Gcnt2	glucosaminyl (N-acetyl) transferase 2, I-branching enzyme	3.18047e-05	13.6637	2.46135e-05	15.0056	0.676352	-1.1451	0.896951	-1.04271
LOC312502	similar to RAB11 family interacting protein 5 (class I) isoform 1	1.62586e-05	3.23753	2.79446e-05	2.9776	0.754874	1.04231	0.750224	-1.04316
Letm1	leucine zipper-EF-hand containing transmembrane protein 1	2.33403e-05	1.91933	9.71208e-06	2.08379	0.134461	-1.13256	0.587354	-1.04317
LOC100359980	smooth muscle and non-muscle myosin alkali light chain 6B-like	4.82111e-06	-2.24725	9.36103e-07	-2.72933	0.0790594	1.16307	0.580144	-1.04424
Arhgap1	Rho GTPase activating protein 1	0.00830321	-1.54225	0.00031828	-2.11376	0.0604221	1.31242	0.736596	-1.0443
Cst6	cystatin E/M	1.74181e-08	-3.08308	1.27496e-08	-3.22633	0.968515	1.00206	0.415883	-1.04431
HSDL1	hydroxysteroid dehydrogenase like 1	0.0108531	-1.63215	0.00135404	-2.03934	0.261534	1.1964	0.777357	-1.04437
Hck	hemopoietic cell kinase	0.00282192	2.28557	0.00107793	2.63843	0.364143	-1.20611	0.827586	-1.04481
Oaf	OAF homolog (Drosophila)	2.26432e-06	3.46576	2.67571e-06	3.37351	0.87436	-1.01718	0.684231	-1.04499
Apobec3f	apolipoprotein B mRNA editing enzyme, catalytic polypeptide-like 3F	2.52395e-06	2.38392	1.76997e-06	2.4847	0.281421	-1.08918	0.568144	-1.04501
Ampd2	adenosine monophosphate deaminase 2 (isoform L)	2.69376e-06	2.05459	1.55371e-05	1.76823	0.124913	1.11179	0.495782	-1.04511
Cirbp	cold inducible RNA binding protein	3.6562e-09	-4.01248	3.10571e-09	-4.13016	0.771252	-1.01552	0.411948	-1.0453
Msl2l1	Male-specific lethal 2-like 1 (Drosophila)	0.00115161	-2.0257	0.000376489	-2.31636	0.549712	1.09357	0.763266	-1.04565
Pdia6	protein disulfide isomerase family A, member 6	9.07336e-08	2.12303	1.35335e-07	2.04483	0.861371	-1.00755	0.311365	-1.04608
Mlec	malectin	9.65885e-07	3.35471	3.43483e-07	3.98956	0.0429482	-1.24413	0.632914	-1.04616
Cxcl3	chemokine (C-X-C motif) ligand 3	4.46346e-06	27.3117	5.83781e-06	24.3244	0.822414	1.07295	0.884769	-1.04647
Arhgap24	Rho GTPase activating protein 24	0.00140947	-2.10222	0.00124387	-2.13456	0.851291	-1.03062	0.777988	-1.04648
Znf467	zinc finger protein 467	1.47755e-05	-2.51321	8.38196e-06	-2.70376	0.792674	1.02735	0.654865	-1.04717
2012-09-11	Septin 11	0.00484505	-1.70336	0.143873	1.25088	0.000400372	-2.23184	0.745777	-1.04747
Ccr1	chemokine (C-C motif) receptor 1	9.71526e-05	2.82821	0.000124394	2.72791	0.943098	-1.01077	0.755749	-1.04793
Znf763	zinc finger protein 763	0.000144478	-2.82636	8.81123e-05	-3.05019	0.854039	1.02966	0.767831	-1.04811
Zfp157	zinc finger protein 157	0.000371692	-2.71893	0.000548642	-2.56692	0.555796	-1.11032	0.788956	-1.04824
Synpr	synaptoporin	0.000496283	-2.24587	0.000487789	-2.25067	0.762186	-1.04608	0.751338	-1.04832
Vegfa	vascular endothelial growth factor A	0.000137163	5.89158	0.000913628	3.79218	0.16989	1.48161	0.860059	-1.0486
Adfp	Adipose differentiation related protein	2.18707e-05	2.09518	4.29988e-05	1.96191	0.836037	1.01814	0.58558	-1.04891
Ivns1abp	influenza virus NS1A binding protein	1.13739e-07	-3.31328	8.70251e-08	-3.45437	0.931279	-1.00609	0.503924	-1.04894
Smoc2	SPARC related modular calcium binding 2	7.41269e-08	48.261	8.27133e-08	45.7304	0.978622	1.0058	0.824001	-1.04925
CACNA1D	calcium channel, voltage-dependent, L type, alpha 1D subunit	7.49434e-06	-3.04998	2.58057e-06	-3.61245	0.305063	1.12769	0.666406	-1.0503
CACNA1D	calcium channel, voltage-dependent, L type, alpha 1D subunit	7.49434e-06	-3.04998	2.58057e-06	-3.61245	0.305063	1.12769	0.666406	-1.0503
Pcdha1 /// Pcdha10 /// Pcdha11 /// Pcdha12 /// Pcdha13 /// Pcdha2 /// Pcdha3 /// Pcdha4 /// Pcdha5 /// Pcdha6 /// Pcdha7 /// Pcdha8 /// Pcdha9 /// Pcdhac1 /// Pcdhac2	protocadherin alpha 1 /// protocadherin alpha 10 /// protocadherin alpha 11 /// protoca	0.00209266	-2.2121	0.000133848	-3.3663	0.0704676	1.44885	0.789351	-1.05033
Bri3bp	Bri3 binding protein	5.76535e-06	2.454	5.84083e-06	2.45019	0.588037	-1.04928	0.576287	-1.05091
Sbsn	suprabasin	2.56889e-05	4.96189	0.000197207	3.32434	0.0962131	1.42009	0.795788	-1.05106
Ada	adenosine deaminase	1.04793e-07	2.57348	3.44131e-07	2.25123	0.156043	1.08706	0.373051	-1.05159
Ppp1r3c	protein phosphatase 1, regulatory (inhibitor) subunit 3C	3.20981e-06	-11.6658	3.64073e-06	-11.2026	0.684309	-1.09532	0.820821	-1.05183
Nlk	nemo like kinase	3.70599e-07	-2.41596	1.23208e-07	-2.76246	0.191896	1.08697	0.412102	-1.05193
Epb4.1l2	erythrocyte membrane protein band 4.1-like 2	1.4318e-06	4.77405	4.83309e-07	6.04965	0.0482948	-1.33333	0.691344	-1.05219
Cd47	Cd47 molecule	3.13204e-05	2.91714	6.08152e-05	2.65465	0.744142	1.04413	0.69974	-1.05243
KLHL12	kelch-like 12 (Drosophila)	5.46194e-06	-2.04309	1.1221e-05	-1.91337	0.121176	-1.12389	0.469041	-1.05253
KLHL12	kelch-like 12 (Drosophila)	5.46194e-06	-2.04309	1.1221e-05	-1.91337	0.121176	-1.12389	0.469041	-1.05253
Mir23b	microRNA mir-23b	0.0390085	-1.64196	0.00373837	-2.25379	0.223619	1.30392	0.80497	-1.05269
Zbtb48	zinc finger and BTB domain containing 48	1.09663e-05	-2.38766	6.02935e-06	-2.56732	0.820158	1.02139	0.584019	-1.05273
Eif4e2	eukaryotic translation initiation factor 4E family member 2	4.32918e-07	2.09675	6.04363e-07	2.03222	0.698003	-1.02036	0.334859	-1.05276
Tgfb1	transforming growth factor, beta 1	8.99013e-05	2.21382	3.33828e-05	2.49137	0.161291	-1.18494	0.651495	-1.05293
Pftk1	PFTAIRE protein kinase 1	8.03515e-07	9.44027	9.10184e-07	9.10593	0.926598	-1.01577	0.761449	-1.05307
Fkbp5	FK506 binding protein 5	4.24678e-07	-9.03385	1.03979e-07	-13.9706	0.032322	1.46846	0.736541	-1.05313
Ltbp4	latent transforming growth factor beta binding protein 4	8.91233e-06	-2.41516	4.03334e-06	-2.66434	0.618071	1.0471	0.57294	-1.05355
Hmgn3	high mobility group nucleosomal binding domain 3	8.16714e-06	-1.83986	2.25669e-06	-2.06055	0.345921	1.06263	0.411581	-1.05395
Vangl1	vang-like 1 (van gogh, Drosophila)	2.5476e-07	2.4075	9.53305e-08	2.70893	0.0153127	-1.18598	0.371247	-1.05401
RGD1565033	similar to hypothetical protein LOC284018 isoform b	7.41258e-06	-2.66792	5.14543e-06	-2.80164	0.969857	-1.00376	0.599647	-1.05407
Gngt2	guanine nucleotide binding protein (G protein), gamma transducing activity polypeptide	0.000669752	2.0953	0.00366811	1.74774	0.378699	1.13696	0.710377	-1.05444
RGD1561963	similar to Dedicator of cytokinesis protein 10 (Protein zizimin 3)	5.22685e-05	2.02181	0.000320691	1.71955	0.262047	1.11502	0.572726	-1.05449
Crlf1	cytokine receptor-like factor 1	9.97549e-08	-7.47923	4.57357e-08	-9.23112	0.200998	1.17016	0.649058	-1.05476
Acsl4	acyl-CoA synthetase long-chain family member 4	1.95174e-05	2.06493	1.07709e-05	2.19424	0.197054	-1.12094	0.528765	-1.05487
Ccdc3	coiled-coil domain containing 3	1.71953e-05	3.16178	0.000214457	2.24189	0.0512626	1.33635	0.681675	-1.05535
Homer1	homer homolog 1 (Drosophila)	0.00137796	2.10005	0.00213715	1.99336	0.988902	-1.00223	0.734823	-1.05587
Nol3	nucleolar protein 3 (apoptosis repressor with CARD domain)	4.01716e-05	2.01281	3.92719e-05	2.01724	0.528392	-1.05862	0.544041	-1.05629
Tspan13	tetraspanin 13	1.66776e-07	9.03709	2.23771e-07	8.32972	0.844953	1.02698	0.687969	-1.05642
Fam117b	family with sequence similarity 117, member B	4.66382e-07	-3.29906	1.72937e-07	-3.8814	0.223563	1.11361	0.519456	-1.05649
Ino80c	INO80 complex subunit C	7.30931e-07	-2.20697	1.02211e-06	-2.13374	0.15977	-1.09292	0.36456	-1.05666
LOC360919	similar to alpha-fetoprotein	1.68139e-06	3.00648	1.73178e-06	2.99374	0.581369	-1.05238	0.551026	-1.05686
LOC503192	zinc finger protein ZFP	6.50751e-06	-2.1672	8.70129e-06	-2.10429	0.287675	-1.08874	0.47797	-1.05713
Aldh7a1	aldehyde dehydrogenase 7 family, member A1	3.99672e-07	2.20813	1.66052e-06	1.93166	0.179435	1.08119	0.324484	-1.05728
Arhgap22	Rho GTPase activating protein 22	3.62182e-05	-2.47954	8.15234e-05	-2.24946	0.202158	-1.16611	0.624532	-1.05791
RGD1309492	similar to mKIAA1737 protein	7.06898e-05	-2.30968	6.45862e-05	-2.33454	0.693501	-1.04681	0.627642	-1.05807
Slc2a9	solute carrier family 2 (facilitated glucose transporter), member 9	4.12995e-06	-1.95791	2.32429e-06	-2.06428	0.952321	-1.00377	0.380353	-1.05831
Pllp	plasma membrane proteolipid (plasmolipin)	3.02437e-06	-3.96483	4.13717e-06	-3.74948	0.375757	-1.11923	0.648925	-1.05844
Tchh	Trichohyalin	2.10457e-07	8.6532	1.23706e-07	10.0749	0.154659	-1.23266	0.679418	-1.05872
Tpm3	tropomyosin 3, gamma	1.95181e-08	3.06694	9.06754e-09	3.43835	0.00980047	-1.18759	0.291612	-1.05931
Zadh2	zinc binding alcohol dehydrogenase, domain containing 2	0.000150495	-2.59847	8.31596e-05	-2.82788	0.854902	1.02723	0.695385	-1.05944
LOC100361122	SRY-box containing gene 9	0.00174565	2.19777	0.00638211	1.87068	0.562529	1.10884	0.743959	-1.05954
LOC690492	similar to CD33 antigen	0.000317699	2.42159	0.000308301	2.43123	0.68454	-1.06391	0.703599	-1.05969
Ecop	EGFR-coamplified and overexpressed protein	0.00939364	2.31805	0.0094011	2.31774	0.820775	-1.05964	0.820372	-1.05978
Pcdhga1 /// Pcdhga10 /// Pcdhga11 /// Pcdhga12 /// Pcdhga2 /// Pcdhga3 /// Pcdhga5 /// Pcdhga7 /// Pcdhga8 /// Pcdhga9 /// Pcdhgb7 /// Pcdhgb8 /// Pcdhgc3	protocadherin gamma subfamily A, 1 /// protocadherin gamma subfamily A, 10 /// protocad	8.95821e-06	2.01808	2.31083e-05	1.85455	0.71865	1.02675	0.435089	-1.05983
Lmna	lamin A	7.97501e-09	3.43365	1.30386e-08	3.18737	0.756573	1.01622	0.278303	-1.06007
Rpesp	RPE-spondin	4.25215e-06	-5.36413	0.000470921	-2.38334	0.000467015	-2.38597	0.713084	-1.06012
Gipc2	GIPC PDZ domain containing family, member 2 /// GIPC PDZ domain containing family, memb	0.000130647	2.36304	7.53468e-05	2.53481	0.334941	-1.1374	0.653091	-1.06033
Coq10a	coenzyme Q10 homolog A (S. cerevisiae)	2.27351e-06	-1.91923	8.37006e-07	-2.10176	0.587338	1.03144	0.305756	-1.06173
Mal	mal, T-cell differentiation protein	7.45878e-09	-1.99172	3.52541e-09	-2.13276	0.768819	1.00848	0.0628845	-1.0618
Sorl1	sortilin-related receptor, LDLR class A repeats-containing	2.35477e-08	-4.30283	1.33726e-08	-4.79625	0.496499	1.04967	0.403035	-1.06193
RGD1310686	similar to chromosome 16 open reading frame 5	4.29363e-07	-2.0998	1.62385e-07	-2.31793	0.464203	1.0393	0.2637	-1.06214
Surf4	surfeit 4	1.42602e-05	2.0259	2.43288e-05	1.92808	0.885695	-1.0113	0.445668	-1.06261
Ifitm1	interferon induced transmembrane protein 1	0.000216812	-11.1902	0.00013182	-13.4126	0.760392	1.12718	0.875353	-1.06337
Lama3	laminin, alpha 3	9.35253e-06	8.13801	1.35067e-05	7.35457	0.856314	1.04052	0.779505	-1.06344
Fam107b	family with sequence similarity 107, member B	7.87797e-05	-1.98007	4.14012e-05	-2.11177	0.976771	1.00279	0.525249	-1.06354
LOC687192	hypothetical protein LOC687192	1.07492e-06	-2.76153	8.11516e-07	-2.86794	0.7662	-1.02408	0.448731	-1.06354
Usp46	ubiquitin specific peptidase 46	0.000142988	-2.1764	0.00031329	-1.99993	0.238957	-1.15754	0.605905	-1.06368
RGD1310964	similar to RIKEN cDNA 9430031J16	0.228712	-1.25424	0.000818772	-2.47046	0.00757224	1.85152	0.731061	-1.06382
Sardh	sarcosine dehydrogenase	0.415138	-1.34203	0.449814	1.31256	0.103883	-1.87397	0.86101	-1.06385
C7orf42	chromosome 7 open reading frame 42	0.0216793	-2.36413	0.00978493	-2.772	0.756155	1.10212	0.842923	-1.06389
C7orf42	chromosome 7 open reading frame 42	0.0216793	-2.36413	0.00978493	-2.772	0.756155	1.10212	0.842923	-1.06389
Dzip1l	DAZ interacting protein 1-like	1.83222e-05	2.55526	6.4706e-05	2.19926	0.421898	1.09209	0.568238	-1.06389
Gpt	glutamic-pyruvate transaminase (alanine aminotransferase)	2.2064e-09	-4.22962	7.46684e-10	-5.22237	0.0174555	1.16047	0.248703	-1.06398
Gpc3	glypican 3	0.000669517	-2.24358	0.000335319	-2.45463	0.860039	1.02778	0.688793	-1.0645
LOC689147	Hypothetical protein LOC689147	0.000190407	-3.23464	0.00584834	-1.96115	0.0143437	-1.75685	0.736128	-1.06517
Actn1	actinin, alpha 1	2.98293e-13	70.6093	3.9206e-13	61.1928	0.135943	1.08308	0.224788	-1.06538
Pla2g4a	phospholipase A2, group IVA (cytosolic, calcium-dependent)	2.01779e-05	-2.89884	6.46504e-05	-2.47449	0.10098	-1.24821	0.610374	-1.06548
LOC678772	similar to O-acetyltransferase	1.04969e-05	-2.70232	1.60379e-05	-2.55694	0.279057	-1.12611	0.552176	-1.06553
Agpat2	1-acylglycerol-3-phosphate O-acyltransferase 2 (lysophosphatidic acid acyltransferase,	4.30804e-07	4.58407	4.06896e-07	4.63599	0.48789	-1.07775	0.553919	-1.06568
Cdc27	cell division cycle 27 homolog (S. cerevisiae)	0.000103333	1.69249	5.41857e-06	2.19973	0.00231179	-1.38555	0.414053	-1.06605
Ppp1r26	protein phosphatase 1, regulatory subunit 26	2.25375e-05	-2.57516	1.14978e-05	-2.81882	0.813444	1.02668	0.569158	-1.06618
Runx1	runt-related transcription factor 1	1.89878e-05	2.86133	7.88061e-05	2.37059	0.321555	1.13182	0.598129	-1.06643
Bcl2l14	Bcl2-like 14 (apoptosis facilitator)	1.91853e-05	-2.62121	0.000574955	-1.80667	0.00363375	-1.54768	0.564769	-1.06674
Fcer1g	Fc fragment of IgE, high affinity I, receptor for; gamma polypeptide	2.54223e-05	10.3594	2.56899e-05	10.3247	0.826811	-1.06324	0.817535	-1.06681
Tm9sf3	transmembrane 9 superfamily member 3	8.85655e-06	-1.87694	3.20879e-06	-2.0557	0.692892	1.02627	0.334406	-1.0672
Il6ra	interleukin 6 receptor, alpha	1.35033e-05	-2.70711	5.03935e-05	-2.29631	0.0620635	-1.2583	0.555674	-1.06736
Agps	alkylglycerone phosphate synthase	4.52148e-06	2.58041	1.53515e-05	2.23622	0.398297	1.08088	0.474638	-1.06757
Zmym2	zinc finger, MYM-type 2	6.19639e-06	-1.89684	6.66811e-07	-2.35781	0.0386907	1.16374	0.314264	-1.06813
Csf3r	colony stimulating factor 3 receptor (granulocyte)	3.29361e-06	5.32715	5.14482e-06	4.83994	0.84406	1.03042	0.666697	-1.06816
LOC681740	similar to jumonji protein	0.000218743	-1.95447	5.95583e-05	-2.2422	0.518345	1.0738	0.547853	-1.06837
Sod2	superoxide dismutase 2, mitochondrial	1.324e-07	-2.91603	9.44331e-07	-2.29497	0.00116968	-1.35767	0.317771	-1.06851
Rbp2	retinol binding protein 2, cellular	1.92985e-06	3.28797	6.87385e-07	3.90263	0.041129	-1.26851	0.516102	-1.06872
Fcgr2a	Fc fragment of IgG, low affinity IIa, receptor (CD32) /// Fc fragment of IgG, low affin	0.00200115	5.89877	0.00255317	5.48933	0.98927	1.00549	0.870336	-1.06873
Ywhag	tyrosine 3-monooxygenase/tryptophan 5-monooxygenase activation protein, gamma polypepti	7.49541e-06	2.23131	9.62521e-06	2.17308	0.624596	-1.04098	0.423288	-1.06887
Krt14	keratin 14	2.52571e-07	2.40767	4.79797e-07	2.24547	0.959911	1.00288	0.262502	-1.06916
C1QTNF1	C1q and tumor necrosis factor related protein 1	2.32915e-05	-1.83952	3.85485e-06	-2.17287	0.191654	1.10478	0.366296	-1.0692
Slc14a1	solute carrier family 14 (urea transporter), member 1	0.000959848	-6.20384	0.000995824	-6.13802	0.834202	-1.08089	0.856621	-1.06942
Clip4	CAP-GLY domain containing linker protein family, member 4	0.110206	-1.31529	0.000571428	-2.31573	0.0114153	1.64611	0.671034	-1.06957
Asgr1	asialoglycoprotein receptor 1	3.61978e-05	-2.28467	0.000742058	-1.70195	0.00701849	-1.43606	0.52152	-1.06978
Dci	dodecenoyl-Coenzyme A delta isomerase (3,2 trans-enoyl-Coenzyme A isomerase)	6.10531e-05	-2.83045	3.49608e-05	-3.07827	0.907422	1.01649	0.633348	-1.06991
Nudt6	nudix (nucleoside diphosphate linked moiety X)-type motif 6	8.48415e-08	-3.24229	4.76372e-08	-3.54706	0.742712	1.02219	0.323843	-1.07025
Cxxc5	CXXC finger 5	1.31141e-06	-2.21035	7.44275e-07	-2.34857	0.907234	-1.00748	0.303781	-1.07048
Klf3	Kruppel-like factor 3 (basic)	3.66673e-05	-1.86716	1.20096e-05	-2.06915	0.661896	1.03519	0.397264	-1.07051
Rab15	RAB15, member RAS oncogene family	0.00139132	-1.95106	0.000432005	-2.23271	0.6464	1.06892	0.638858	-1.07058
Ypel3	yippee-like 3 (Drosophila)	0.000167926	-2.01516	5.88292e-05	-2.25629	0.683648	1.04584	0.538089	-1.07058
Icos	Inducible T-cell co-stimulator	1.48049e-05	2.42419	2.63214e-05	2.26763	0.987005	-1.0016	0.494168	-1.07075
Ap1s2	adaptor-related protein complex 1, sigma 2 subunit	0.00015412	2.61175	0.00084431	2.10223	0.330543	1.16024	0.646345	-1.07078
Asf1a	ASF1 anti-silencing function 1 homolog A (S. cerevisiae)	6.66866e-06	-3.03765	1.57419e-05	-2.69105	0.115762	-1.20896	0.541468	-1.07102
Cdc42ep5	CDC42 effector protein (Rho GTPase binding) 5	1.18506e-05	1.93232	3.10745e-06	2.19749	0.021007	-1.21816	0.347576	-1.07116
Znf23	zinc finger protein 23 (KOX 16)	6.24899e-07	-2.4148	4.37808e-07	-2.51715	0.67477	-1.02762	0.303765	-1.07117
Cyp2b1	cytochrome P450, family 2, subfamily b, polypeptide 1 /// cytochrome P450, family 2, su	6.6433e-05	-2.96382	0.000478249	-2.25802	0.0451465	-1.40707	0.642211	-1.07199
Glb1l2	galactosidase, beta 1-like 2	0.00137422	-2.02268	0.000164132	-2.65169	0.208645	1.22279	0.648529	-1.07212
Fam158a	family with sequence similarity 158, member A	7.93344e-07	-3.59357	8.18052e-07	-3.57535	0.447382	-1.07767	0.477772	-1.07221
Hbs1l	Hbs1-like (S. cerevisiae)	7.39459e-08	2.11025	1.29829e-07	2.00364	0.657813	-1.0187	0.118831	-1.0729
Mov10	Moloney leukemia virus 10	1.70811e-06	2.03986	2.69809e-06	1.95692	0.626469	-1.02961	0.255096	-1.07325
Znf593	zinc finger protein 593	3.30705e-05	2.14699	1.53685e-06	3.16445	0.00106407	-1.58207	0.463096	-1.07339
Eraf	erythroid associated factor	0.00245505	-1.94384	0.00042623	-2.411	0.372728	1.1553	0.654698	-1.0736
Ankrd44	ankyrin repeat domain 44	2.24738e-06	-1.79434	5.05759e-07	-2.03391	0.302174	1.05555	0.184117	-1.07386
Cxcl16	chemokine (C-X-C motif) ligand 16	3.96029e-06	3.22134	3.43432e-06	3.29379	0.401835	-1.09808	0.518801	-1.07393
Mpzl1	myelin protein zero-like 1	8.2117e-08	6.06253	9.61331e-08	5.84866	0.727224	-1.03624	0.488634	-1.07413
Klhl23	kelch-like 23 (Drosophila)	0.000199897	-2.81611	0.000293097	-2.66047	0.447287	-1.13704	0.667867	-1.0742
LOC100909928	uncharacterized LOC100909928	0.0125331	2.69195	0.0318135	2.23069	0.716736	1.1232	0.822192	-1.07441
Gbp2	guanylate binding protein 2	2.24151e-05	5.91648	1.35486e-06	13.2391	0.00251855	-2.40457	0.731846	-1.07459
ALCAM	activated leukocyte cell adhesion molecule	0.000468117	2.62247	0.000688922	2.48035	0.925228	-1.01659	0.682191	-1.07484
Tfrc	transferrin receptor	5.50562e-05	3.25937	4.20138e-05	3.41057	0.462379	-1.12495	0.647754	-1.07508
Plekhh1	pleckstrin homology domain containing, family H (with MyTH4 domain) member 1	3.38454e-06	-5.91717	9.30846e-06	-4.73022	0.0954308	-1.34629	0.652993	-1.07623
Frmpd1	FERM and PDZ domain containing 1	2.4115e-07	-3.19978	1.07052e-06	-2.6096	0.00517825	-1.32044	0.339891	-1.07689
Sdf2l1	stromal cell-derived factor 2-like 1	8.18404e-05	2.2647	3.52202e-05	2.50849	0.152546	-1.19293	0.524935	-1.07699
Ctsh	cathepsin H	1.24848e-05	2.59874	7.6429e-05	2.10437	0.211169	1.1465	0.481238	-1.07713
Casp1	caspase 1	0.00664908	-1.84763	0.133005	-1.32648	0.0430508	-1.50048	0.671271	-1.07725
Ahcyl2	adenosylhomocysteinase-like 2	5.99091e-07	2.98163	9.15739e-07	2.81218	0.840284	-1.01618	0.361862	-1.07741
Sfxn3	sideroflexin 3	0.000158416	-1.93954	1.78061e-05	-2.45831	0.14116	1.17621	0.473741	-1.07759
LOC306766	hypothetical LOC306766	8.96201e-06	-1.99925	2.8939e-06	-2.23673	0.606417	1.03813	0.314877	-1.0777
Capn13	calpain 13	0.945639	1.01098	0.0313357	1.49856	0.0166073	-1.59762	0.642247	-1.07781
Serpinb6a	serine (or cysteine) peptidase inhibitor, clade B, member 6a	5.30073e-07	6.13217	7.56331e-07	5.65159	0.963337	1.00599	0.564887	-1.07857
Emilin2	elastin microfibril interfacer 2	0.00138996	2.20477	0.00405756	1.93163	0.741423	1.05813	0.659116	-1.0787
Rbpms2	RNA binding protein with multiple splicing 2	0.0125499	2.3876	0.0342907	1.99811	0.716779	1.10752	0.786876	-1.07892
RGD1304587	similar to RIKEN cDNA 2310033P09	3.11279e-06	-2.55053	1.06166e-05	-2.21496	0.0291584	-1.24276	0.379225	-1.07925
Plekhn1	pleckstrin homology domain containing, family N member 1	3.49773e-07	-2.36325	9.80918e-08	-2.75232	0.215933	1.07905	0.214625	-1.07931
Cugbp1	CUG triplet repeat, RNA binding protein 1	5.54135e-06	3.70827	3.61501e-06	4.00245	0.252436	-1.16498	0.554533	-1.07935
Acaa2	Acetyl-Coenzyme A acyltransferase 2	0.0110733	-2.10975	0.456931	-1.19427	0.0217647	-1.90672	0.745395	-1.07935
Dos	downstream of Stk11	1.38222e-05	-2.13402	2.08873e-06	-2.65013	0.121521	1.15049	0.372735	-1.07941
Zyx	zyxin	0.000146799	2.73943	7.73437e-05	3.01732	0.280306	-1.18907	0.622575	-1.07956
C1ql3	Complement component 1, q subcomponent-like 3	0.000169587	-2.27722	0.00490391	-1.61553	0.00973347	-1.52307	0.551921	-1.08051
Rhov	ras homolog gene family, member V	0.000212257	2.255	0.00032629	2.14463	0.835354	-1.02772	0.559531	-1.08061
Zfp423	zinc finger protein 423	5.80111e-07	-3.45662	1.16733e-06	-3.10381	0.0662862	-1.20353	0.399341	-1.08069
Chd6	chromodomain helicase DNA binding protein 6	2.31629e-05	-2.09086	1.53993e-05	-2.18084	0.684008	-1.03631	0.384025	-1.08091
Ttc39a	tetratricopeptide repeat domain 39A	0.981653	1.00573	0.0180647	-2.04215	0.0287635	1.89881	0.752984	-1.08166
Ms4a8a	membrane-spanning 4-domains, subfamily A, member 8A	0.000400771	13.8409	5.63208e-05	32.8594	0.0705319	-2.5681	0.866429	-1.08172
Kif5b	kinesin family member 5B	3.89528e-06	2.04183	8.20704e-07	2.39976	0.00577345	-1.27145	0.256525	-1.08181
Klhl23	kelch-like 23 (Drosophila)	0.00014882	-2.66699	0.000183643	-2.58947	0.47787	-1.11471	0.602409	-1.08231
Atp11a	ATPase, class VI, type 11A	1.89986e-08	3.30008	2.1533e-08	3.23855	0.297669	-1.06221	0.182088	-1.08239
Nlk	nemo like kinase	4.82084e-05	-2.0312	1.31919e-05	-2.33113	0.532859	1.06027	0.403572	-1.08242
Gsta5	glutathione S-transferase Yc2 subunit	1.52633e-05	-3.56504	4.26614e-05	-3.01662	0.111156	-1.27931	0.580261	-1.08251
Sorl1	sortilin-related receptor, LDLR class A repeats-containing	3.40219e-08	-4.44021	1.93507e-08	-4.96022	0.6802	1.03164	0.306343	-1.08285
Echs1	enoyl Coenzyme A hydratase, short chain, 1, mitochondrial	8.70297e-06	-2.14507	1.92074e-05	-1.98537	0.0743939	-1.17006	0.328476	-1.08294
Gls	glutaminase	0.997084	1.00056	0.00156783	-1.99802	0.00321047	1.84562	0.603242	-1.08317
Ezh1	enhancer of zeste homolog 1 (Drosophila)	2.27153e-05	-2.25826	2.27788e-05	-2.25756	0.413549	-1.08357	0.415282	-1.08323
Iqub	IQ motif and ubiquitin domain containing	0.127424	-1.3118	0.000183502	-2.83224	0.0025552	1.9917	0.626827	-1.08402
Obsl1	obscurin-like 1	0.000270409	-3.16211	0.000746418	-2.68159	0.224676	-1.27869	0.676042	-1.08438
Dsg2	desmoglein 2	0.000182307	1.99282	0.00014007	2.04708	0.336445	-1.11403	0.464471	-1.0845
Afg3l1	AFG3(ATPase family gene 3)-like 1 (S. cerevisiae)	0.0272964	-1.88453	0.0173181	-2.02032	0.961279	-1.01185	0.738286	-1.08476
Dyrk3	dual-specificity tyrosine-(Y)-phosphorylation regulated kinase 3	4.10033e-05	2.23193	0.000198949	1.89909	0.445968	1.08301	0.435044	-1.08518
S100a3	S100 calcium binding protein A3	0.000204354	1.97818	0.000149976	2.04133	0.317795	-1.11983	0.463654	-1.08519
Sh3bgr	SH3 domain binding glutamic acid-rich protein	7.39684e-06	-4.08298	1.28485e-05	-3.69243	0.223258	-1.20004	0.569978	-1.08525
Map4k4	mitogen-activated protein kinase kinase kinase kinase 4	7.06239e-06	2.17652	2.32398e-05	1.93903	0.672478	1.03385	0.310002	-1.08573
Spata7	spermatogenesis associated 7	1.88016e-05	-2.00542	1.66433e-05	-2.02887	0.38827	-1.07323	0.319079	-1.08578
Heatr6	HEAT repeat containing 6	0.000244418	-1.78207	2.8748e-05	-2.18783	0.222016	1.13011	0.396125	-1.08634
Ccdc92	coiled-coil domain containing 92	0.000112082	-2.37667	6.90616e-05	-2.52764	0.867622	-1.0215	0.521453	-1.08639
Nudt4	nudix (nucleoside diphosphate linked moiety X)-type motif 4	1.36975e-07	-1.91743	5.78097e-08	-2.0685	0.849555	-1.00747	0.0597498	-1.08685
St6galnac2	ST6 (alpha-N-acetyl-neuraminyl-2,3-beta-galactosyl-1,3)-N-acetylgalactosaminide alpha-2	4.83661e-08	3.43721	2.48338e-08	3.83388	0.0156506	-1.21275	0.221392	-1.08728
S1pr2	sphingosine-1-phosphate receptor 2	1.95698e-05	2.34772	0.000229124	1.82808	0.119574	1.18113	0.406494	-1.0873
Slc2a13	solute carrier family 2 (facilitated glucose transporter), member 13	8.314e-06	-2.62327	3.29744e-06	-2.97585	0.671141	1.04329	0.409319	-1.08734
Ppp4r1	protein phosphatase 4, regulatory subunit 1	7.53712e-09	2.06273	8.17648e-09	2.04748	0.0309112	-1.07941	0.0208818	-1.08745
Znrf2	zinc and ring finger 2	3.12933e-06	-2.7874	5.78906e-07	-3.58858	0.0969902	1.18381	0.377376	-1.08753
Krt8	keratin 8	0.00318174	-2.23649	0.0513826	1.55769	0.000127288	-3.78891	0.676056	-1.08759
LOC100362894	Hypothetical protein LOC100362894	1.74351e-06	-17.0277	1.95869e-06	-16.3129	0.595832	-1.1354	0.724013	-1.08774
Fxyd4	FXYD domain-containing ion transport regulator 4	0.0697755	-1.8182	0.0228523	-2.23195	0.683938	1.12825	0.775341	-1.08802
Fndc1	fibronectin type III domain containing 1	0.00027136	2.86392	0.00036955	2.7312	0.834039	-1.03767	0.634438	-1.0881
Prss8	protease, serine, 8	0.00225216	-1.99657	0.000712104	-2.30169	0.722638	1.05932	0.604131	-1.08826
Kidins220	kinase D-interacting substrate 220	1.02981e-05	-1.81585	2.19507e-06	-2.08007	0.427885	1.05246	0.203809	-1.08841
Kdelr3	KDEL (Lys-Asp-Glu-Leu) endoplasmic reticulum protein retention receptor 3	6.18469e-07	5.31065	2.06304e-06	4.16691	0.219172	1.17089	0.494117	-1.08847
Tgm2	transglutaminase 2, C polypeptide	0.0971868	-1.47406	0.0616008	1.56642	0.00210678	-2.51372	0.691754	-1.08866
Lcn2	lipocalin 2	0.75637	-1.6357	0.734758	1.71204	0.487561	-3.05006	0.956924	-1.08916
Rps6ka5	ribosomal protein S6 kinase, polypeptide 5	0.0404651	-2.04407	0.0264848	-2.21395	0.984887	-1.00574	0.77758	-1.08932
Crk	V-crk sarcoma virus CT10 oncogene homolog (avian)	0.000356751	-1.78805	5.91107e-05	-2.12505	0.402878	1.09069	0.407835	-1.08965
LOC503192	zinc finger protein ZFP	3.26933e-06	-2.08018	1.51279e-05	-1.81652	0.00892638	-1.24789	0.219689	-1.08972
Afap1l2	actin filament associated protein 1-like 2	1.31258e-08	16.6741	7.35696e-09	20.6513	0.0391999	-1.34984	0.500053	-1.08987
Twf1	twinfilin, actin-binding protein, homolog 1 (Drosophila)	1.22984e-08	2.01999	4.87745e-08	1.80443	0.402414	1.02706	0.02138	-1.08997
Igsf8	immunoglobulin superfamily, member 8	5.73006e-05	2.12963	0.000103603	2.00422	0.80134	-1.02586	0.405269	-1.09005
RGD1311946	similar to RIKEN cDNA 1810055G02	7.10244e-06	3.44487	1.29682e-05	3.12942	0.937641	1.0098	0.495259	-1.09012
Xpc	xeroderma pigmentosum, complementation group C	7.45468e-06	-2.96256	2.68723e-06	-3.46724	0.528072	1.07293	0.439065	-1.0908
Lrtomt	leucine rich transmembrane and 0-methyltransferase domain containing	1.37788e-05	-3.49261	0.00090737	-1.98068	0.00119229	-1.92365	0.532778	-1.09091
Map2k6	mitogen-activated protein kinase kinase 6	5.6133e-05	-4.10748	2.35476e-05	-4.91909	0.62429	1.09762	0.646395	-1.09108
Cfl1	cofilin 1, non-muscle	8.25036e-09	5.19956	1.50903e-08	4.60542	0.627443	1.03455	0.230458	-1.0913
Urod	uroporphyrinogen decarboxylase	2.07472e-06	-2.16135	1.05272e-06	-2.3214	0.806449	-1.01633	0.207799	-1.09159
Ddit4	DNA-damage-inducible transcript 4	0.0143356	2.64123	0.0553809	2.01088	0.569285	1.20325	0.785767	-1.0916
Larp1b	La ribonucleoprotein domain family, member 1B	2.05027e-06	-2.04332	5.59526e-06	-1.86986	0.01737	-1.19355	0.17452	-1.09222
Rnf149	ring finger protein 149	3.53112e-06	2.04277	1.98584e-05	1.76252	0.377867	1.06114	0.202607	-1.09223
Zmym3	zinc finger, MYM-type 3	2.48281e-07	2.1688	7.46253e-08	2.46704	0.00213632	-1.24245	0.108017	-1.09225
Nadkd1	NAD kinase domain containing 1	0.00119247	-2.86598	0.00787682	-2.12903	0.110478	-1.4704	0.691898	-1.0923
Ccl6	chemokine (C-C motif) ligand 6	0.00444651	2.73252	0.00248526	3.04555	0.464957	-1.21772	0.739114	-1.09256
Gas6	growth arrest specific 6	1.14752e-07	-6.02604	6.84211e-08	-6.81232	0.748072	1.03466	0.41265	-1.09261
Fam49b	family with sequence similarity 49, member B	7.24788e-06	2.20893	7.01888e-06	2.21647	0.269804	-1.09636	0.286597	-1.09263
Mdh1	malate dehydrogenase 1, NAD (soluble)	0.00085708	-3.71101	0.00136111	-3.37883	0.492917	-1.20005	0.736083	-1.09263
Cdk105	CDK105 protein	4.02203e-05	-6.80031	2.51153e-05	-7.73267	0.870768	1.0406	0.717852	-1.09274
LOC498972	similar to copine II	0.00180417	2.02074	0.0169985	1.58615	0.347197	1.16582	0.579429	-1.09279
Jazf1	JAZF zinc finger 1	4.44299e-06	-2.28328	1.38505e-05	-2.03217	0.0266412	-1.22788	0.27485	-1.09284
Rb1	retinoblastoma 1	1.20705e-07	-2.12253	6.62359e-08	-2.25371	0.523109	-1.02928	0.0739221	-1.09289
Krt23	keratin 23 (histone deacetylase inducible)	0.00314009	8.36838	0.00339149	8.1328	0.908609	-1.06228	0.865828	-1.09306
Wee1	wee 1 homolog (S. pombe)	0.00278771	-1.56117	5.76958e-05	-2.23882	0.0320684	1.31174	0.419384	-1.09325
Trpm4	transient receptor potential cation channel, subfamily M, member 4	4.33644e-05	2.00609	0.000329104	1.68248	0.347638	1.09061	0.335023	-1.09328
Zbtb20	zinc finger and BTB domain containing 20	2.92351e-05	-2.11514	3.76304e-06	-2.68358	0.1321	1.16015	0.342042	-1.09361
Lmo4	LIM domain only 4	8.82771e-06	-5.81095	4.63769e-06	-6.8033	0.710771	1.07035	0.625864	-1.09382
Atrx	Alpha thalassemia/mental retardation syndrome X-linked (RAD54 homolog, S. cerevisiae)	0.00495192	1.80677	0.000321597	2.5224	0.0250736	-1.52752	0.575347	-1.09414
Ppp1r3c	protein phosphatase 1, regulatory (inhibitor) subunit 3C	1.63629e-07	-8.93917	4.13693e-07	-6.9875	0.0329523	-1.40018	0.509567	-1.09449
Pik3cd	phosphoinositide-3-kinase, catalytic, delta polypeptide	7.8084e-06	2.46156	6.29049e-06	2.52734	0.224342	-1.12447	0.337207	-1.0952
Trib3	tribbles homolog 3 (Drosophila)	0.00294178	2.54053	0.0313942	1.77952	0.265725	1.30315	0.690909	-1.09554
Laptm5	lysosomal protein transmembrane 5	0.000241995	4.05955	0.000509277	3.50049	0.805858	1.05847	0.693706	-1.09564
Nat8b	N-acetyltransferase 8B	0.00722915	-1.75279	0.00169324	-2.06727	0.651734	1.07634	0.576109	-1.09577
Sprr1al	small proline-rich protein 1A-like	0.000268229	2.54872	0.000949347	2.16164	0.643322	1.07569	0.561872	-1.09611
Tpi1	triosephosphate isomerase 1	1.35591e-05	3.43523	1.26166e-05	3.47692	0.452219	-1.10944	0.504735	-1.09613
Arnt2	aryl hydrocarbon receptor nuclear translocator 2	2.30187e-08	-5.96878	1.77685e-08	-6.33569	0.708556	-1.03271	0.301076	-1.09619
Depdc7	DEP domain containing 7	0.000300339	3.37374	0.000733469	2.88985	0.761826	1.06488	0.658623	-1.09631
DIP2B	DIP2 disco-interacting protein 2 homolog B (Drosophila)	5.75599e-06	3.03949	3.04376e-06	3.352	0.109588	-1.20921	0.408316	-1.09648
Man2a1	mannosidase, alpha, class 2A, member 1	0.000626237	1.67255	3.12314e-05	2.21292	0.00434075	-1.45176	0.356199	-1.09726
Nlk /// RGD1561440	nemo like kinase /// similar to nemo like kinase	7.15995e-06	-2.10681	3.6304e-06	-2.26035	0.764815	-1.0228	0.237993	-1.09734
Lilrb4	leukocyte immunoglobulin-like receptor, subfamily B, member 4	1.58935e-07	8.24821	2.29074e-07	7.48798	0.97709	1.00373	0.480047	-1.09744
Calu	calumenin	2.53741e-08	3.98155	7.73821e-08	3.31625	0.20473	1.09397	0.190544	-1.09749
Pgrmc2	progesterone receptor membrane component 2	2.20852e-07	-2.57852	1.46215e-07	-2.71469	0.498629	-1.04254	0.15181	-1.09759
Slc12a7	solute carrier family 12 (potassium/chloride transporters), member 7	1.1765e-05	2.1335	1.71779e-05	2.05432	0.499916	-1.05753	0.270318	-1.09829
Sorl1	sortilin-related receptor, LDLR class A repeats-containing	1.623e-06	-4.2472	6.16528e-07	-5.15709	0.414944	1.10507	0.441008	-1.09878
Sbno2	strawberry notch homolog 2 (Drosophila)	4.81885e-05	2.14779	7.10111e-05	2.06272	0.592588	-1.05547	0.358364	-1.099
Marcks	myristoylated alanine rich protein kinase C substrate	8.4798e-06	2.03187	1.86834e-06	2.37766	0.00750083	-1.28621	0.219018	-1.09916
Crim1	cysteine rich transmembrane BMP regulator 1 (chordin like)	2.26452e-05	-2.08087	4.57806e-06	-2.48064	0.360391	1.08456	0.291226	-1.09917
Phf7	PHD finger protein 7	7.28395e-07	-3.29213	1.82322e-06	-2.87848	0.0289397	-1.25756	0.3032	-1.09956
Capn5	calpain 5	1.53207e-05	-2.08614	1.64314e-05	-2.0717	0.236511	-1.10726	0.267238	-1.0996
Accn4	amiloride-sensitive cation channel 4, pituitary	4.93282e-07	-9.36325	1.8865e-07	-12.5723	0.230751	1.22102	0.554274	-1.09967
Cps1	carbamoyl-phosphate synthetase 1	2.40872e-08	-9.59349	3.21561e-07	-5.07169	0.000121242	-2.08023	0.394903	-1.09974
Cds1	CDP-diacylglycerol synthase 1	4.76815e-08	-2.12699	2.91918e-08	-2.23293	0.261292	-1.04763	0.0386422	-1.09981
Sec24d	SEC24 family, member D (S. cerevisiae)	2.12577e-08	3.35811	1.80397e-08	3.44481	0.0624019	-1.12825	0.126234	-1.09986
Tceanc2	transcription elongation factor A (SII) N-terminal and central domain containing	0.000107207	-2.08629	0.000365906	-1.84855	0.0705345	-1.243	0.381782	-1.10136
Mylip	myosin regulatory light chain interacting protein	1.45222e-06	-5.13168	1.10055e-06	-5.45023	0.784186	-1.03736	0.475719	-1.10176
Ezh1	enhancer of zeste homolog 1 (Drosophila)	0.000241287	-2.01362	0.000171101	-2.08772	0.59996	-1.06288	0.409872	-1.10199
Samd11	Sterile alpha motif domain containing 11	0.000147611	-2.4058	0.000243225	-2.26174	0.257463	-1.17231	0.477185	-1.10211
Akt3	V-akt murine thymoma viral oncogene homolog 3 (protein kinase B, gamma)	0.00733532	2.31583	0.197816	1.39196	0.118755	1.50896	0.689331	-1.10256
Ddit4l /// LOC100364537	DNA-damage-inducible transcript 4-like /// DNA-damage-inducible transcript 4-like prote	0.000489258	-1.71263	5.55932e-05	-2.09262	0.314284	1.10793	0.335143	-1.10285
Rab27a	RAB27A, member RAS oncogene family	0.000398139	-1.98158	0.000145448	-2.21112	0.923996	1.01165	0.428719	-1.10299
Telo2	TEL2, telomere maintenance 2, homolog (S. cerevisiae)	3.56581e-05	-2.14264	1.05838e-05	-2.45753	0.685134	1.03972	0.320157	-1.10314
Usp46	ubiquitin specific peptidase 46	2.54766e-05	-2.34975	7.56497e-05	-2.08417	0.0588264	-1.24394	0.350237	-1.10335
Ctsc	cathepsin C	3.36445e-06	2.88808	4.15158e-06	2.80533	0.480404	-1.07187	0.324381	-1.10349
MSN	moesin	3.67946e-11	184.318	4.00377e-11	174.461	0.696106	-1.04462	0.387031	-1.10365
Sorl1	sortilin-related receptor, LDLR class A repeats-containing	5.05698e-08	-4.55398	3.27957e-08	-4.96239	0.872763	-1.01297	0.240574	-1.10381
LOC100362119	Zinc finger protein 383-like	7.87135e-06	-2.41981	5.54962e-06	-2.52403	0.532644	-1.0587	0.289604	-1.1043
Spry1	sprouty homolog 1, antagonist of FGF signaling (Drosophila)	5.5053e-06	-5.34786	6.75903e-06	-5.11153	0.387903	-1.15546	0.547849	-1.1044
Sult1b1	sulfotransferase family, cytosolic, 1B, member 1	0.0131068	2.06849	0.171691	1.41019	0.250493	1.32798	0.675555	-1.10455
Farp1	FERM, RhoGEF (Arhgef) and pleckstrin domain protein 1 (chondrocyte-derived)	6.3809e-05	5.29919	0.000117705	4.61275	0.862661	1.04004	0.662882	-1.10458
C1qa	complement component 1, q subcomponent, A chain	0.000126874	4.08168	0.000331962	3.39242	0.687213	1.0891	0.639084	-1.10474
Ralgps2	Ral GEF with PH domain and SH3 binding motif 2	2.78537e-06	-2.62323	1.04441e-06	-2.99372	0.711912	1.03234	0.262438	-1.10548
Emx2	empty spiracles homeobox 2	6.03035e-07	-3.49065	3.8516e-07	-3.76087	0.778273	-1.02605	0.28899	-1.10548
RGD1304644	similar to RIKEN cDNA 2310046K01	0.00175254	-1.60037	0.596534	-1.05795	0.00100871	-1.67279	0.353803	-1.10582
Syt8	synaptotagmin VIII	7.43612e-07	-3.65469	5.83818e-07	-3.80868	0.545196	-1.06123	0.315639	-1.10594
Map4k3	mitogen-activated protein kinase kinase kinase kinase 3	1.3036e-06	-2.0149	5.16533e-07	-2.20353	0.842435	-1.0113	0.102838	-1.10597
Atp5s	ATP synthase, H+ transporting, mitochondrial F0 complex, subunit s (factor B)	5.30242e-05	-2.50303	4.56572e-05	-2.55189	0.508197	-1.08503	0.416586	-1.1062
Cgn	Cingulin	1.9719e-08	-3.82605	1.33239e-08	-4.0968	0.607141	-1.03328	0.137011	-1.1064
Fam113b	family with sequence similarity 113, member B	7.91865e-05	-2.56939	8.88888e-05	-2.53031	0.38993	-1.12361	0.452625	-1.10652
Fn3krp	fructosamine-3-kinase-related protein	2.30385e-06	-3.25959	1.88362e-06	-3.36434	0.502983	-1.0722	0.337788	-1.10666
Wdr31	WD repeat domain 31	1.85129e-05	-2.32239	5.03682e-05	-2.0837	0.0552809	-1.23348	0.310332	-1.1067
Gpc2	glypican 2	0.022574	1.37387	0.0122043	-1.43792	0.000889523	1.78419	0.392595	-1.10723
Cited2	Cbp/p300-interacting transactivator, with Glu/Asp-rich carboxy-terminal domain, 2	0.000117977	-2.06895	5.15548e-05	-2.26442	0.91366	-1.01177	0.35795	-1.10736
Casp12	caspase 12	0.285595	1.75887	0.129599	2.30188	0.473395	-1.44957	0.841083	-1.10762
Myocd	myocardin	0.00375959	2.03474	0.000679085	2.56827	0.0934223	-1.39812	0.577276	-1.10768
Sesn1	sestrin 1	0.00801233	-2.22228	0.001221	-3.04067	0.381262	1.23498	0.664683	-1.10793
Bcl11b	B-cell CLL/lymphoma 11B (zinc finger protein)	0.00139816	2.27695	0.0555626	1.47059	0.0881385	1.39726	0.567736	-1.10812
Ankrd6	ankyrin repeat domain 6	7.93614e-06	4.81943	1.76854e-05	4.10269	0.719806	1.05963	0.526918	-1.10859
Sel1l	sel-1 suppressor of lin-12-like (C. elegans)	7.93546e-06	2.24927	6.53166e-06	2.29782	0.159717	-1.13261	0.234986	-1.10868
LOC688749	Similar to Tubby-related protein 3 (Tubby-like protein 3)	5.60801e-06	2.18466	1.01628e-05	2.05805	0.571788	-1.04455	0.199958	-1.10882
LOC100366121	rCG29408-like	3.73786e-06	-2.76744	2.37973e-06	-2.94566	0.665873	-1.04176	0.290409	-1.10885
Csf2ra	Granulocyte-macrophage colony stimulating receptor alpha	7.7142e-05	-2.24574	6.02298e-05	-2.31107	0.514316	-1.07759	0.372732	-1.10894
Sfrs18	splicing factor, arginine/serine-rich 18	0.00109098	-2.00674	0.000338863	-2.3042	0.812681	1.03491	0.479476	-1.1095
Syde2-ps1	Synapse defective 1, Rho GTPase, homolog 2 (C. elegans), pseudogene 1	4.66628e-05	-2.966	7.40605e-05	-2.77062	0.244951	-1.18782	0.470168	-1.10957
Dgka	diacylglycerol kinase, alpha	1.78269e-05	2.16622	0.000775751	1.56575	0.0325074	1.24684	0.258132	-1.10961
Ifngr2	interferon gamma receptor 2	2.05294e-08	-3.72828	2.82221e-08	-3.53896	0.0319539	-1.16929	0.122048	-1.10991
Mx1	myxovirus (influenza virus) resistance 1	0.736973	1.32253	0.198333	3.08757	0.270175	-2.5913	0.899936	-1.10996
Hspa12a	heat shock 70kDa protein 12A	1.03874e-07	-3.26844	1.74863e-08	-4.41858	0.0183083	1.21788	0.156316	-1.11004
Tesk2	testis-specific kinase 2	4.33123e-06	-2.0546	6.57395e-05	-1.64448	0.00109592	-1.3869	0.151408	-1.11006
Zbtb5	zinc finger and BTB domain containing 5	2.53437e-05	-1.62707	1.79049e-06	-2.00083	0.107739	1.10763	0.101121	-1.11022
Pgk1	phosphoglycerate kinase 1	5.42386e-07	2.23227	1.14539e-06	2.07252	0.589671	-1.03193	0.0955831	-1.11148
Bcr	breakpoint cluster region	1.02954e-05	2.20794	0.00059179	1.56038	0.0178694	1.27305	0.229643	-1.1115
Dapl1	death associated protein-like 1	2.48509e-06	-18.2357	1.34179e-06	-23.2768	0.590324	1.14835	0.679474	-1.11154
Polb	polymerase (DNA directed), beta	5.50011e-05	-1.8263	1.49306e-05	-2.05554	0.881442	1.01204	0.208811	-1.11213
Lap3	leucine aminopeptidase 3	2.6013e-05	2.34039	7.13753e-05	2.09399	0.961583	1.00493	0.313936	-1.11219
Prdx4	peroxiredoxin 4	7.30161e-07	2.90448	6.01964e-07	2.98401	0.122194	-1.14276	0.205383	-1.1123
Apbb1ip	amyloid beta (A4) precursor protein-binding, family B, member 1 interacting protein	0.00500284	2.08023	0.00512672	2.0734	0.602764	-1.1091	0.591503	-1.11275
RGD1566215	Similar to Coatomer gamma-2 subunit (Gamma-2 coat protein) (Gamma-2 COP)	0.326546	1.3052	0.209603	-1.41586	0.0817671	1.66066	0.686004	-1.1128
Atat1	alpha tubulin acetyltransferase 1	5.40749e-06	-1.9686	6.78528e-07	-2.43314	0.138631	1.1106	0.132065	-1.11288
RGD1565033	similar to hypothetical protein LOC284018 isoform b	1.96823e-05	-3.26454	1.46258e-05	-3.42736	0.66862	-1.06065	0.440565	-1.11355
Dap	death-associated protein	1.45508e-06	-3.51523	1.16445e-06	-3.64801	0.494712	-1.07383	0.308384	-1.1144
Fut1	fucosyltransferase 1	5.67699e-05	4.18261	0.000713337	2.68192	0.107766	1.39927	0.574974	-1.11455
Sema5a	sema domain, seven thrombospondin repeats (type 1 and type 1-like), transmembrane domai	2.51393e-05	-2.3266	4.57548e-05	-2.17587	0.110333	-1.19197	0.299018	-1.11474
Dap	Death-associated protein	2.97888e-05	-2.34511	0.000440167	-1.78391	0.00535969	-1.46575	0.312876	-1.11498
MGC94335	similar to hypothetical protein FLJ22555	0.0258704	-1.43262	0.729505	-1.0483	0.0126386	-1.52396	0.432013	-1.11514
Tnfrsf12a	tumor necrosis factor receptor superfamily, member 12a	2.97053e-07	12.0719	1.7158e-07	14.4815	0.107273	-1.33811	0.515437	-1.11546
Chn1	chimerin (chimaerin) 1	7.39586e-06	-2.53526	1.29481e-06	-3.22429	0.189328	1.13999	0.265275	-1.1156
PARVA	parvin, alpha	2.43308e-06	3.41351	3.46395e-06	3.22817	0.619066	-1.05527	0.322774	-1.11585
Crip2	cysteine-rich protein 2	6.01555e-06	2.5575	8.32101e-06	2.45768	0.454039	-1.07312	0.253371	-1.1167
CTSC	cathepsin C	1.27201e-06	3.04014	2.59182e-06	2.75368	0.894778	-1.01189	0.23639	-1.11715
Dync1i1	dynein cytoplasmic 1 intermediate chain 1	4.65479e-11	-30.5626	4.02281e-11	-32.5549	0.530802	-1.04883	0.166329	-1.11721
Zfp316	zinc finger protein 316	4.96249e-07	-2.24289	6.1447e-08	-2.87492	0.0387233	1.14731	0.0814939	-1.11722
Bcl6	B-cell CLL/lymphoma 6	0.00372658	-1.50105	2.74219e-05	-2.35675	0.0096358	1.40454	0.299809	-1.11785
Lamb3	laminin, beta 3	7.35765e-07	9.10392	1.53537e-06	7.44089	0.588145	1.09451	0.506217	-1.11785
Mtm1	myotubularin 1	1.0175e-05	-1.83152	3.61795e-06	-2.00273	0.730466	-1.02237	0.109875	-1.11794
Sorl1	sortilin-related receptor, LDLR class A repeats-containing	9.46462e-08	-5.75754	5.87838e-08	-6.4251	0.985664	-1.00181	0.285624	-1.11796
Prkag2	protein kinase, AMP-activated, gamma 2 non-catalytic subunit	1.61982e-06	-2.4071	1.98467e-06	-2.35224	0.0929469	-1.14404	0.152684	-1.11797
Stx7	syntaxin 7	1.65338e-07	-2.64163	7.84931e-08	-2.91108	0.807617	-1.01473	0.0905639	-1.11823
Fam104a	family with sequence similarity 104, member A	1.16807e-05	-2.1057	1.74579e-06	-2.60695	0.228873	1.10657	0.186631	-1.11881
Ddah2	dimethylarginine dimethylaminohydrolase 2	1.02527e-05	-3.16342	1.57524e-06	-4.37471	0.110857	1.23578	0.368836	-1.11905
Scarb1	scavenger receptor class B, member 1	0.000125058	3.68973	0.000161819	3.51793	0.740697	-1.06702	0.568615	-1.11913
Mgst1	microsomal glutathione S-transferase 1	5.30441e-05	2.21215	5.92527e-05	2.18533	0.352396	-1.10592	0.300472	-1.1195
Fcho2	FCH domain only 2	0.186616	-1.4103	0.0102717	-2.21301	0.194231	1.40112	0.64686	-1.11994
Ggta1	glycoprotein, alpha-galactosyltransferase 1	0.00190647	2.66148	0.00137824	2.80893	0.460326	-1.18214	0.613399	-1.12009
Capn1	calpain 1	2.64435e-06	-2.38881	1.35206e-06	-2.58778	0.662092	-1.03442	0.165475	-1.12058
Dusp6	dual specificity phosphatase 6	0.0655549	2.41615	0.113824	2.08407	0.936834	1.03441	0.789837	-1.12078
Col14a1	collagen, type XIV, alpha 1	7.66621e-08	-17.4657	6.28912e-08	-18.7916	0.797874	-1.0419	0.48229	-1.12099
Tgfbr1	transforming growth factor, beta receptor 1	5.49939e-05	-1.80822	1.25871e-05	-2.06507	0.814787	1.01868	0.17326	-1.1211
Tec	tec protein tyrosine kinase	4.16452e-06	2.34144	6.87726e-05	1.78774	0.080599	1.16732	0.175213	-1.12199
Gyg1	glycogenin 1	8.48452e-06	-2.49261	3.69949e-06	-2.77308	0.927775	-1.00858	0.242822	-1.12206
Ypel4	yippee-like 4 (Drosophila)	6.54106e-07	-7.92849	4.62819e-07	-8.71661	0.893342	-1.02067	0.458082	-1.12212
Ostc	oligosaccharyltransferase complex subunit	6.12872e-07	2.16856	1.36333e-06	2.00903	0.498532	-1.03961	0.0685716	-1.12216
Magi3	membrane associated guanylate kinase, WW and PDZ domain containing 3	3.87799e-05	-1.84088	1.41685e-05	-2.01446	0.745246	-1.02556	0.162784	-1.12226
St5	suppression of tumorigenicity 5	0.00120711	2.22238	0.016969	1.63305	0.27165	1.2126	0.499876	-1.12228
Zfp637	zinc finger protein 637	2.47526e-05	-1.84584	9.25298e-06	-2.01443	0.70077	-1.02863	0.141323	-1.12257
Cited2	Cbp/p300-interacting transactivator, with Glu/Asp-rich carboxy-terminal domain, 2	0.000565569	-2.11864	0.000123717	-2.56173	0.601493	1.07686	0.419696	-1.12284
LOC680770	similar to dachshund b [Rattus norvegicus]	5.84587e-05	-2.71464	5.99292e-05	-2.70524	0.384626	-1.12702	0.397924	-1.12311
Tagln2	transgelin 2	9.67745e-08	2.25747	2.35861e-08	2.65016	0.000294856	-1.31858	0.0338814	-1.12319
Cyhr1	cysteine and histidine rich 1	0.000786766	-2.33796	0.000739801	-2.35729	0.524363	-1.114	0.494115	-1.12321
Trim2	tripartite motif-containing 2	5.35962e-08	-2.80838	2.33992e-08	-3.14995	0.979294	-1.00143	0.0614811	-1.12323
Rprd1a	regulation of nuclear pre-mRNA domain containing 1A	5.89058e-05	2.67173	3.27909e-05	2.90394	0.157085	-1.22136	0.38914	-1.1237
Sdc1	syndecan 1	1.79202e-08	-2.11762	7.76992e-09	-2.30263	0.359162	-1.03342	0.00868222	-1.12371
Klf7	Kruppel-like factor 7 (ubiquitous)	8.51357e-06	5.69322	1.62445e-05	4.92459	0.874488	1.02878	0.521448	-1.12373
Uba5	ubiquitin-like modifier activating enzyme 5	1.22343e-06	2.07267	2.60086e-06	1.93538	0.41522	-1.04969	0.0718342	-1.12415
Prr12	proline rich 12	1.55718e-05	-2.26982	1.50539e-05	-2.27838	0.237333	-1.12032	0.223487	-1.12455
Epha7	Eph receptor A7	2.64739e-06	3.22779	1.16224e-05	2.6181	0.386545	1.0963	0.275869	-1.12458
Purg	Purine-rich element binding protein G	0.0219429	-1.55801	0.00180022	-2.04659	0.349649	1.16801	0.473969	-1.12464
RGD1562344	similar to Gm566 protein	0.00200437	2.18257	0.00555446	1.91949	0.953152	1.01057	0.515815	-1.12517
Cdo1	cysteine dioxygenase, type I	9.5999e-07	-8.38469	8.39012e-07	-8.70553	0.627795	-1.08375	0.480774	-1.12522
LOC100364718	myeloid/lymphoid or mixed-lineage leukemia 3-like	0.000112477	-1.41652	2.24744e-07	-2.22467	0.000152765	1.39542	0.0447555	-1.12549
RGD1563441	similar to RIKEN cDNA A030009H04	1.04096e-05	-2.91052	9.09612e-06	-2.9679	0.393184	-1.10416	0.311514	-1.12593
Irf7	interferon regulatory factor 7	0.0109278	-2.33085	0.0179238	-2.14276	0.452403	-1.22483	0.656289	-1.12599
LOC100909946	uncharacterized LOC100909946	4.74881e-06	2.80282	2.41108e-05	2.28917	0.406274	1.08721	0.248113	-1.12617
Slc47a1	solute carrier family 47, member 1	0.00746608	2.00862	0.0678505	1.51304	0.427822	1.17811	0.559723	-1.12684
Homer3	homer homolog 3 (Drosophila)	0.000414258	2.12069	0.000949151	1.93688	0.829824	-1.0293	0.384851	-1.12698
Fam188a	family with sequence similarity 188, member A	2.62577e-06	-1.78045	3.07032e-07	-2.14375	0.217228	1.06836	0.0417405	-1.127
Foxn3	forkhead box N3	1.51885e-05	-1.71066	1.43471e-06	-2.0842	0.218466	1.08063	0.0726751	-1.12745
Kitlg	KIT ligand	0.0081007	2.42422	0.00405409	2.7396	0.366524	-1.27416	0.648184	-1.12747
RGD1562012	RGD1562012	7.80792e-06	-2.45282	1.7204e-05	-2.24037	0.044971	-1.23445	0.213097	-1.12753
Lgals9	lectin, galactoside-binding, soluble, 9	0.496438	-1.22223	0.135103	1.59698	0.0231764	-2.20086	0.681178	-1.12756
Slc39a13	solute carrier family 39 (zinc transporter), member 13	2.20778e-06	2.2335	2.79868e-06	2.17908	0.193007	-1.10026	0.111529	-1.12774
RASGRP1	RAS guanyl releasing protein 1 (calcium and DAG-regulated)	5.22906e-05	2.67317	0.0203273	1.43866	0.00416967	1.64748	0.367734	-1.12785
Mthfd2l	methylenetetrahydrofolate dehydrogenase (NADP+ dependent) 2-like	0.0002844	2.43363	9.83994e-05	2.82288	0.101806	-1.30828	0.431915	-1.12788
Tk1	thymidine kinase 1, soluble	5.833e-05	1.95723	2.51358e-06	2.79299	0.000611191	-1.60967	0.20548	-1.128
Cpsf7	cleavage and polyadenylation specific factor 7, 59kDa	4.6201e-06	1.78255	7.47441e-07	2.08317	0.000825111	-1.31921	0.0526012	-1.12884
LOC680039	hypothetical protein LOC680039	2.01431e-07	-2.09508	3.40755e-08	-2.52945	0.177106	1.06944	0.0282015	-1.12893
Gca	grancalcin	2.3299e-05	-2.78973	1.58e-05	-2.94954	0.590956	-1.06805	0.331635	-1.12923
Nat15	N-acetyltransferase 15 (GCN5-related, putative)	3.47325e-05	-2.07454	7.363e-05	-1.92921	0.0592028	-1.21436	0.206146	-1.12929
Aig1	androgen-induced 1	1.6429e-05	2.2727	5.71404e-05	1.99669	0.936212	1.00744	0.210837	-1.12983
Pibf1	progesterone immunomodulatory binding factor 1	0.00112967	-1.76389	0.0446142	-1.31403	0.00665647	-1.51747	0.316607	-1.13046
Pecr	peroxisomal trans-2-enoyl-CoA reductase	3.9457e-08	-6.82264	1.46501e-08	-8.82562	0.196373	1.14428	0.235567	-1.13048
Nrcam	neuronal cell adhesion molecule	0.0124701	-1.51274	0.404904	-1.12015	0.011184	-1.52699	0.369004	-1.13071
Dph3	DPH3, KTI11 homolog (S. cerevisiae)	1.9871e-06	2.12977	7.42781e-07	2.362	0.00668316	-1.25413	0.0842083	-1.13082
Jdp2	Jun dimerization protein 2	0.0119205	-1.82787	0.00571495	-2.00677	0.877765	-1.03003	0.527776	-1.13084
Kctd17	potassium channel tetramerisation domain containing 17	0.00946856	-1.48196	0.000242321	-2.0673	0.108195	1.23328	0.319055	-1.13111
Arl4d	ADP-ribosylation factor-like 4D	0.0237253	-1.89085	0.00614622	-2.32446	0.725231	1.08683	0.604765	-1.13111
Pigh	phosphatidylinositol glycan anchor biosynthesis, class H	2.85464e-06	-2.89097	2.0489e-06	-3.03098	0.432541	-1.07887	0.216677	-1.13112
Pam	peptidylglycine alpha-amidating monooxygenase	3.42173e-08	-8.54538	2.09889e-08	-9.80407	0.896117	1.01424	0.273814	-1.13119
LOC690274	hypothetical protein LOC690274	6.0329e-05	-2.28269	2.68291e-05	-2.51806	0.821209	-1.02553	0.28618	-1.13127
Cited4	Cbp/p300-interacting transactivator, with Glu/Asp-rich carboxy-terminal domain, 4	5.40056e-05	-2.25962	1.98885e-05	-2.54875	0.976677	-1.00317	0.272899	-1.13153
Marveld1	MARVEL domain containing 1	0.000794502	-2.0582	0.000494554	-2.17462	0.630516	-1.07147	0.395136	-1.13208
Klc3	kinesin light chain 3	5.80915e-05	-1.66931	1.02201e-06	-2.4136	0.00632236	1.27701	0.0994336	-1.13223
Edem3	ER degradation enhancer, mannosidase alpha-like 3	1.0895e-05	-2.10512	5.41768e-06	-2.2643	0.5219	-1.0529	0.144609	-1.13252
Rab11fip1	RAB11 family interacting protein 1 (class I)	0.000271432	-1.59863	1.30554e-05	-2.05223	0.138735	1.13344	0.140774	-1.1326
Vps26b	vacuolar protein sorting 26 homolog B (S. pombe)	0.000123375	-1.89777	7.01509e-05	-2.00217	0.464635	-1.0738	0.215385	-1.13287
Fkbp5	FK506 binding protein 5	4.24386e-06	-2.85206	3.34716e-07	-4.3047	0.0171544	1.33161	0.226248	-1.13347
Nr1d1	nuclear receptor subfamily 1, group D, member 1	2.40659e-05	-2.64107	5.66731e-05	-2.36949	0.0699289	-1.2634	0.295016	-1.13349
Xrcc1	X-ray repair complementing defective repair in Chinese hamster cells 1	8.97827e-06	-1.86692	7.85803e-07	-2.36414	0.116156	1.11718	0.0814872	-1.1335
Snx8	sorting nexin 8	0.000381956	-2.11003	0.000872206	-1.92975	0.129959	-1.24029	0.352217	-1.13432
Nipsnap3b	nipsnap homolog 3B (C. elegans)	1.4416e-08	3.24803	5.02102e-09	3.84284	0.000454505	-1.34211	0.0404235	-1.13437
Dip2a	DIP2 disco-interacting protein 2 homolog A (Drosophila)	9.36371e-06	2.6209	0.000165322	1.90908	0.0866033	1.21005	0.232089	-1.13455
Evi2a	ecotropic viral integration site 2A	4.80298e-05	3.73479	0.000283205	2.77722	0.338445	1.18521	0.470861	-1.13464
Mthfs	5,10-methenyltetrahydrofolate synthetase (5-formyltetrahydrofolate cyclo-ligase)	4.23511e-05	-2.10963	0.000201535	-1.81831	0.0181498	-1.31657	0.210743	-1.13476
RGD1563325	Similar to hypothetical protein MGC17943	0.000157591	2.34492	0.000193958	2.28618	0.451775	-1.10636	0.351396	-1.13478
Osap	ovary-specific acidic protein	0.000102845	-2.11705	3.27861e-05	-2.4117	0.972716	1.00374	0.265636	-1.13494
Fabp5	fatty acid binding protein 5, epidermal	8.48283e-09	6.57317	8.56264e-08	4.07032	0.00182355	1.42287	0.139467	-1.13496
Fhod1	formin homology 2 domain containing 1	5.49503e-07	2.42848	1.79401e-06	2.1397	0.998923	-1.00009	0.0750007	-1.13506
RT1-Ba	RT1 class II, locus Ba	0.000735179	4.80543	0.00164187	3.97339	0.836055	1.06547	0.680497	-1.13509
Lingo4 /// Rorc	leucine rich repeat and Ig domain containing 4 /// RAR-related orphan receptor C	0.000162667	-3.18232	0.000644731	-2.56479	0.0850901	-1.40848	0.487917	-1.13516
Rab4a	RAB4A, member RAS oncogene family	1.02792e-06	-1.98148	2.8656e-07	-2.24057	0.937573	-1.00419	0.0396528	-1.1355
Wwc1	WW and C2 domain containing 1	1.8719e-05	-2.0243	7.41127e-05	-1.79126	0.012914	-1.28384	0.142681	-1.13605
RGD1562988	Similar to EHM2	7.00437e-05	-2.68694	2.82316e-05	-3.06946	0.970099	1.00512	0.36059	-1.13655
Rev3l	REV3-like, catalytic subunit of DNA polymerase zeta (yeast)	1.02415e-06	-2.83229	7.74773e-07	-2.9433	0.287219	-1.09397	0.14214	-1.13685
Ankrd12	Ankyrin repeat domain 12	3.94039e-06	-3.26734	1.49662e-06	-3.83681	0.770379	1.03281	0.264121	-1.13699
Chsy1	chondroitin sulfate synthase 1	2.32383e-07	6.38147	4.23428e-07	5.55988	0.939654	1.00908	0.298296	-1.13744
Dct	Dopachrome tautomerase (dopachrome delta-isomerase, tyrosine-related protein 2)	6.31453e-10	-10.8159	9.05732e-10	-9.73149	0.0100867	-1.26555	0.101957	-1.13866
Rtn4	reticulon 4	8.20611e-09	5.82242	2.72174e-08	4.54188	0.139094	1.12533	0.107463	-1.13917
Mab21l1	mab-21-like 1 (C. elegans)	5.91172e-06	-3.87179	3.84746e-06	-4.19169	0.701218	-1.05264	0.340621	-1.13962
LOC688452	hypothetical protein LOC688452	0.000747453	2.77278	0.00456377	2.12319	0.501788	1.14556	0.516752	-1.14001
Rab31	RAB31, member RAS oncogene family	6.68055e-09	21.259	6.20374e-09	21.879	0.224634	-1.17342	0.311857	-1.14017
LOC100361542	hypothetical protein LOC100361542	2.42551e-07	-2.52952	4.37853e-08	-3.17441	0.138648	1.10061	0.0544566	-1.14022
Appbp2	amyloid beta precursor protein (cytoplasmic tail) binding protein 2	2.2821e-06	-2.20386	3.4386e-05	-1.73155	0.00050252	-1.45161	0.0830129	-1.14051
UTP6	UTP6, small subunit (SSU) processome component, homolog (yeast)	0.00125743	-1.5289	4.15318e-05	-2.02157	0.129166	1.15929	0.17068	-1.14056
Fblim1	filamin binding LIM protein 1	9.23568e-08	32.9489	2.62758e-07	21.2555	0.152582	1.35883	0.516258	-1.14079
B4galt5	UDP-Gal:betaGlcNAc beta 1,4-galactosyltransferase, polypeptide 5	0.00130172	2.11123	0.00409206	1.84914	0.998296	1.00034	0.417486	-1.14135
Lrpap1	low density lipoprotein receptor-related protein associated protein 1	0.000382093	-2.7639	0.00224743	-2.15266	0.0590126	-1.46549	0.468377	-1.14139
Slc5a3	solute carrier family 5 (inositol transporters), member 3	0.00341798	2.68702	0.00642979	2.41263	0.921361	-1.02484	0.597898	-1.1414
Peli1	pellino 1	0.00348338	-1.68706	0.000567289	-2.02269	0.711602	1.0502	0.330497	-1.14163
Anxa2	Annexin A2	0.00288069	1.90457	0.956621	1.00859	0.0108312	1.65368	0.409098	-1.14191
Pf4	platelet factor 4	0.00174467	2.43224	0.00224039	2.34494	0.630914	-1.1012	0.510417	-1.1422
Zfp189	zinc finger protein 189	0.000386232	-2.37482	0.000488621	-2.30387	0.30029	-1.17816	0.393119	-1.14296
Crabp2	cellular retinoic acid binding protein 2	6.82506e-10	3.83233	7.74251e-08	2.09232	2.51082e-06	1.60137	0.0100304	-1.14378
Fads3	fatty acid desaturase 3	1.29599e-05	3.70872	5.41385e-05	2.93644	0.496001	1.10401	0.360601	-1.14401
LOC683460	hypothetical protein LOC683460	0.00343233	-1.67029	0.000299336	-2.13664	0.399021	1.11788	0.312601	-1.14431
Tpm3	tropomyosin 3, gamma	5.22332e-07	2.79924	3.66593e-07	2.93732	0.0333329	-1.20099	0.0952203	-1.14453
LOC100911466	uncharacterized LOC100911466	1.10959e-05	-2.51004	6.19984e-06	-2.70443	0.544152	-1.06229	0.194713	-1.14456
CRIM1	cysteine rich transmembrane BMP regulator 1 (chordin-like)	0.000263021	-1.88305	8.15438e-05	-2.11637	0.862497	-1.01846	0.22309	-1.14466
Tubb2a	tubulin, beta 2a	9.61791e-08	5.86723	1.36901e-07	5.42626	0.579274	-1.0587	0.208085	-1.14473
STK17B	serine/threonine kinase 17b	1.04403e-05	2.48684	1.81686e-05	2.32862	0.479525	-1.07193	0.186887	-1.14477
Ssbp3	single stranded DNA binding protein 3	1.86261e-05	-1.89061	4.81222e-06	-2.14643	0.909591	-1.00833	0.0926308	-1.14478
Crot	carnitine O-octanoyltransferase	4.13254e-05	-2.23351	5.16317e-05	-2.17943	0.147179	-1.17349	0.211218	-1.14507
Tln2	talin 2	1.76308e-05	-2.47854	3.01247e-05	-2.32466	0.0814257	-1.22093	0.213077	-1.14513
Dapk1	death associated protein kinase 1	4.29834e-07	-3.01931	1.56541e-07	-3.51951	0.820804	1.01764	0.106632	-1.14546
Rap1gds1	RAP1, GTP-GDP dissociation stimulator 1	1.63933e-06	2.20739	1.20937e-06	2.27936	0.0298563	-1.18292	0.0654578	-1.14557
Pigp	phosphatidylinositol glycan anchor biosynthesis, class P	2.30611e-06	-1.97718	2.9529e-07	-2.43587	0.240705	1.07539	0.0452101	-1.14563
Kcnh1	potassium voltage-gated channel, subfamily H (eag-related), member 1	1.80907e-06	8.19342	6.39667e-06	5.93121	0.307558	1.20539	0.449485	-1.14603
Accn2	amiloride-sensitive cation channel 2, neuronal	2.51323e-06	-2.85473	3.99264e-06	-2.68277	0.0567861	-1.21964	0.164929	-1.14617
Ehd3	EH-domain containing 3	4.7807e-08	24.1411	1.40446e-07	16.0321	0.131629	1.31366	0.425214	-1.14626
Tpm3	tropomyosin 3, gamma	9.00418e-06	2.03696	4.79611e-05	1.76165	0.90665	1.00872	0.0934106	-1.14629
Rasal1	RAS protein activator like 1 (GAP1 like)	3.15807e-06	-2.12809	2.87724e-06	-2.14803	0.0888284	-1.13683	0.0714125	-1.14748
Csrp1	cysteine and glycine-rich protein 1	2.15715e-06	2.79352	4.13675e-06	2.56721	0.549768	-1.05495	0.145976	-1.14795
MLL3	myeloid/lymphoid or mixed-lineage leukemia 3	5.43809e-06	-1.60354	1.73236e-07	-2.0954	0.0196785	1.1381	0.0145507	-1.14818
Pex26	peroxisomal biogenesis factor 26	1.05606e-05	-2.23182	2.67875e-06	-2.62067	0.79556	1.02239	0.132487	-1.14851
RT1-Db1	RT1 class II, locus Db1	0.00113401	4.13517	0.00198753	3.64912	0.96347	-1.01367	0.642397	-1.14869
LOC689574	hypothetical protein LOC689574	1.02217e-06	2.14865	1.20683e-06	2.11377	0.0671712	-1.13028	0.0432082	-1.14893
Znf532	zinc finger protein 532	0.000341255	1.87196	3.99139e-05	2.34742	0.00846561	-1.44101	0.223467	-1.14914
RGD1309410	LOC363020	1.852e-06	-2.51885	1.02644e-06	-2.71229	0.413061	-1.06738	0.102555	-1.14935
Nr2f2	nuclear receptor subfamily 2, group F, member 2	0.000340933	-1.9554	5.34302e-05	-2.40188	0.572092	1.06861	0.251338	-1.14947
Akap8l	A kinase (PRKA) anchor protein 8-like	0.000172969	-1.93445	2.51167e-05	-2.37693	0.530163	1.06801	0.199639	-1.1505
Sorl1	sortilin-related receptor, LDLR class A repeats-containing	4.42522e-08	-8.0013	2.60183e-08	-9.25243	0.963035	1.00504	0.218693	-1.15057
Rerg	RAS-like, estrogen-regulated, growth-inhibitor	5.13059e-05	-3.30035	1.28361e-05	-4.23696	0.495234	1.11523	0.383427	-1.15114
Hdac5	histone deacetylase 5	0.000197458	-2.01314	8.02841e-05	-2.21741	0.692105	-1.04553	0.229117	-1.15161
Nedd4	neural precursor cell expressed, developmentally down-regulated 4	4.00898e-05	2.47848	1.59114e-05	2.80152	0.046541	-1.30173	0.243463	-1.15163
Klf7	Kruppel-like factor 7 (ubiquitous)	0.00177247	2.6452	0.0021602	2.56252	0.619287	-1.11567	0.523713	-1.15167
Ifit2	interferon-induced protein with tetratricopeptide repeats 2	0.524673	1.1493	0.056697	1.59294	0.0558131	-1.5963	0.518581	-1.15172
Hectd2	HECT domain containing 2 [Mus musculus]	0.00143995	-1.89245	0.000455369	-2.14842	0.917088	-1.01452	0.323235	-1.15175
Paqr5	progestin and adipoQ receptor family member V	8.51043e-07	-3.08504	4.09524e-07	-3.45029	0.732685	-1.02987	0.127868	-1.1518
Cxcl3	chemokine (C-X-C motif) ligand 3	5.08215e-06	25.0015	9.66968e-06	19.1831	0.692269	1.13131	0.650347	-1.15204
Lrig3	leucine-rich repeats and immunoglobulin-like domains 3	0.000151805	-2.24311	2.35978e-05	-2.85508	0.433365	1.10448	0.272812	-1.15242
Ninj1	ninjurin 1	1.03531e-06	3.15457	4.47752e-06	2.5804	0.51884	1.0605	0.141076	-1.15277
Pkib	protein kinase (cAMP-dependent, catalytic) inhibitor beta	0.212999	2.25856	0.457676	1.5997	0.745946	1.22378	0.818276	-1.15369
Bcl3	B-cell CLL/lymphoma 3	6.41399e-05	3.26056	3.55103e-05	3.60869	0.155481	-1.27693	0.385764	-1.15374
Col18a1	collagen, type XVIII, alpha 1	4.64979e-07	8.54741	3.89719e-07	8.98086	0.225256	-1.21237	0.357414	-1.15386
Ccdc77	coiled-coil domain containing 77	0.00438828	-1.70106	0.195669	-1.21059	0.00728489	-1.62147	0.321005	-1.15395
Svep1	Sushi, von Willebrand factor type A, EGF and pentraxin domain containing 1	0.720868	1.08148	0.084223	1.51747	0.0521939	-1.61951	0.517059	-1.1542
Calcb	calcitonin-related polypeptide, beta	1.69184e-06	61.3363	2.6045e-06	48.9041	0.809516	1.08639	0.677168	-1.15448
Enpp3	ectonucleotide pyrophosphatase/phosphodiesterase 3	1.10258e-06	6.20662	2.62029e-06	5.10432	0.720411	1.05308	0.332638	-1.15467
Krt17	keratin 17	2.19522e-11	202.958	1.98548e-11	217.086	0.0739717	-1.23546	0.198867	-1.15506
Akt3	v-akt murine thymoma viral oncogene homolog 3 (protein kinase B, gamma)	0.00111772	4.63106	0.00887978	2.89619	0.324474	1.38394	0.653154	-1.15541
2012-09-11	septin 11	0.0033944	-1.82926	0.208689	1.22257	0.000196162	-2.58426	0.354064	-1.15555
RGD1308350	similar to hypothetical protein MGC13251	1.37493e-07	4.42597	3.69148e-07	3.707	0.716543	1.03322	0.134578	-1.15556
Cisd2	CDGSH iron sulfur domain 2	8.30755e-07	2.20494	4.24472e-06	1.89368	0.901549	1.00746	0.0377528	-1.15575
Ttc38	tetratricopeptide repeat domain 38	3.10375e-06	-2.35209	3.67745e-06	-2.30797	0.0601044	-1.1779	0.0890354	-1.1558
Ctss	cathepsin S	0.168728	1.34171	0.00982062	1.92369	0.0315366	-1.65772	0.476388	-1.15621
Naaa	N-acylethanolamine acid amidase	4.36488e-07	-3.43089	3.06469e-07	-3.63401	0.324011	-1.09174	0.12013	-1.15637
Gpr116	G protein-coupled receptor 116	5.35169e-05	-2.24492	1.58255e-06	-3.66372	0.0107096	1.41076	0.1988	-1.15683
Rbpms	RNA binding protein with multiple splicing	9.09257e-05	3.45952	5.77537e-05	3.75529	0.22193	-1.2558	0.421378	-1.15689
Gpx8	glutathione peroxidase 8	2.41904e-05	3.6514	0.000131632	2.77736	0.416795	1.13629	0.357054	-1.15701
Dcxr	dicarbonyl L-xylulose reductase	4.62374e-06	-2.14049	4.37067e-05	-1.75315	0.0011516	-1.41328	0.070635	-1.15753
Arsb	arylsulfatase B	5.13974e-05	2.04186	1.91214e-05	2.26603	0.025293	-1.28463	0.147644	-1.15755
Tbc1d19	TBC1 domain family, member 19	0.00988107	-1.417	0.56391	-1.06436	0.00310279	-1.54124	0.195368	-1.15768
Chrnb4	cholinergic receptor, nicotinic, beta 4	5.06347e-06	2.10069	3.43608e-05	1.77356	0.750454	1.02307	0.067449	-1.15774
Mycn	v-myc myelocytomatosis viral related oncogene, neuroblastoma derived (avian)	0.000522489	-5.41662	0.00163367	-4.09405	0.196685	-1.53178	0.641481	-1.15777
Osbpl5	oxysterol binding protein-like 5	9.29571e-06	-1.90148	3.74526e-06	-2.06539	0.353532	-1.06616	0.0540673	-1.15806
Spa17	sperm autoantigenic protein 17	0.000298064	-2.30049	0.00134926	-1.93273	0.0474212	-1.37847	0.31581	-1.1581
Gca	grancalcin	8.19214e-06	-2.55357	1.98313e-06	-3.09925	0.630165	1.04781	0.153883	-1.15831
Tet3	tet methylcytosine dioxygenase 3	0.0011472	-1.89213	0.000274931	-2.21413	0.940337	1.01004	0.288006	-1.15855
Arhgap27	Rho GTPase activating protein 27	7.06583e-05	-2.47925	0.000347529	-2.05561	0.0248317	-1.39733	0.259959	-1.15856
Mfsd4	major facilitator superfamily domain containing 4	0.000123185	-4.37954	8.08536e-05	-4.79843	0.800085	-1.05755	0.510173	-1.1587
RT1-T24-3	RT1 class I, locus T24, gene 3	0.0352184	2.6112	0.0738085	2.18105	0.933746	1.03307	0.707556	-1.15889
H19	H19, imprinted maternally expressed transcript	1.85025e-05	6.27061	4.67886e-05	5.03272	0.73265	1.07482	0.489383	-1.15924
LOC684122	similar to development and differentiation enhancing factor-like 1	2.79558e-06	-2.4375	3.93303e-06	-2.34368	0.0410482	-1.20564	0.0908507	-1.15924
Jph2	junctophilin 2	0.0001298	2.53725	0.00144348	1.90584	0.338954	1.14803	0.30699	-1.15965
Plau	plasminogen activator, urokinase	4.78527e-05	8.46039	0.000146754	6.18266	0.557371	1.18	0.598691	-1.15966
CPEB3	cytoplasmic polyadenylation element binding protein 3 [Homo sapiens]	0.000102346	-3.7635	6.16689e-05	-4.15287	0.795943	-1.0512	0.449814	-1.15996
Elk3	ELK3, member of ETS oncogene family	1.93521e-07	2.01743	8.68104e-07	1.78285	0.572326	-1.02553	0.00837693	-1.16046
ZAK	sterile alpha motif and leucine zipper containing kinase AZK	4.96961e-06	3.33363	1.26434e-05	2.894	0.947112	-1.0077	0.22022	-1.16078
RGD1562037	similar to OTTHUMP00000046255	6.3066e-08	3.88103	3.84904e-07	2.93132	0.104758	1.14012	0.0704859	-1.16127
Pragmin	pragma of Rnd2	3.77604e-05	2.10058	0.000280008	1.74611	0.708057	1.03592	0.138686	-1.16129
Ifrd1	interferon-related developmental regulator 1	0.000233233	2.33498	0.00155386	1.88134	0.637663	1.06812	0.297233	-1.16198
Zadh2	zinc binding alcohol dehydrogenase, domain containing 2	3.62156e-08	-2.5067	7.47475e-09	-3.07259	0.272697	1.05476	0.0105562	-1.16211
Arpc1b	actin related protein 2/3 complex, subunit 1B	4.57293e-09	7.12207	8.1168e-09	6.20818	0.865796	-1.01307	0.0780124	-1.1622
NAA25	N(alpha)-acetyltransferase 25, NatB auxiliary subunit	4.7871e-05	1.92514	1.29371e-05	2.18933	0.00987407	-1.32176	0.107359	-1.16226
Wee1	wee 1 homolog (S. pombe)	0.000413778	-1.89031	1.44246e-05	-2.78838	0.062417	1.2691	0.209178	-1.16231
Bcl11b	B-cell CLL/lymphoma 11B (zinc finger protein)	0.00029444	2.35364	0.0365514	1.42284	0.0366342	1.42255	0.314833	-1.16283
RGD1562629	similar to neurobeachin	3.94753e-05	-2.43286	0.000206729	-2.0189	0.0151384	-1.40134	0.205783	-1.1629
LOC100912730	kelch repeat and BTB domain-containing protein 7-like	3.53617e-06	-4.52164	4.31724e-06	-4.34733	0.194118	-1.20968	0.29334	-1.16305
Pycr1	pyrroline-5-carboxylate reductase 1	9.92864e-06	3.88662	2.78164e-05	3.25561	0.855477	1.02642	0.307553	-1.16309
Tmem106b	transmembrane protein 106B	9.45051e-05	-2.0916	7.8693e-05	-2.1326	0.235838	-1.14085	0.179621	-1.16321
Xdh	xanthine dehydrogenase	1.08281e-06	28.6307	8.47066e-07	31.9227	0.338499	-1.29726	0.570048	-1.16348
Il13ra1	interleukin 13 receptor, alpha 1	1.07404e-07	3.56935	2.71135e-07	3.09537	0.903977	-1.009	0.0685565	-1.16351
Raver2	ribonucleoprotein, PTB-binding 2	0.000760877	-2.13694	0.000490873	-2.25388	0.515358	-1.10316	0.324445	-1.16353
Fut2	fucosyltransferase 2 (secretor status included)	4.32032e-05	3.2311	0.000924133	2.11128	0.0982598	1.31506	0.330528	-1.16375
Degs2	degenerative spermatocyte homolog 2, lipid desaturase (Drosophila)	3.83694e-05	4.644	9.01941e-05	3.90486	0.911323	1.02191	0.444334	-1.16379
Arih1	ariadne ubiquitin-conjugating enzyme E2 binding protein homolog 1 (Drosophila)	1.60784e-06	2.13295	2.81414e-06	2.02155	0.145376	-1.10303	0.0371966	-1.16382
Phf17	PHD finger protein 17	0.000229113	-2.19523	7.78816e-05	-2.50571	0.879497	-1.01968	0.257603	-1.16389
Rasl11b	RAS-like family 11 member B	0.00291506	-2.07933	0.00107795	-2.37274	0.910497	-1.02033	0.406067	-1.1643
Csgalnact1	chondroitin sulfate N-acetylgalactosaminyltransferase 1	0.11412	1.53673	0.0181123	2.04932	0.106877	-1.5528	0.547387	-1.16441
Tmem59	transmembrane protein 59	1.26501e-06	-1.78325	2.61609e-07	-2.03267	0.646957	-1.02164	0.00956169	-1.16453
Col5a1	Collagen, type V, alpha 1	0.000151163	2.39646	0.00089261	1.95154	0.694713	1.05444	0.27577	-1.16459
Spast	spastin	1.05845e-06	-2.2401	2.48418e-07	-2.64532	0.827714	1.01388	0.0376356	-1.16473
RGD1561459	similar to RIKEN cDNA 1810020D17	1.15504e-06	-2.79877	1.63319e-07	-3.76221	0.10836	1.15367	0.0893544	-1.16518
Homer2	homer homolog 2 (Drosophila)	5.65638e-06	-2.30254	1.8517e-06	-2.62853	0.801507	-1.02074	0.0889061	-1.16526
Cnfn	cornifelin	1.67687e-05	24.3741	8.51549e-06	33.0821	0.226593	-1.58174	0.673499	-1.16539
Mgst3	microsomal glutathione S-transferase 3	1.04453e-05	-1.85119	1.25032e-06	-2.26006	0.483793	1.04759	0.0420249	-1.16541
Slc25a23	solute carrier family 25 (mitochondrial carrier; phosphate carrier), member 23	6.65138e-07	-2.83835	5.10032e-07	-2.9438	0.156456	-1.12381	0.0741957	-1.16556
Rhoc	ras homolog gene family, member C	8.56881e-06	2.25273	0.000105284	1.77667	0.332007	1.08759	0.0958854	-1.16583
Sfrp1	secreted frizzled-related protein 1	0.000271381	-1.97624	6.41298e-05	-2.31314	0.97337	1.00382	0.202365	-1.16602
Napg	N-ethylmaleimide-sensitive factor attachment protein, gamma	8.36924e-07	-2.49415	4.96212e-07	-2.6591	0.219415	-1.09391	0.0518188	-1.16625
Vezf1	vascular endothelial zinc finger 1	2.23094e-06	-2.74431	5.48204e-07	-3.36038	0.580958	1.04985	0.106317	-1.16635
Ankh	ankylosis, progressive homolog (mouse)	0.000508011	-2.01692	0.000146024	-2.32626	0.930856	-1.01127	0.253897	-1.16637
Bre	brain and reproductive organ-expressed protein	9.09395e-07	-2.53355	6.49116e-07	-2.64111	0.141923	-1.11945	0.0563438	-1.16698
Hspb6	heat shock protein, alpha-crystallin-related, B6	1.64759e-05	-2.71097	1.34752e-05	-2.78661	0.278003	-1.13534	0.194442	-1.16702
Cage1	cancer antigen 1	0.000137704	-2.211	0.000107533	-2.27531	0.311837	-1.13422	0.221691	-1.16721
Nipbl	Nipped-B homolog (Drosophila)	6.75672e-06	-2.04331	5.50677e-06	-2.08404	0.0875232	-1.1444	0.0562254	-1.16721
Tpm2	tropomyosin 2, beta	1.15565e-07	19.4279	2.02227e-08	40.6158	0.000759574	-2.44037	0.387908	-1.16731
Cpsf6	cleavage and polyadenylation specific factor 6	1.7124e-05	-2.8283	1.92357e-05	-2.78255	0.172454	-1.18676	0.212275	-1.16756
Wipf1	WAS/WASL interacting protein family, member 1	1.36653e-06	-4.72253	9.90599e-07	-5.04707	0.483451	-1.09375	0.236501	-1.16891
Synm	synemin, intermediate filament protein	2.06529e-07	-5.02251	7.67771e-08	-6.24554	0.551339	1.0637	0.154381	-1.16905
Sytl2	synaptotagmin-like 2	0.000403004	3.30557	0.000480451	3.20306	0.561703	-1.1328	0.470005	-1.16905
Wbp1	WW domain binding protein 1	3.86084e-05	-1.97584	1.78503e-05	-2.13184	0.364707	-1.08374	0.0985448	-1.16931
Mier3	mesoderm induction early response 1, family member 3	5.20927e-06	-2.12125	1.66274e-06	-2.39681	0.632957	-1.0356	0.0563145	-1.17012
RORA	RAR-related orphan receptor A	2.16552e-05	-2.64286	1.5917e-06	-3.9601	0.0553111	1.28046	0.191962	-1.17021
Gstm5	glutathione S-transferase, mu 5	0.00010678	5.03007	0.000139542	4.73299	0.684873	-1.10121	0.511645	-1.17033
Kazald1	Kazal-type serine peptidase inhibitor domain 1	0.000326983	-1.92137	2.84507e-05	-2.52271	0.323743	1.12147	0.186152	-1.17077
Map1lc3a	microtubule-associated protein 1 light chain 3 alpha	2.18388e-06	-2.20015	9.8416e-07	-2.39903	0.310997	-1.07384	0.0434959	-1.17091
Car5b	carbonic anhydrase 5b, mitochondrial	2.98306e-05	-2.13279	2.3764e-06	-2.89614	0.137661	1.1597	0.117035	-1.17092
Fgr	Gardner-Rasheed feline sarcoma viral (v-fgr) oncogene homolog	0.000928797	2.38024	0.0117378	1.73702	0.382889	1.16995	0.379684	-1.17125
Cbr4	carbonyl reductase 4	8.38283e-06	-2.70371	8.41902e-06	-2.70216	0.148687	-1.17197	0.149976	-1.1713
Cugbp1	CUG triplet repeat, RNA binding protein 1	1.37214e-07	3.22529	1.42607e-07	3.20674	0.0562606	-1.16473	0.04932	-1.17146
Mgmt	O-6-methylguanine-DNA methyltransferase	2.70859e-09	-5.32712	3.69276e-09	-4.99608	0.00563732	-1.24911	0.0284861	-1.17148
Gga2	golgi associated, gamma adaptin ear containing, ARF binding protein 2	2.11712e-06	3.19493	2.52492e-05	2.30201	0.117511	1.18472	0.140085	-1.17149
Flnb	filamin, beta	1.87896e-05	3.33849	0.000159699	2.44323	0.284886	1.16626	0.271779	-1.17163
Ugcg	UDP-glucose ceramide glucosyltransferase	0.000577709	2.1939	0.0115274	1.59391	0.292622	1.17479	0.300177	-1.17164
Kcnk5	potassium channel, subfamily K, member 5	0.000146437	2.39616	0.000836786	1.95871	0.749345	1.04381	0.2557	-1.17199
Gmds	GDP-mannose 4, 6-dehydratase	2.28405e-05	2.31144	0.000567604	1.69505	0.15252	1.16352	0.136133	-1.172
Podn /// Scp2	podocan /// sterol carrier protein 2	1.96061e-05	-1.74292	3.51693e-06	-2.01247	0.816034	-1.01507	0.0340549	-1.17206
Cxcl12	chemokine (C-X-C motif) ligand 12 (stromal cell-derived factor 1)	7.71214e-06	-2.96457	1.78797e-06	-3.73764	0.517468	1.07534	0.176423	-1.17243
Cyp26b1	cytochrome P450, family 26, subfamily b, polypeptide 1	0.000319113	3.02729	0.0194171	1.71123	0.0561426	1.50861	0.41251	-1.17265
Cyp4a8	cytochrome P450, family 4, subfamily a, polypeptide 8	0.000395137	2.46965	0.0010184	2.18271	0.823358	-1.03647	0.334898	-1.17272
Sgcg	sarcoglycan, gamma (dystrophin-associated glycoprotein)	0.000137642	-2.39795	0.591438	-1.07454	7.03508e-05	-2.61792	0.249579	-1.1731
Fam81a	family with sequence similarity 81, member A	1.47307e-05	-2.32557	5.69566e-06	-2.60832	0.634293	-1.04597	0.117028	-1.17314
Prkag2	protein kinase, AMP-activated, gamma 2 non-catalytic subunit	2.39565e-05	-2.15955	8.61023e-06	-2.42116	0.621074	-1.0466	0.108752	-1.17339
CTNND2	catenin (cadherin-associated protein), delta 2 (neural plakophilin-related arm-repeat protein)	1.46842e-05	-4.41052	1.2375e-05	-4.56628	0.455511	-1.13347	0.34594	-1.1735
Stk17b	Serine/threonine kinase 17b	6.99711e-05	2.13988	0.000180663	1.94282	0.547911	-1.0658	0.153113	-1.1739
Tnf	tumor necrosis factor (TNF superfamily, member 2)	0.426857	1.26266	0.0594164	1.84354	0.0890127	-1.71458	0.57996	-1.17433
Prpf39	PRP39 pre-mRNA processing factor 39 homolog (S. cerevisiae)	1.27798e-05	-1.94769	1.83686e-06	-2.36911	0.63099	1.0358	0.0519426	-1.17434
Prom2	prominin 2	0.000765158	-1.49286	1.59213e-05	-2.01369	0.106541	1.14858	0.0678802	-1.17439
Fam81a	family with sequence similarity 81, member A	0.000155641	-2.35666	7.87937e-05	-2.57264	0.584007	-1.07594	0.245259	-1.17455
MAN1A2	mannosidase, alpha, class 1A, member 2	9.51418e-06	2.1738	4.30672e-05	1.88132	0.839545	-1.01663	0.0754484	-1.17468
Flt1	fms-related tyrosine kinase 1	0.0534317	-2.08951	0.0278393	-2.39455	0.941047	-1.02516	0.634017	-1.17481
Gbp4	guanylate binding protein 4	2.32079e-05	3.36678	7.89948e-07	6.6944	0.000288794	-2.33667	0.279299	-1.17517
Myo5c	myosin VC	8.12592e-07	-7.49105	4.90182e-07	-8.58455	0.868201	-1.02566	0.306254	-1.17538
Nr1d2	Nuclear receptor subfamily 1, group D, member 2	8.29611e-06	-2.72418	2.98878e-06	-3.15083	0.874927	-1.01637	0.144147	-1.17555
HLF	hepatic leukemia factor	1.35562e-06	-7.47887	8.89107e-07	-8.37874	0.766727	-1.04966	0.33472	-1.17596
[truncated: 1,888 more rows]
